# Supplementary material for: The Use of Kosher Phenotyping for Mapping QTL Affecting Susceptibility to Bovine Respiratory Disease
Source: PubMed Central journal article supplement (PMC4831767; doi:10.1371/journal.pone.0153423), 2016-04-14

# BTA 1

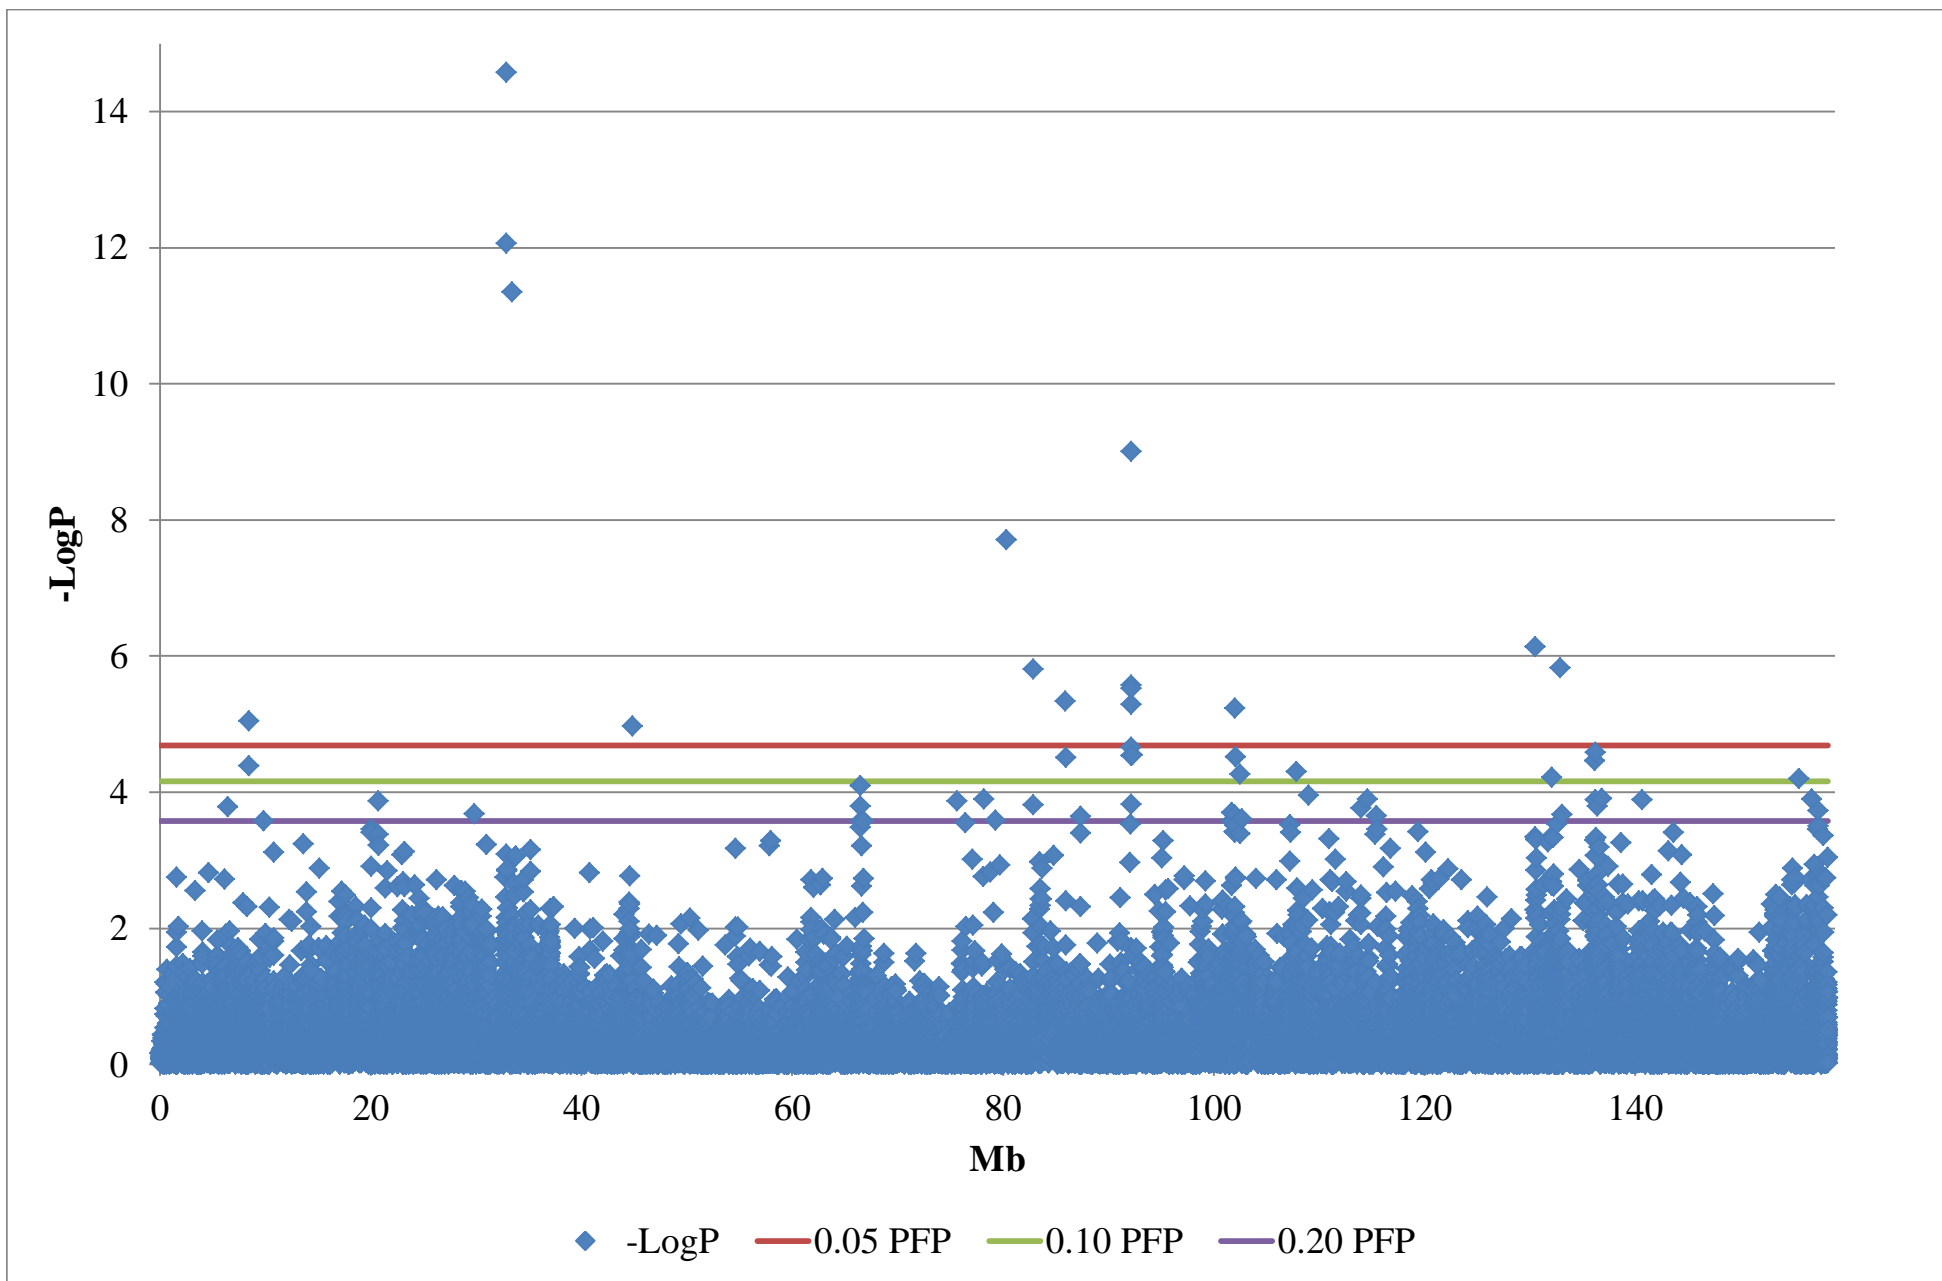

# BTA 2

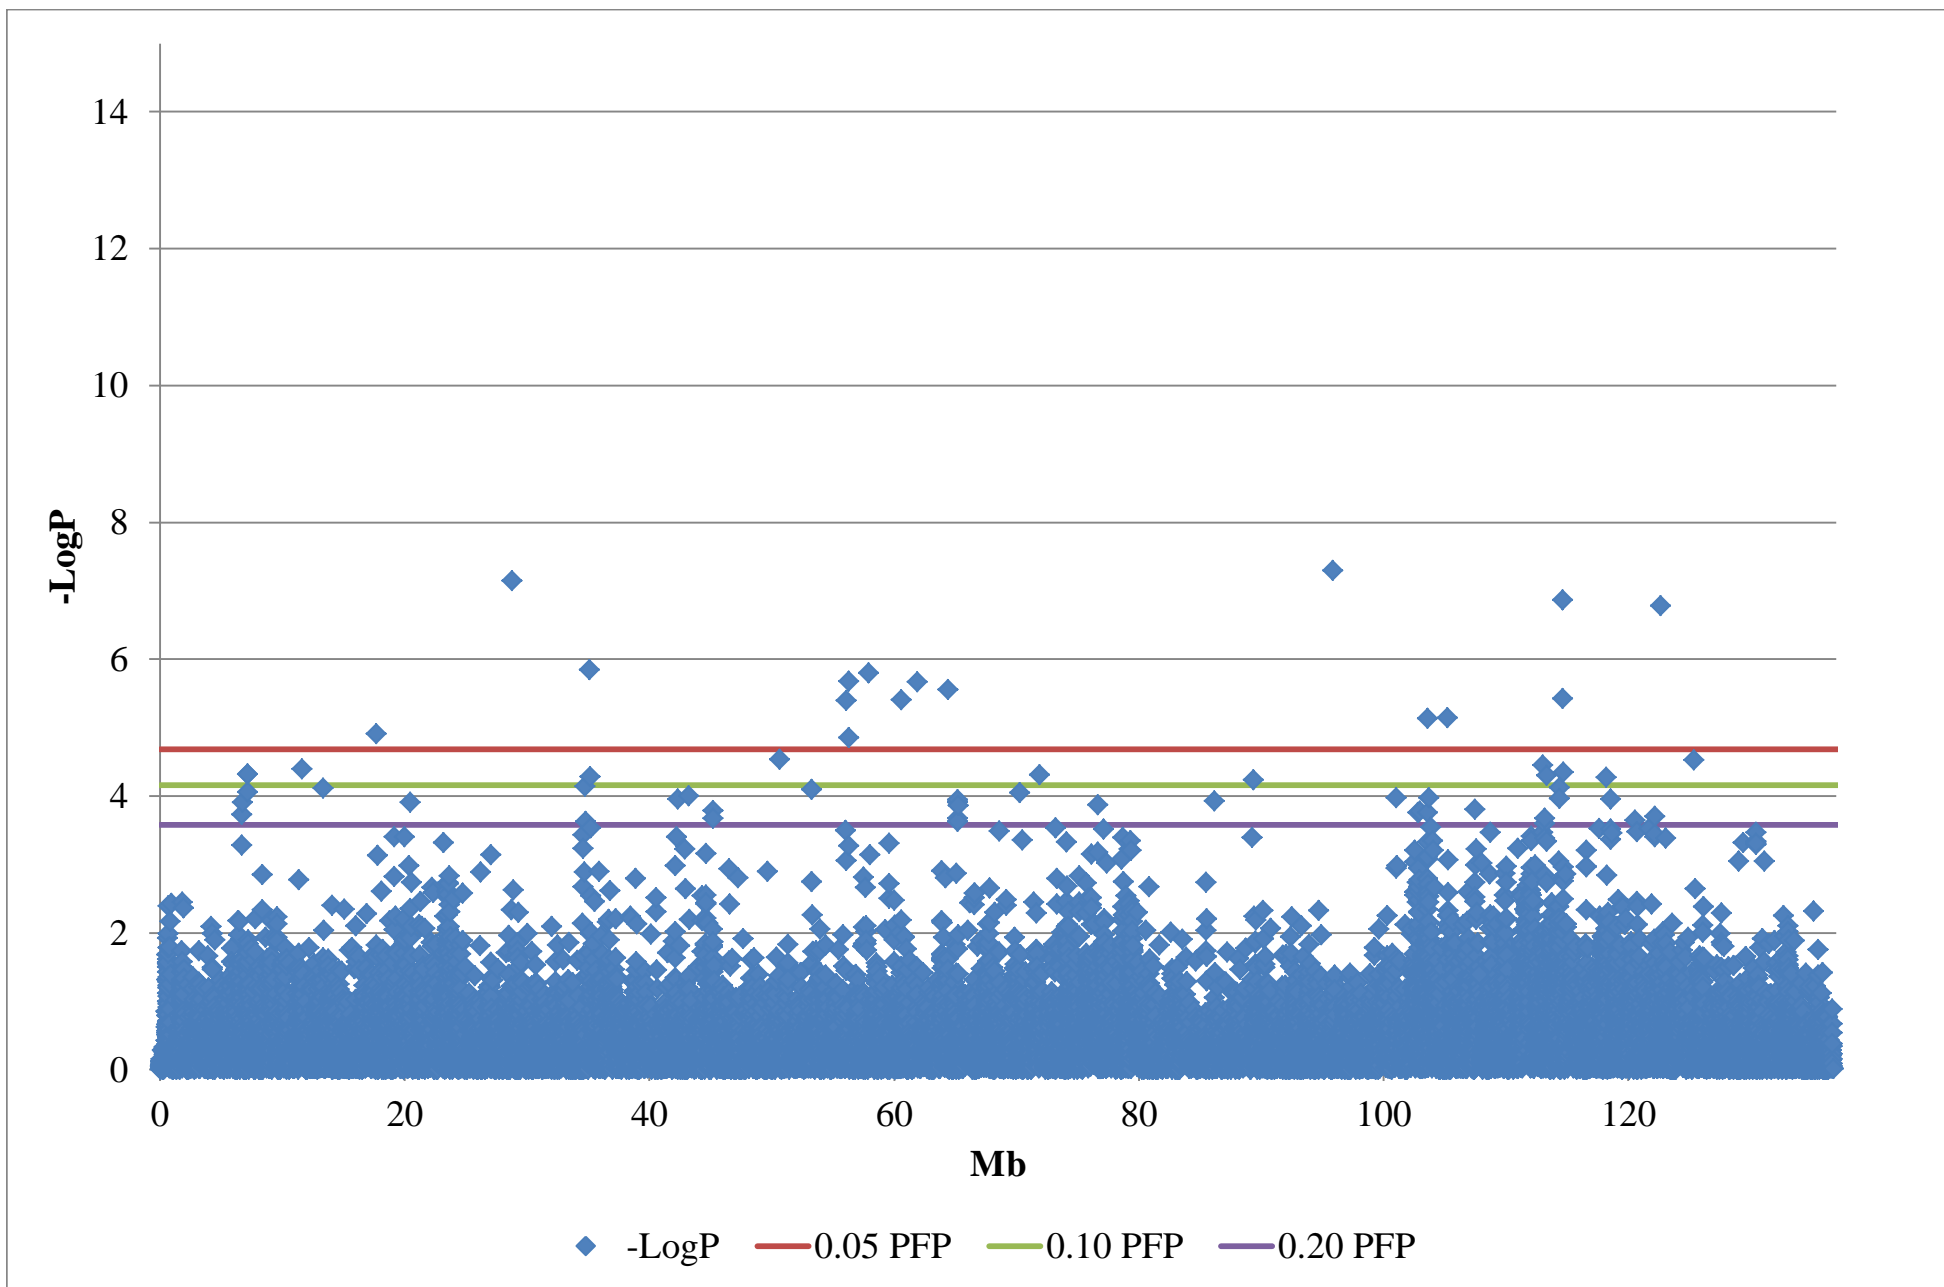

### BTA 3

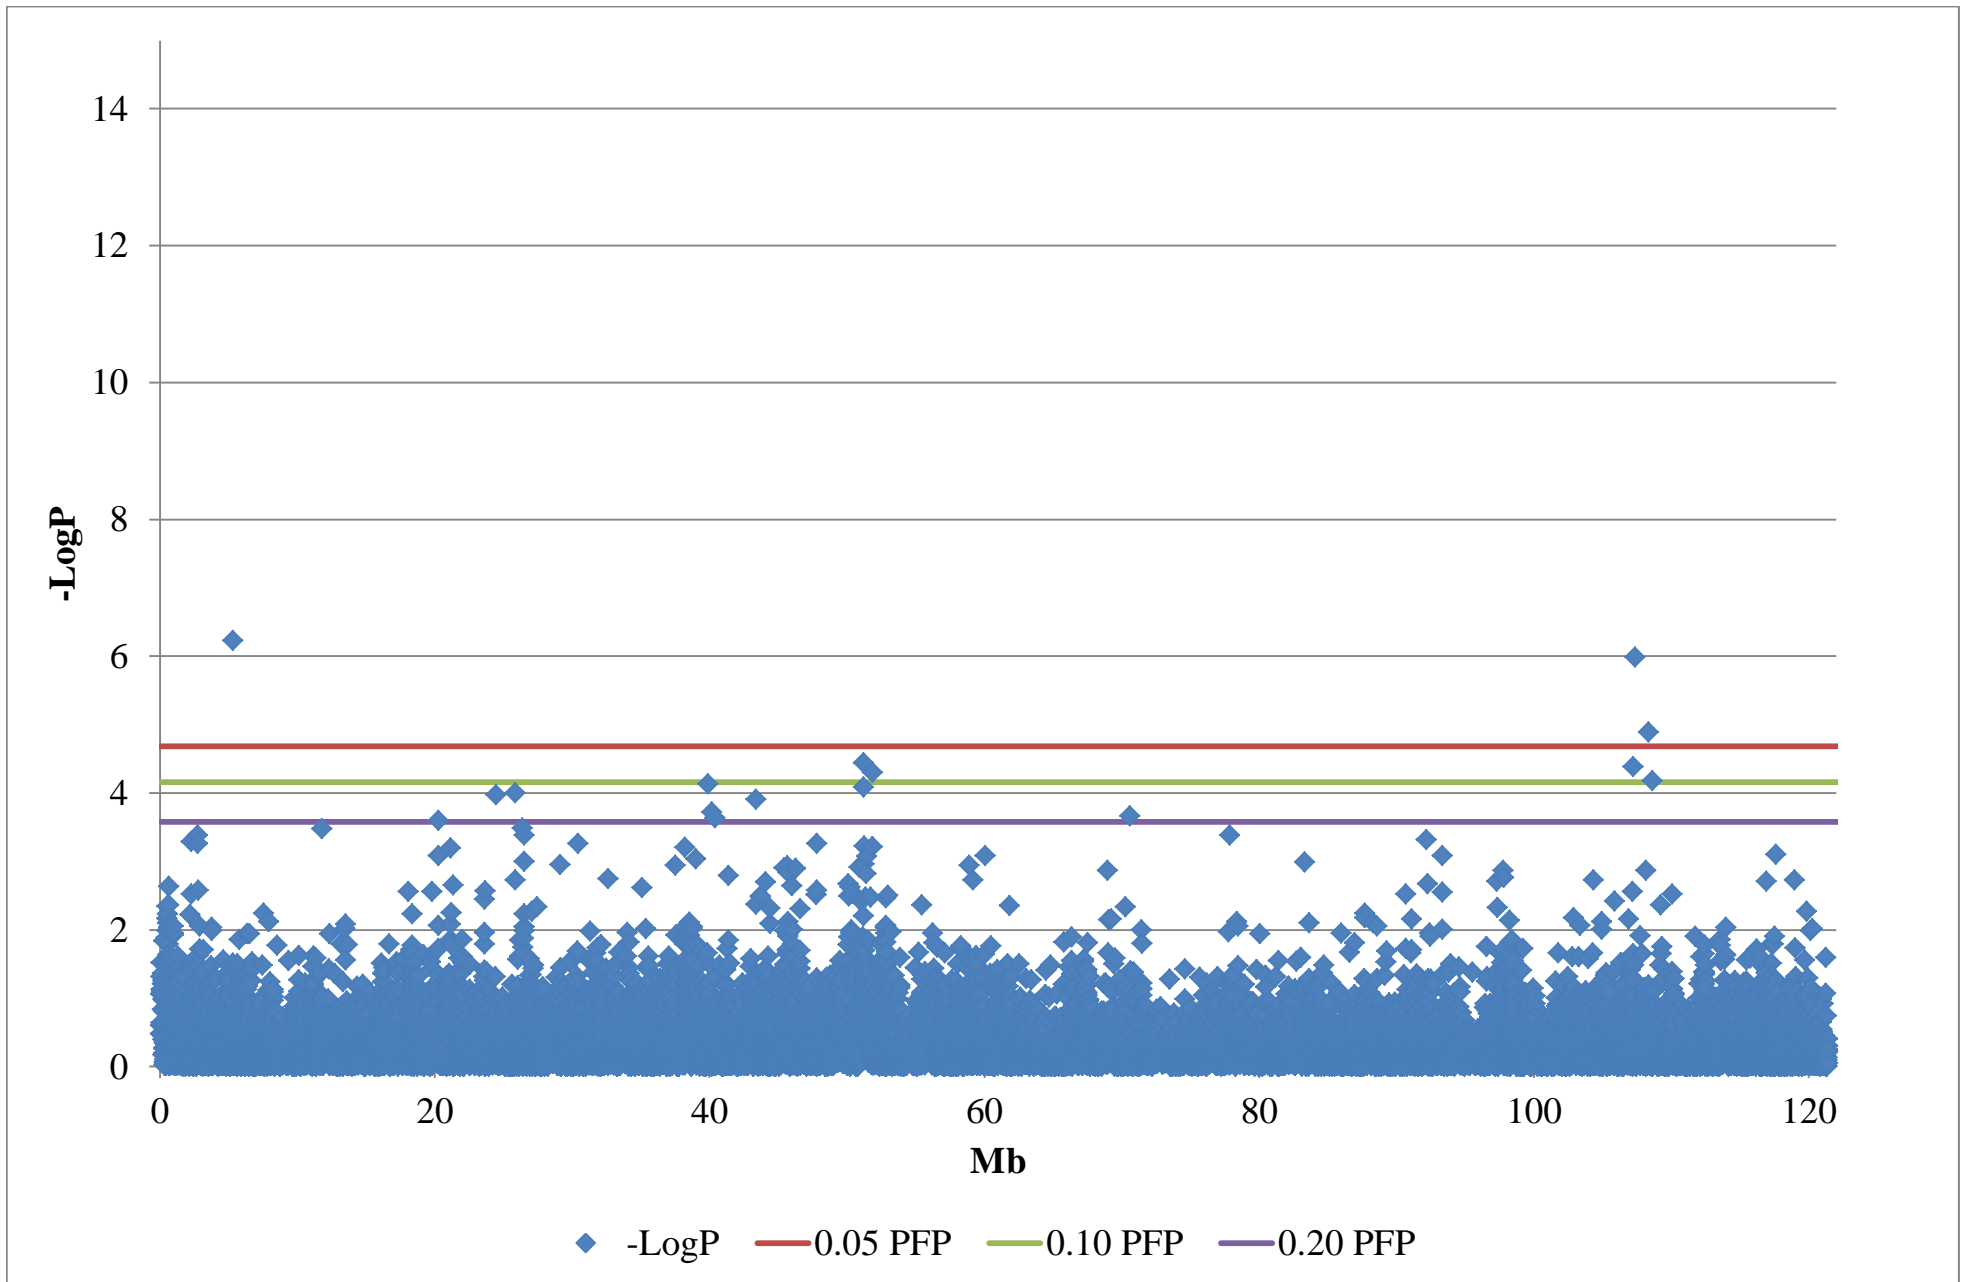

# BTA 4

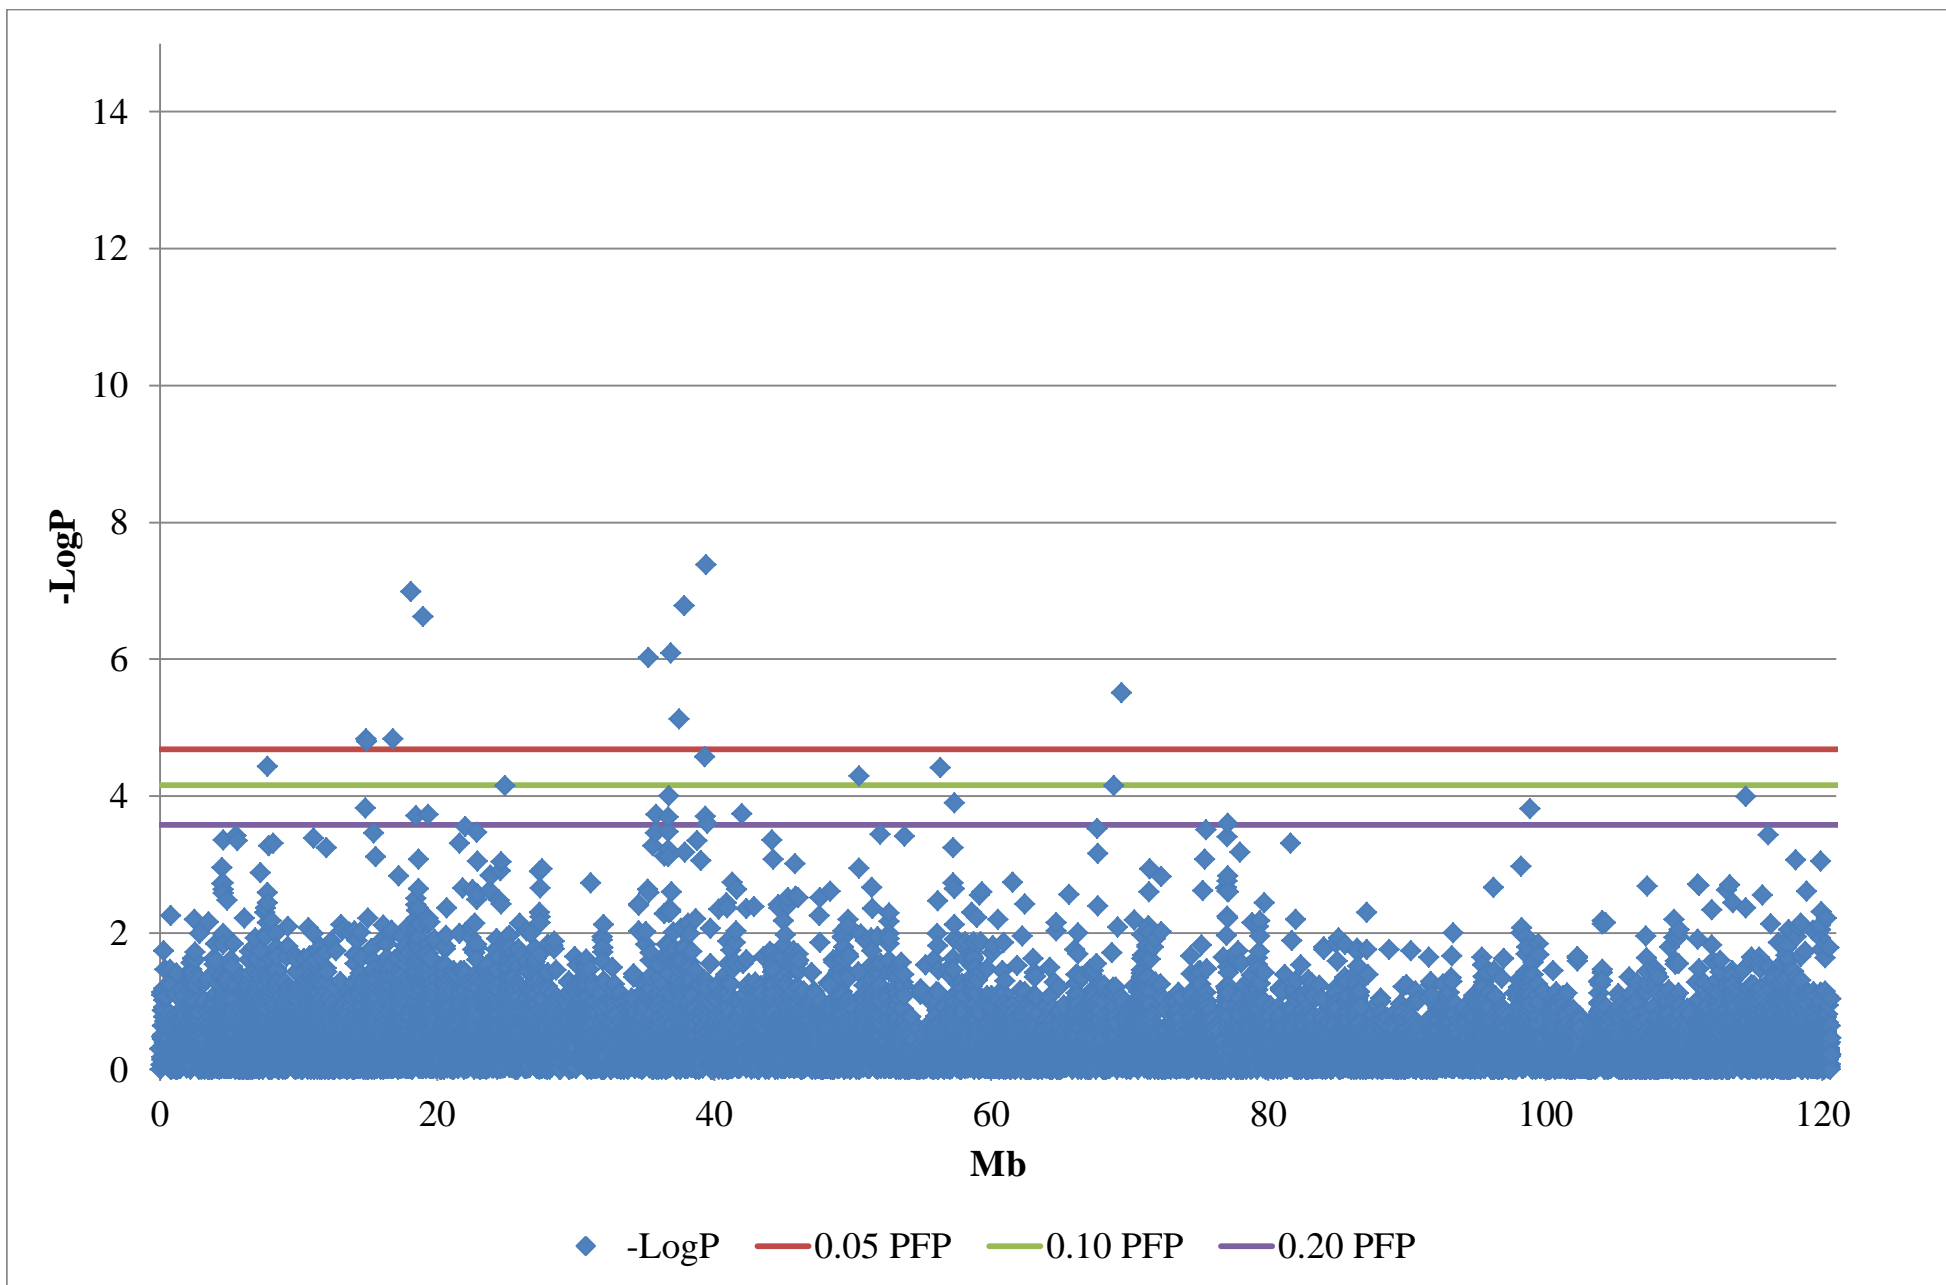

BTA 5

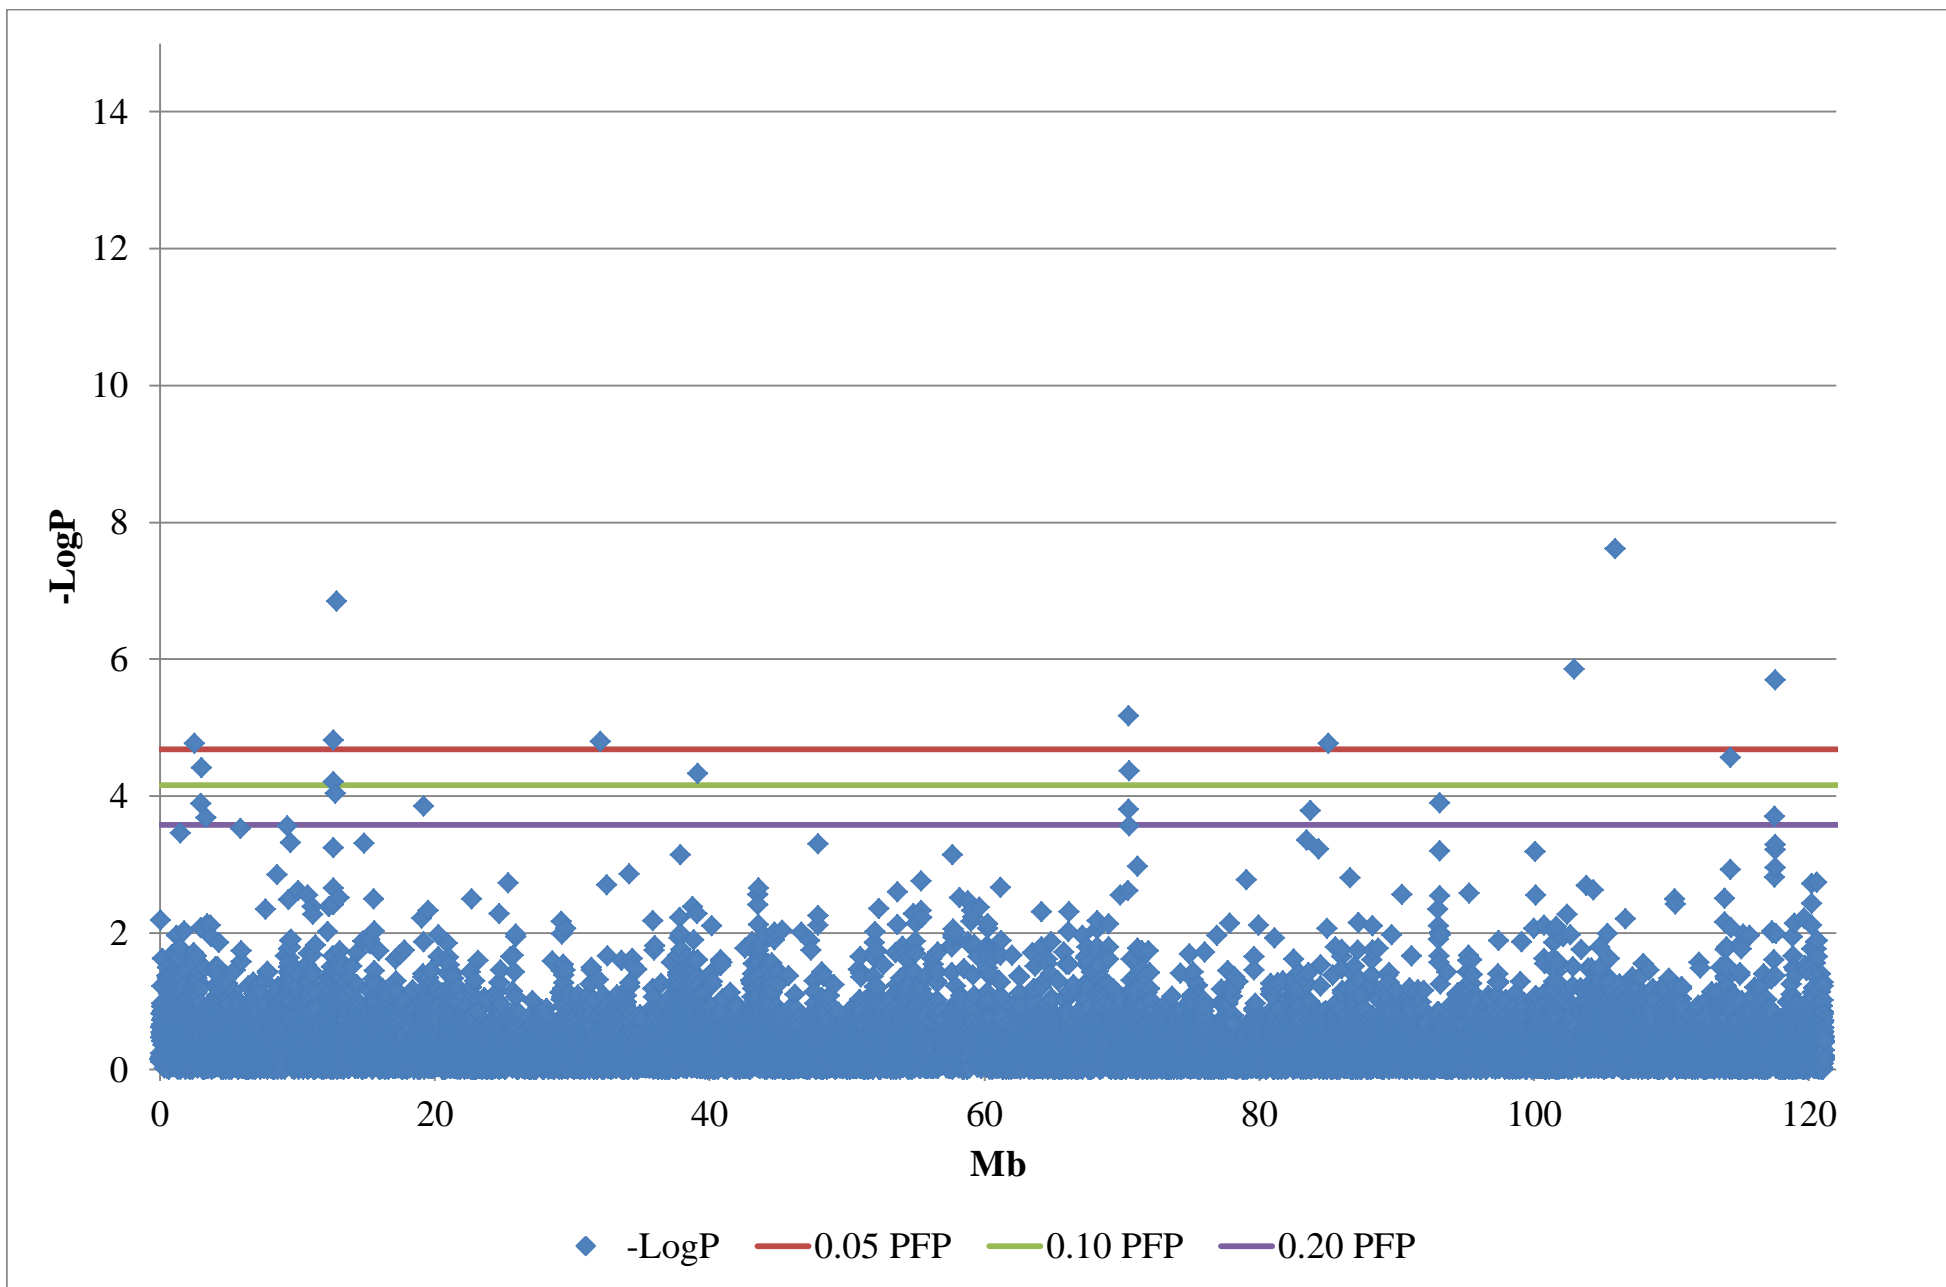

# BTA 6

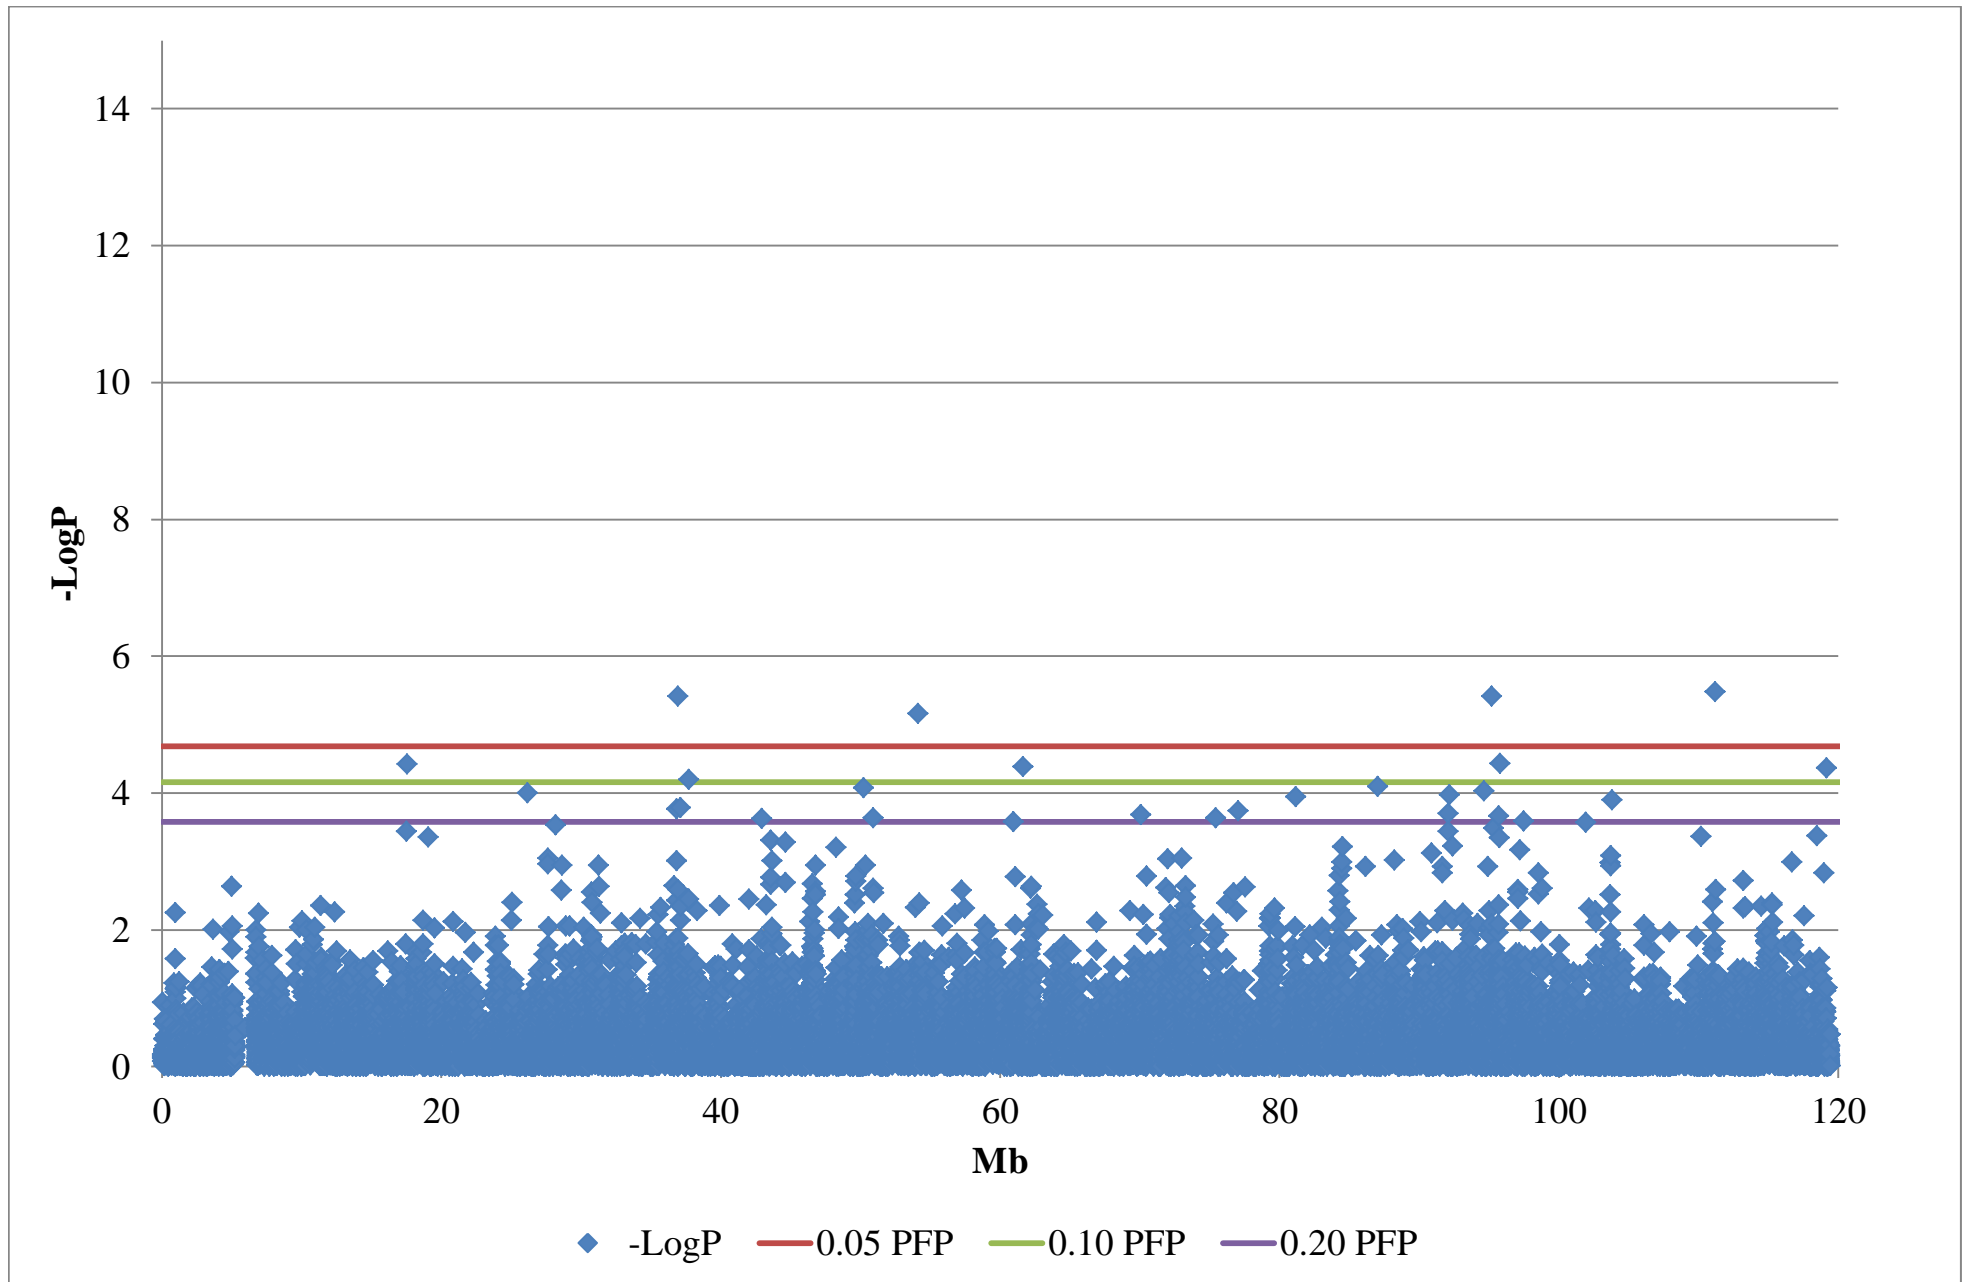

**BTA 7**

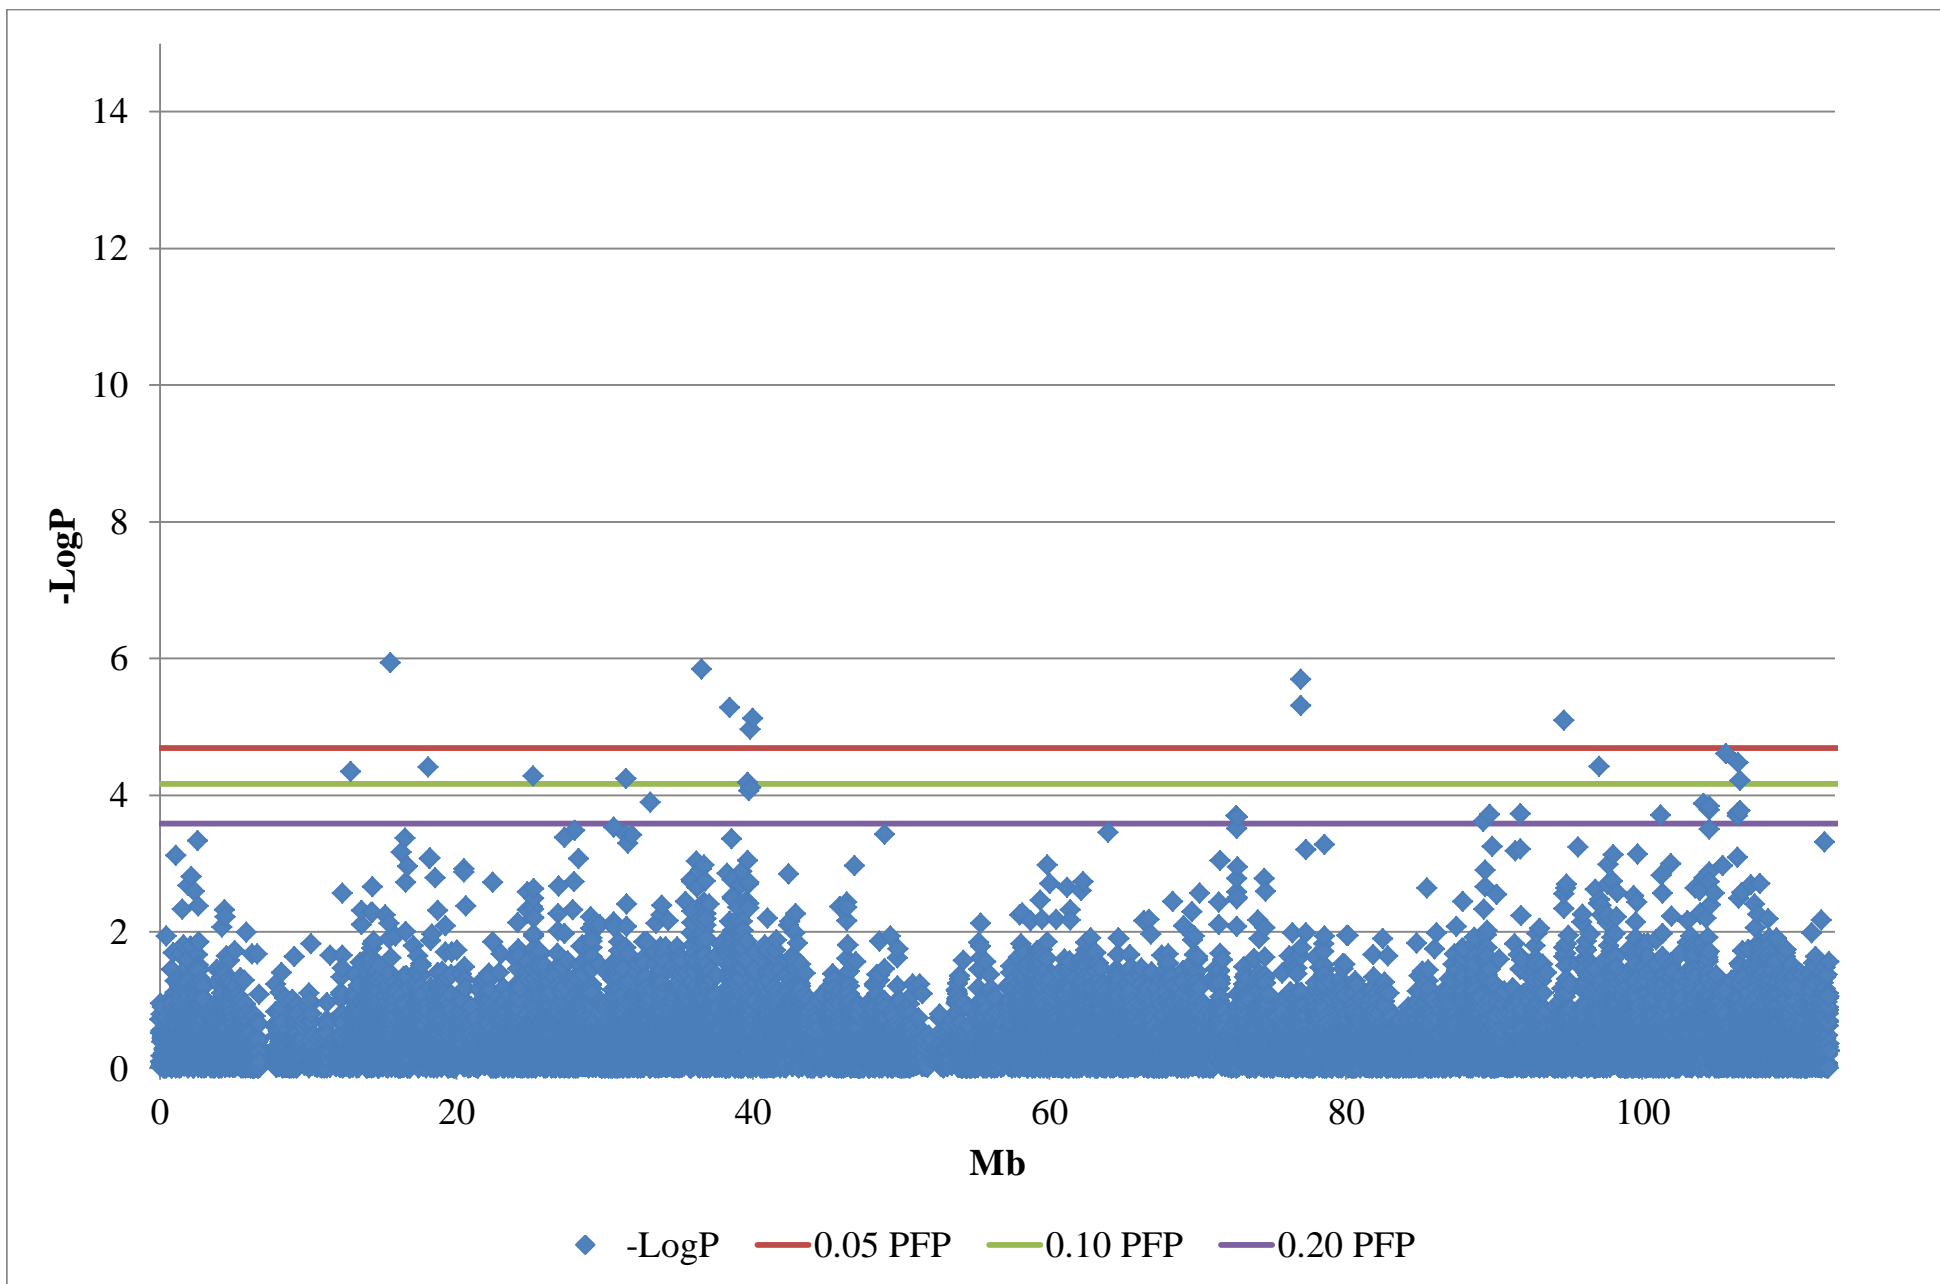

# BTA 8

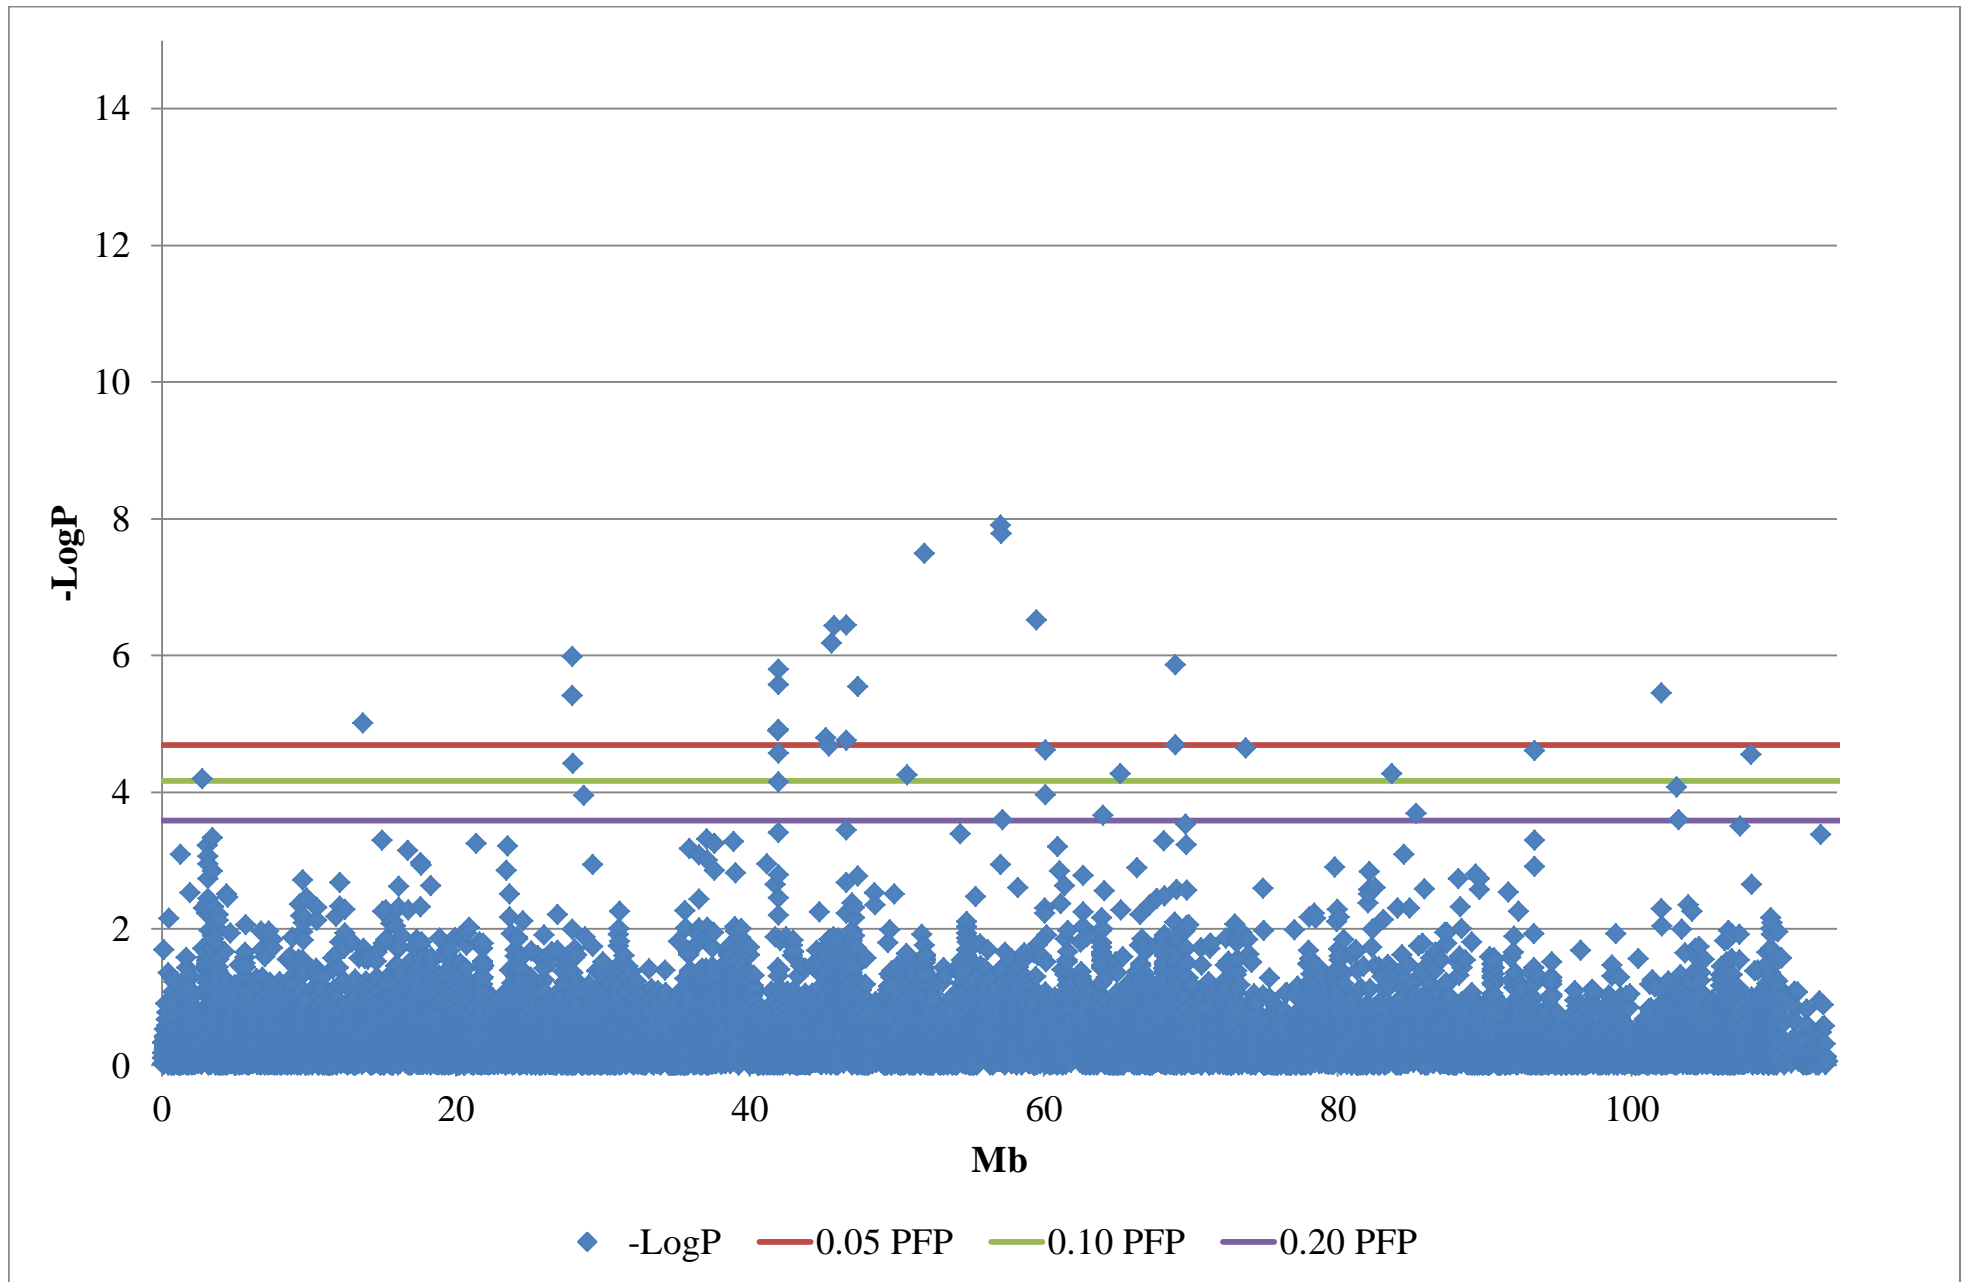



# BTA 9

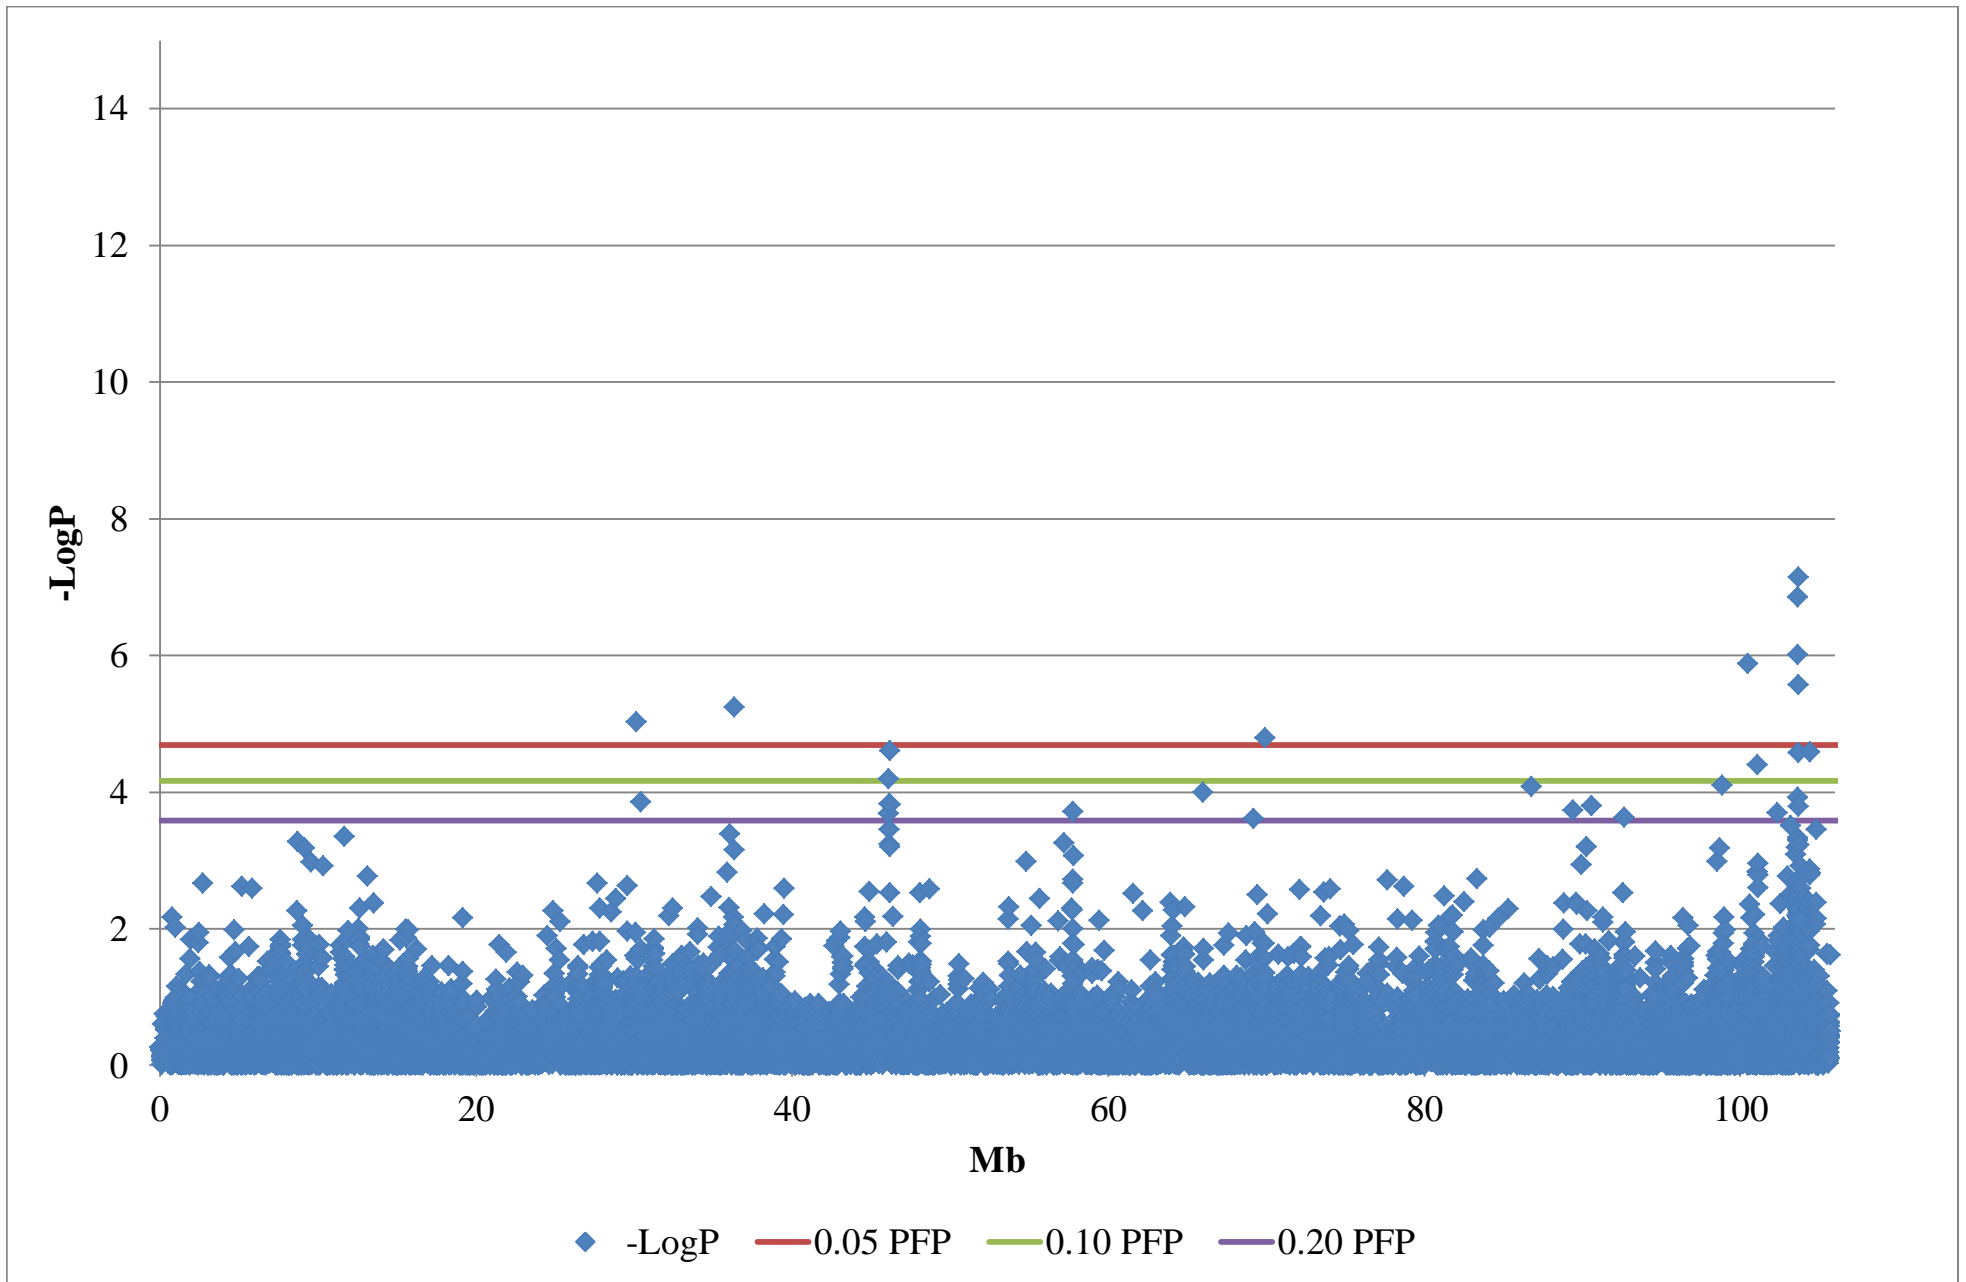

# BTA 10

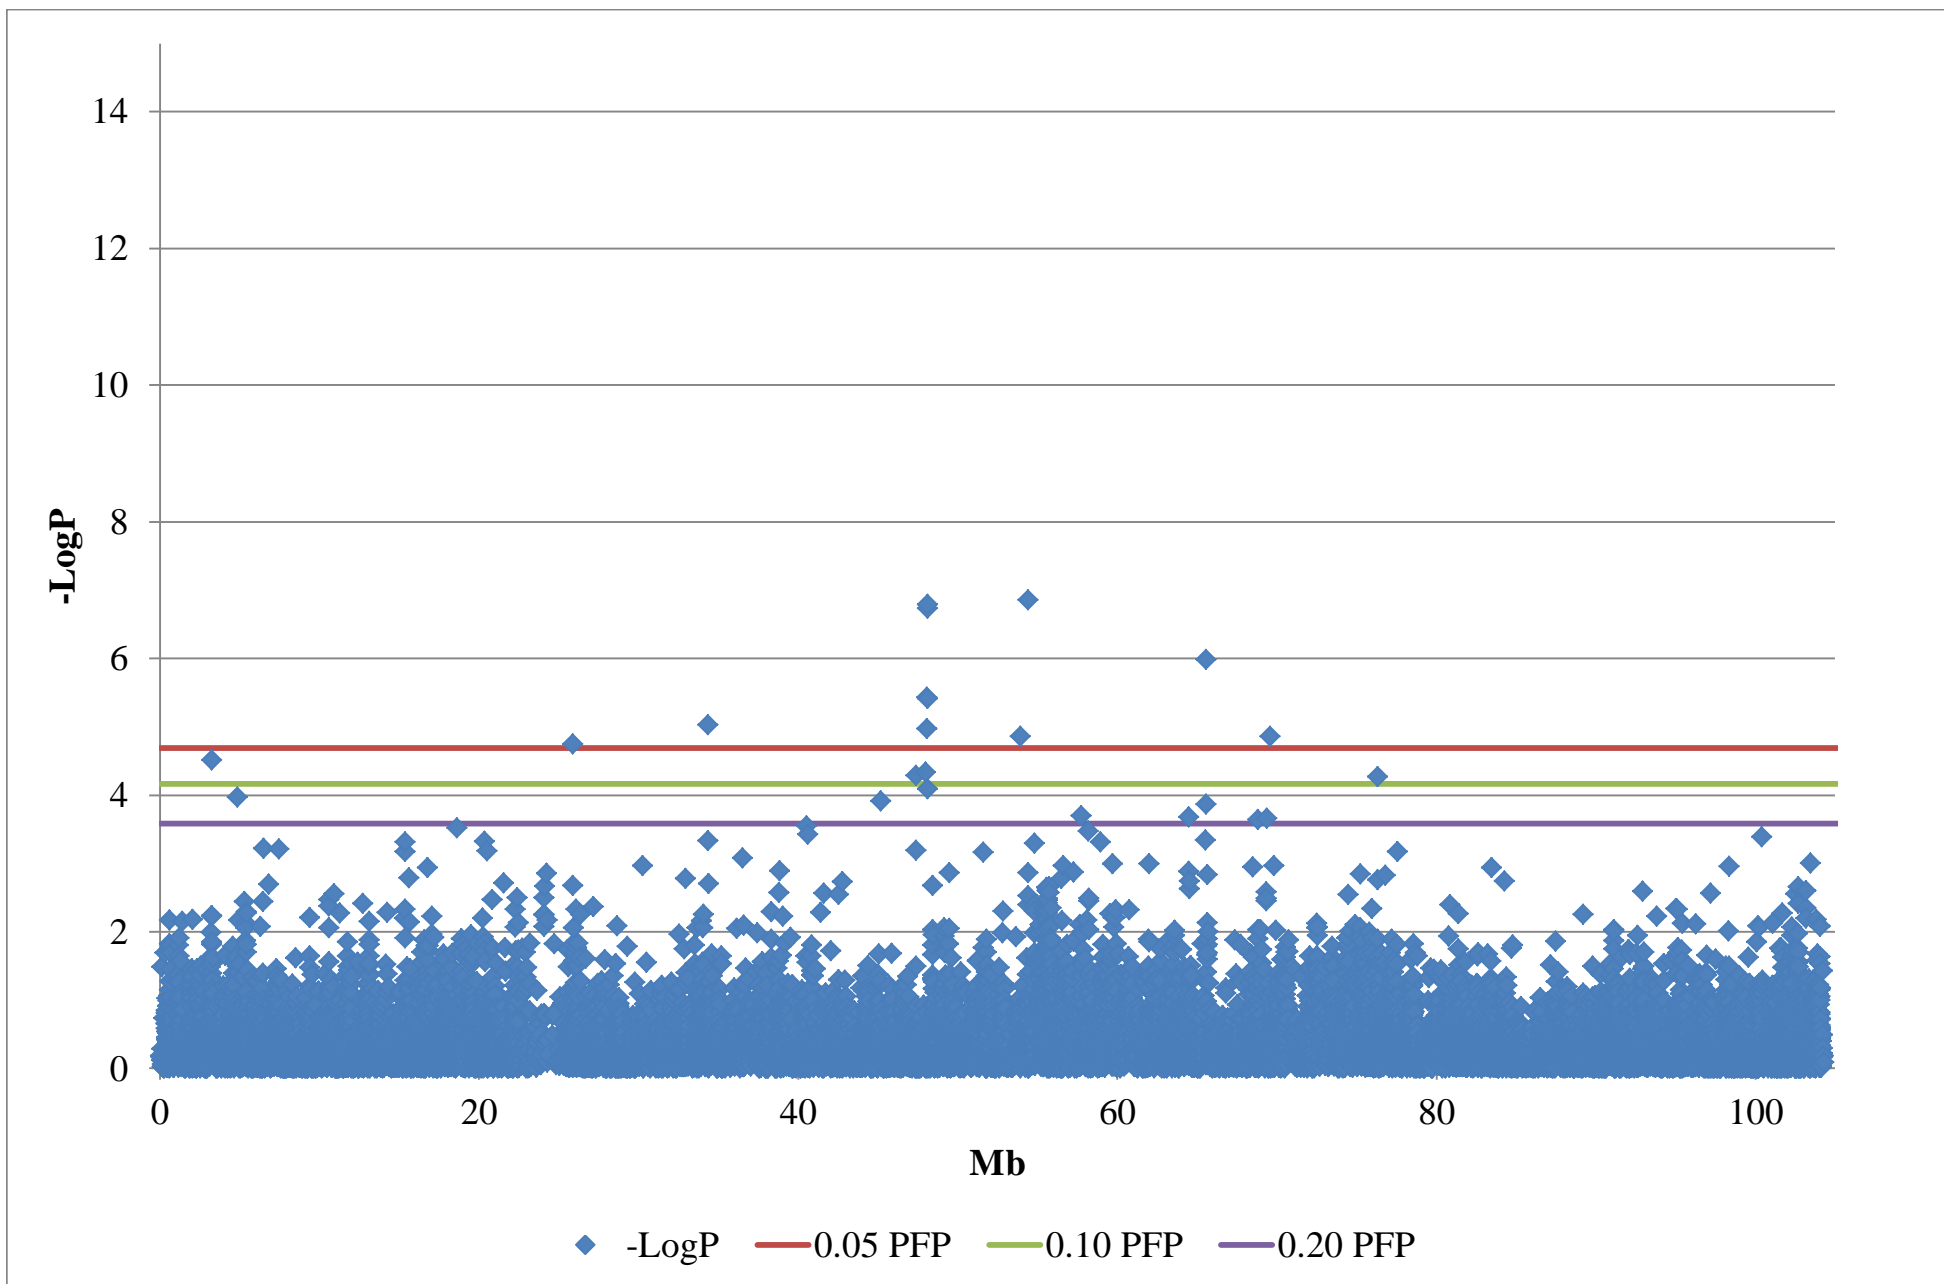

# BTA 11

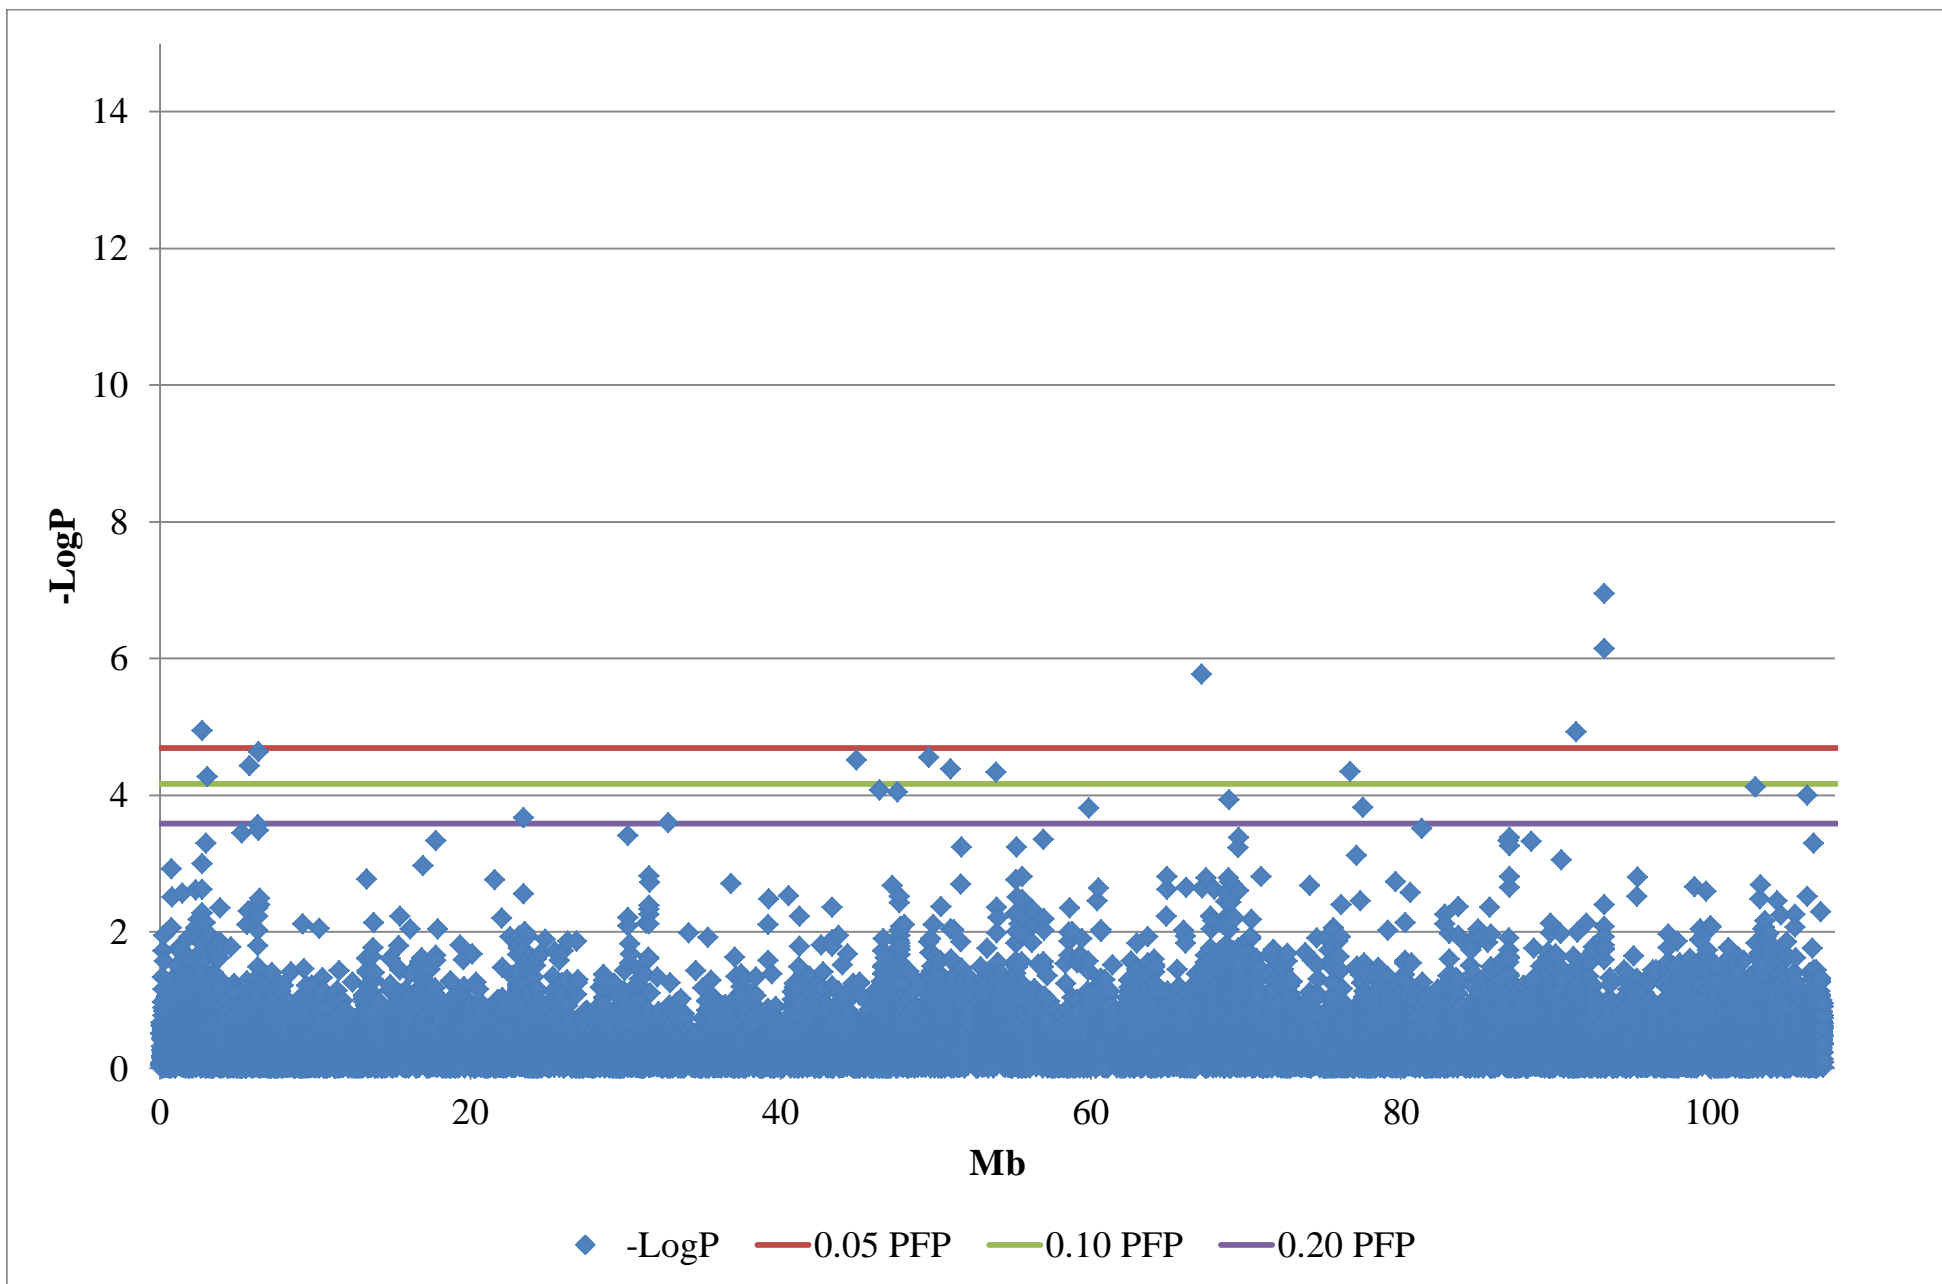

BTA 12

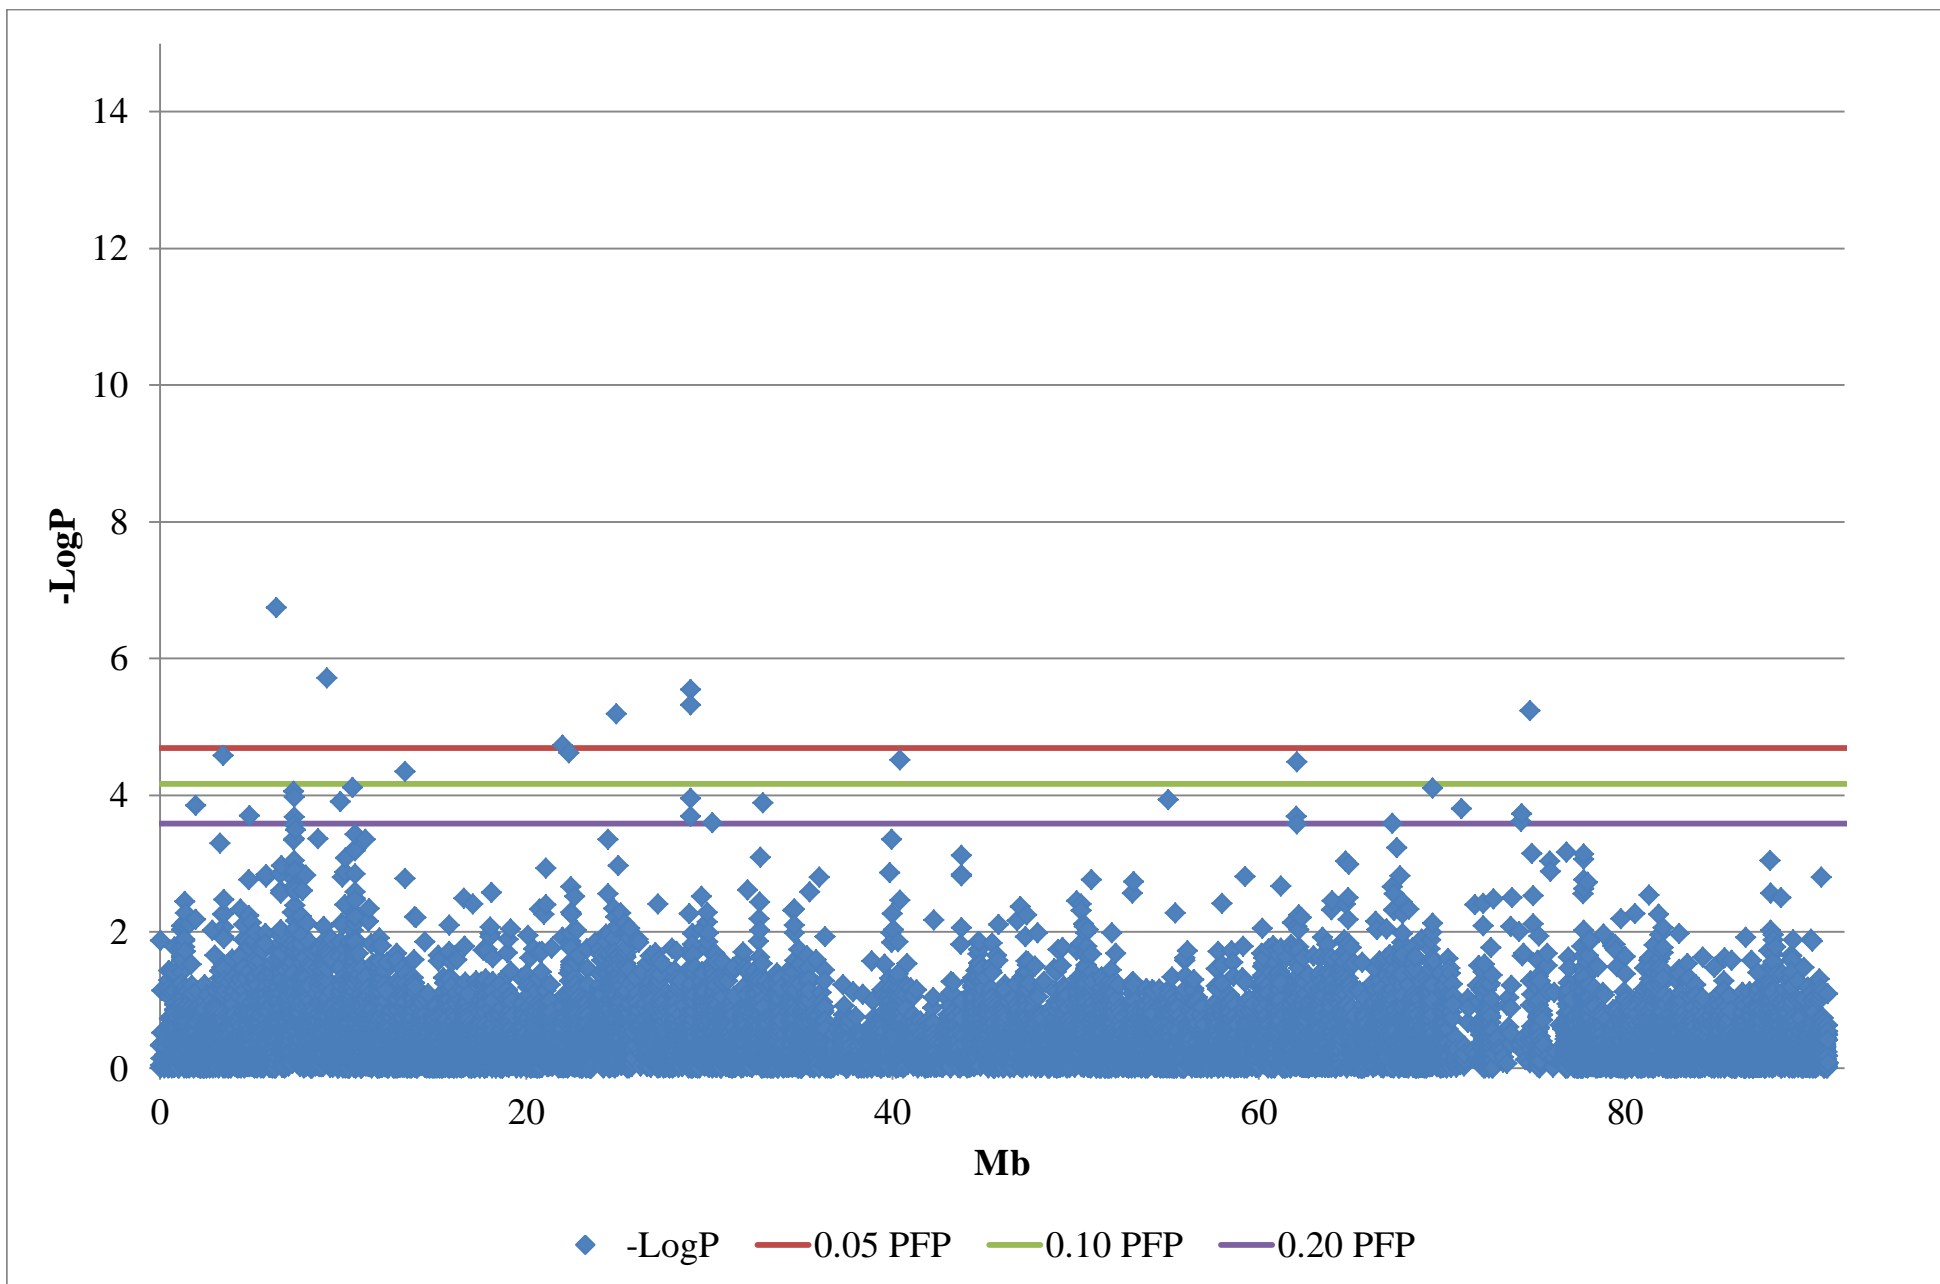

BTA 13

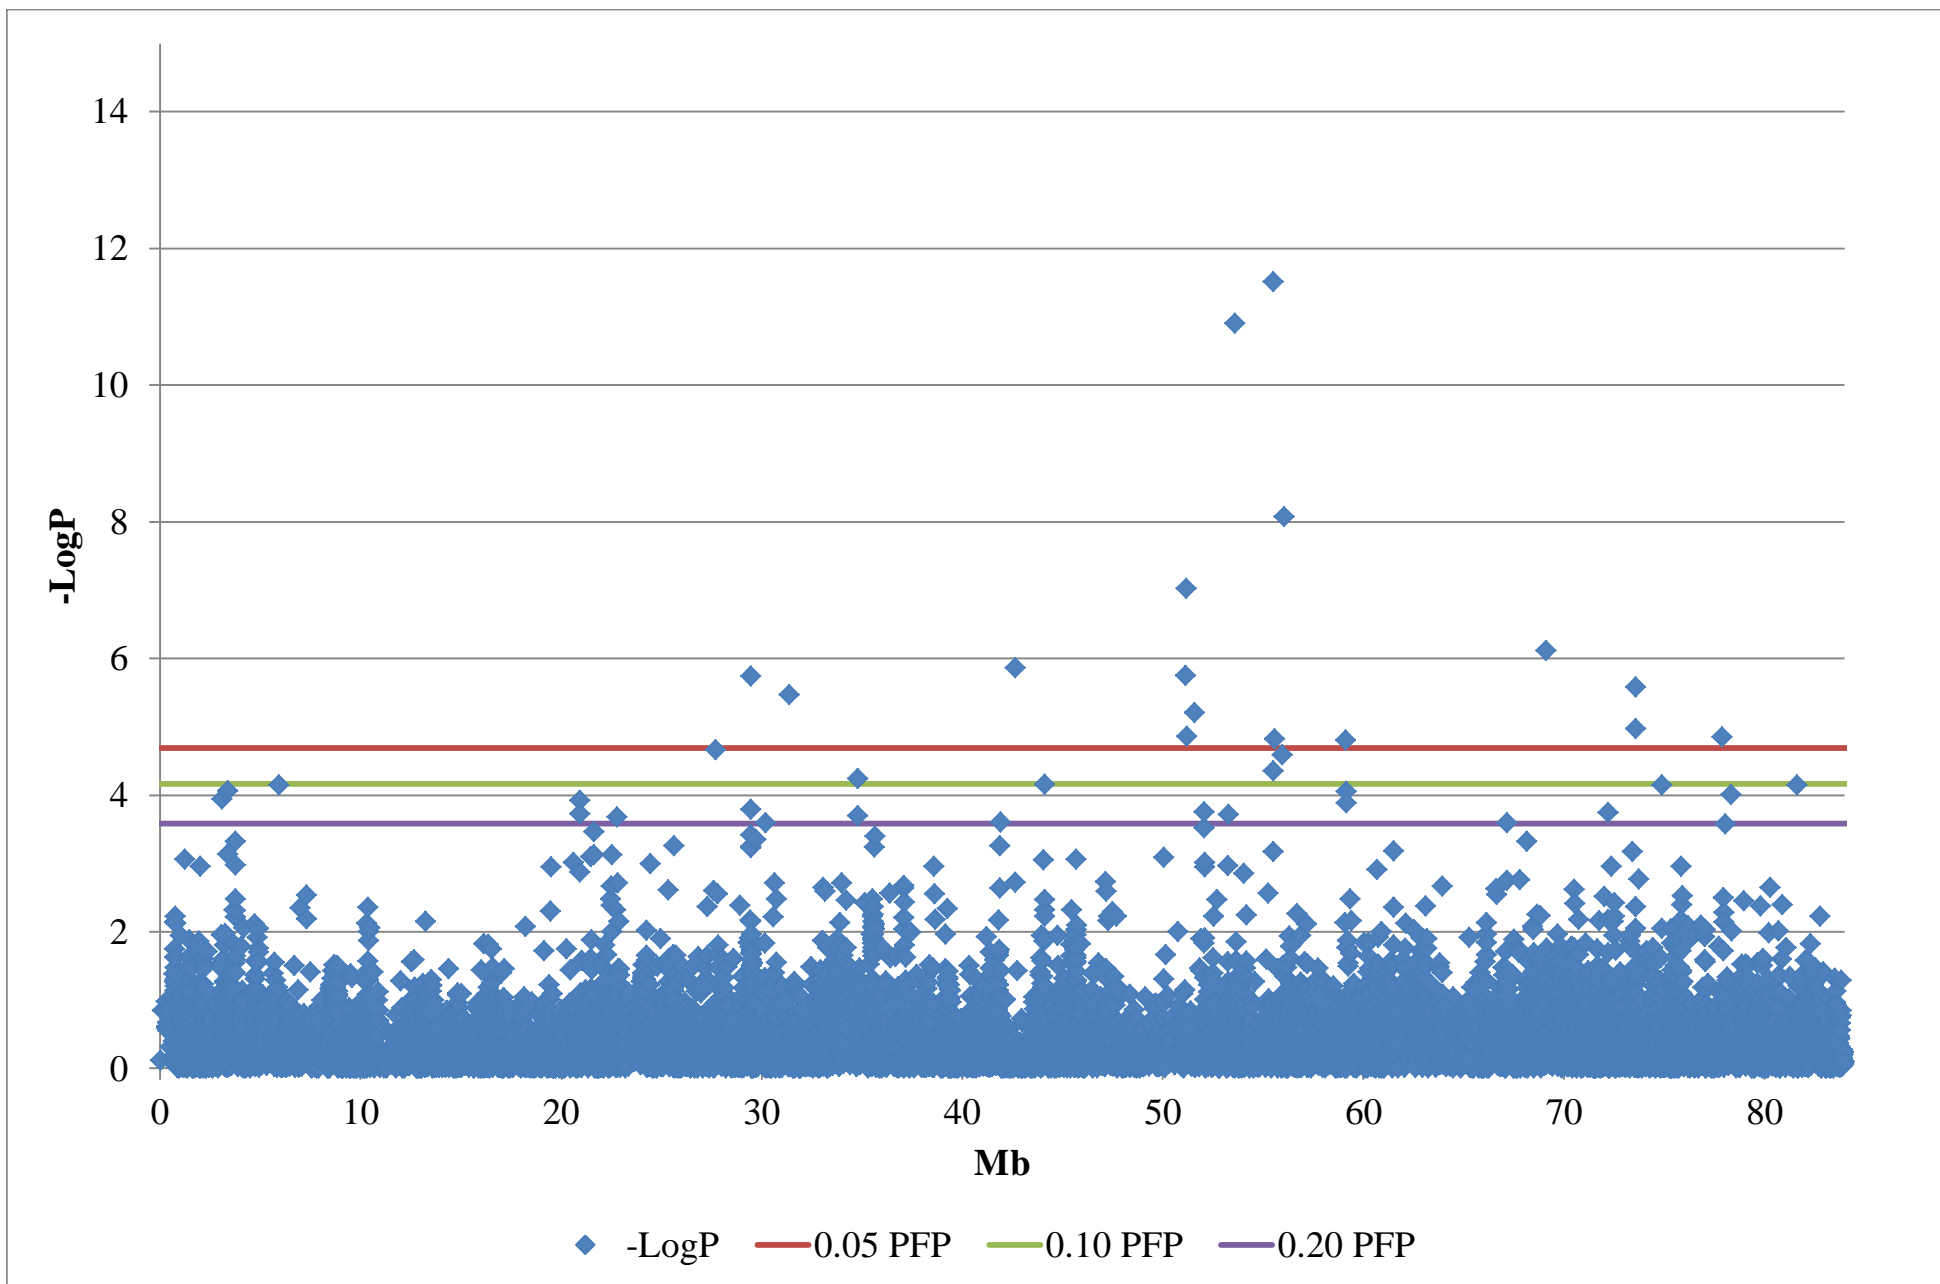

BTA 14

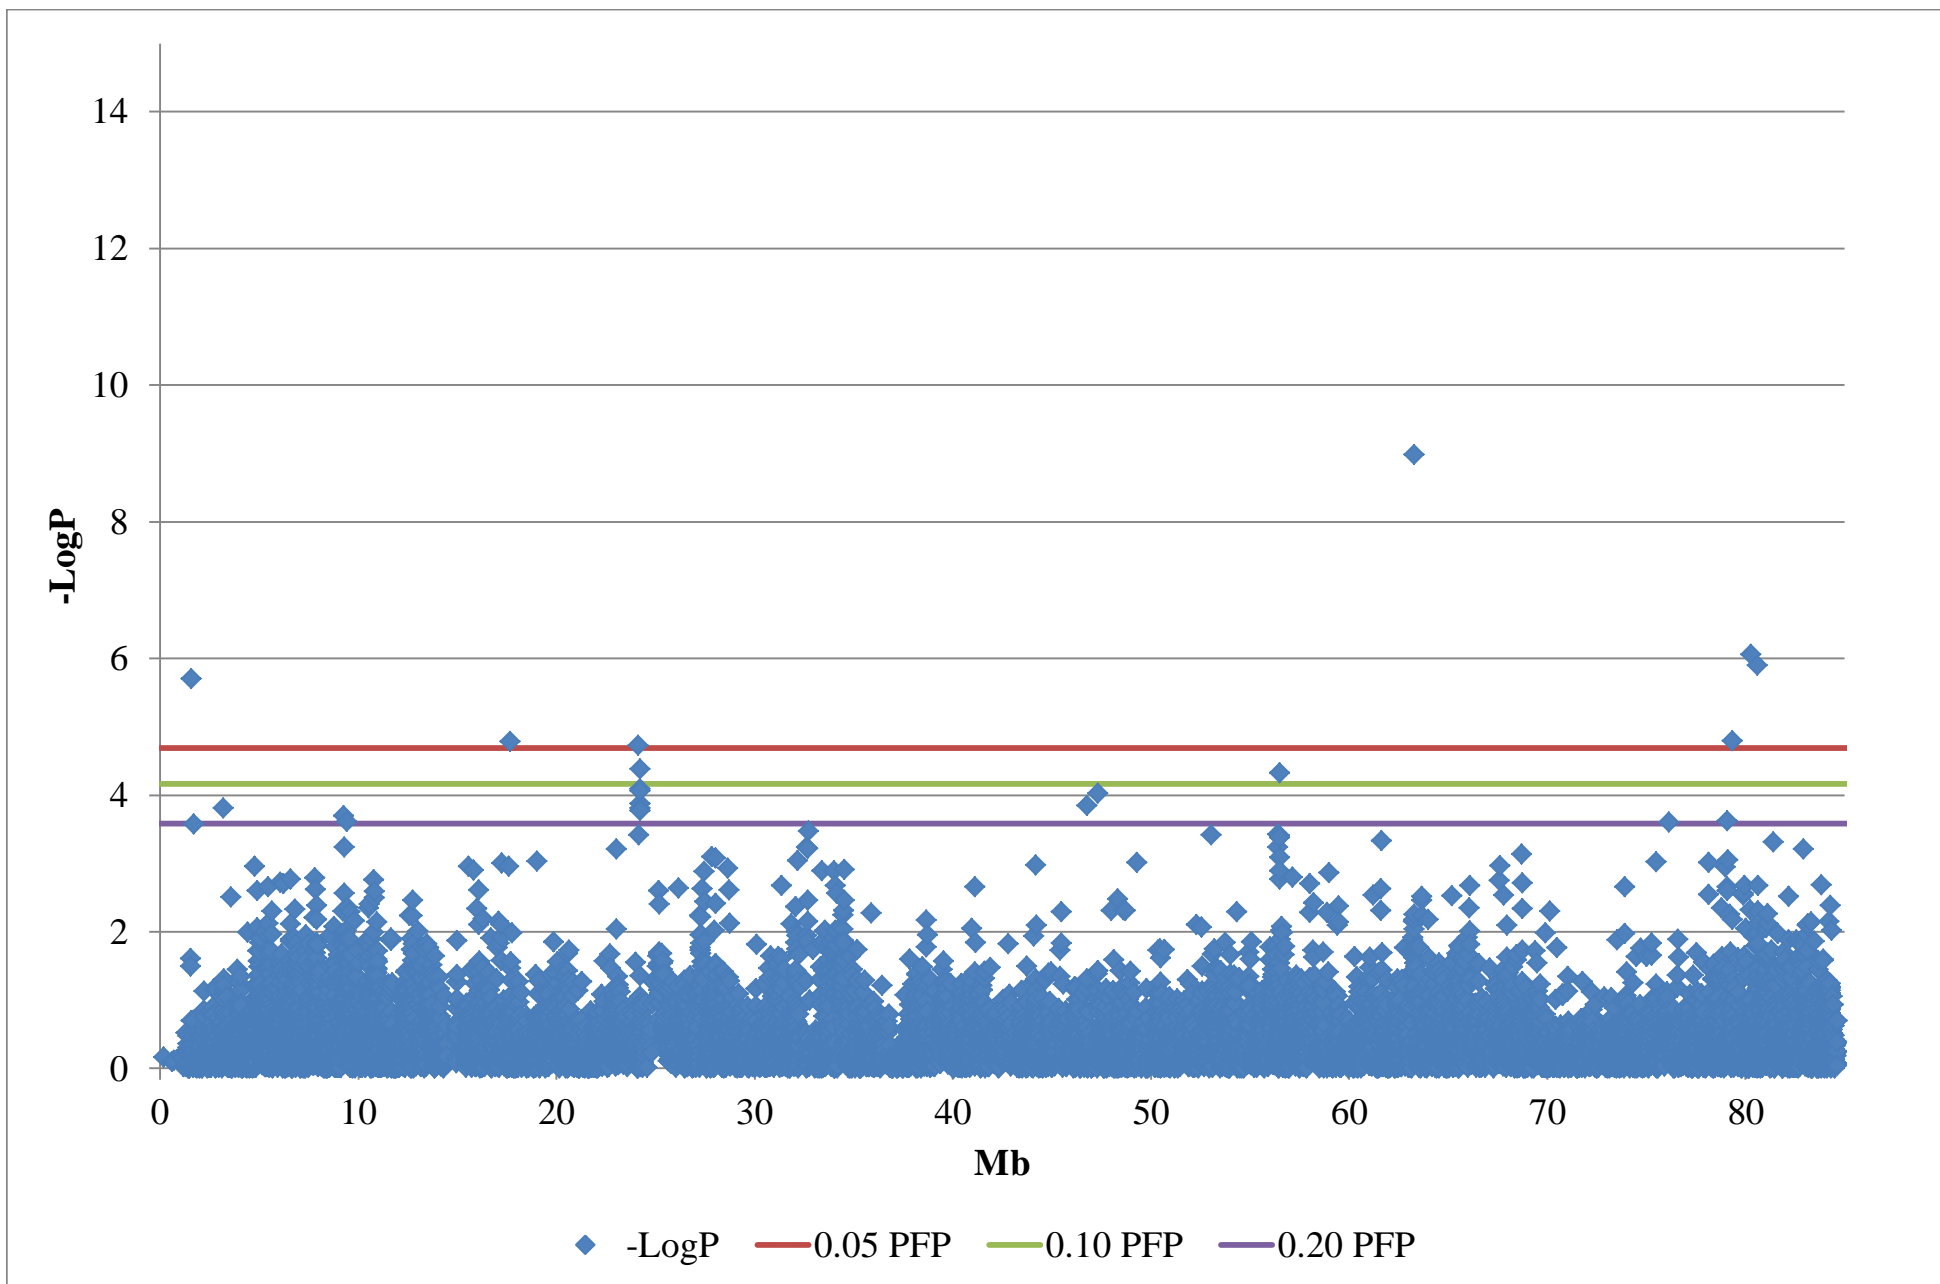

BTA 15

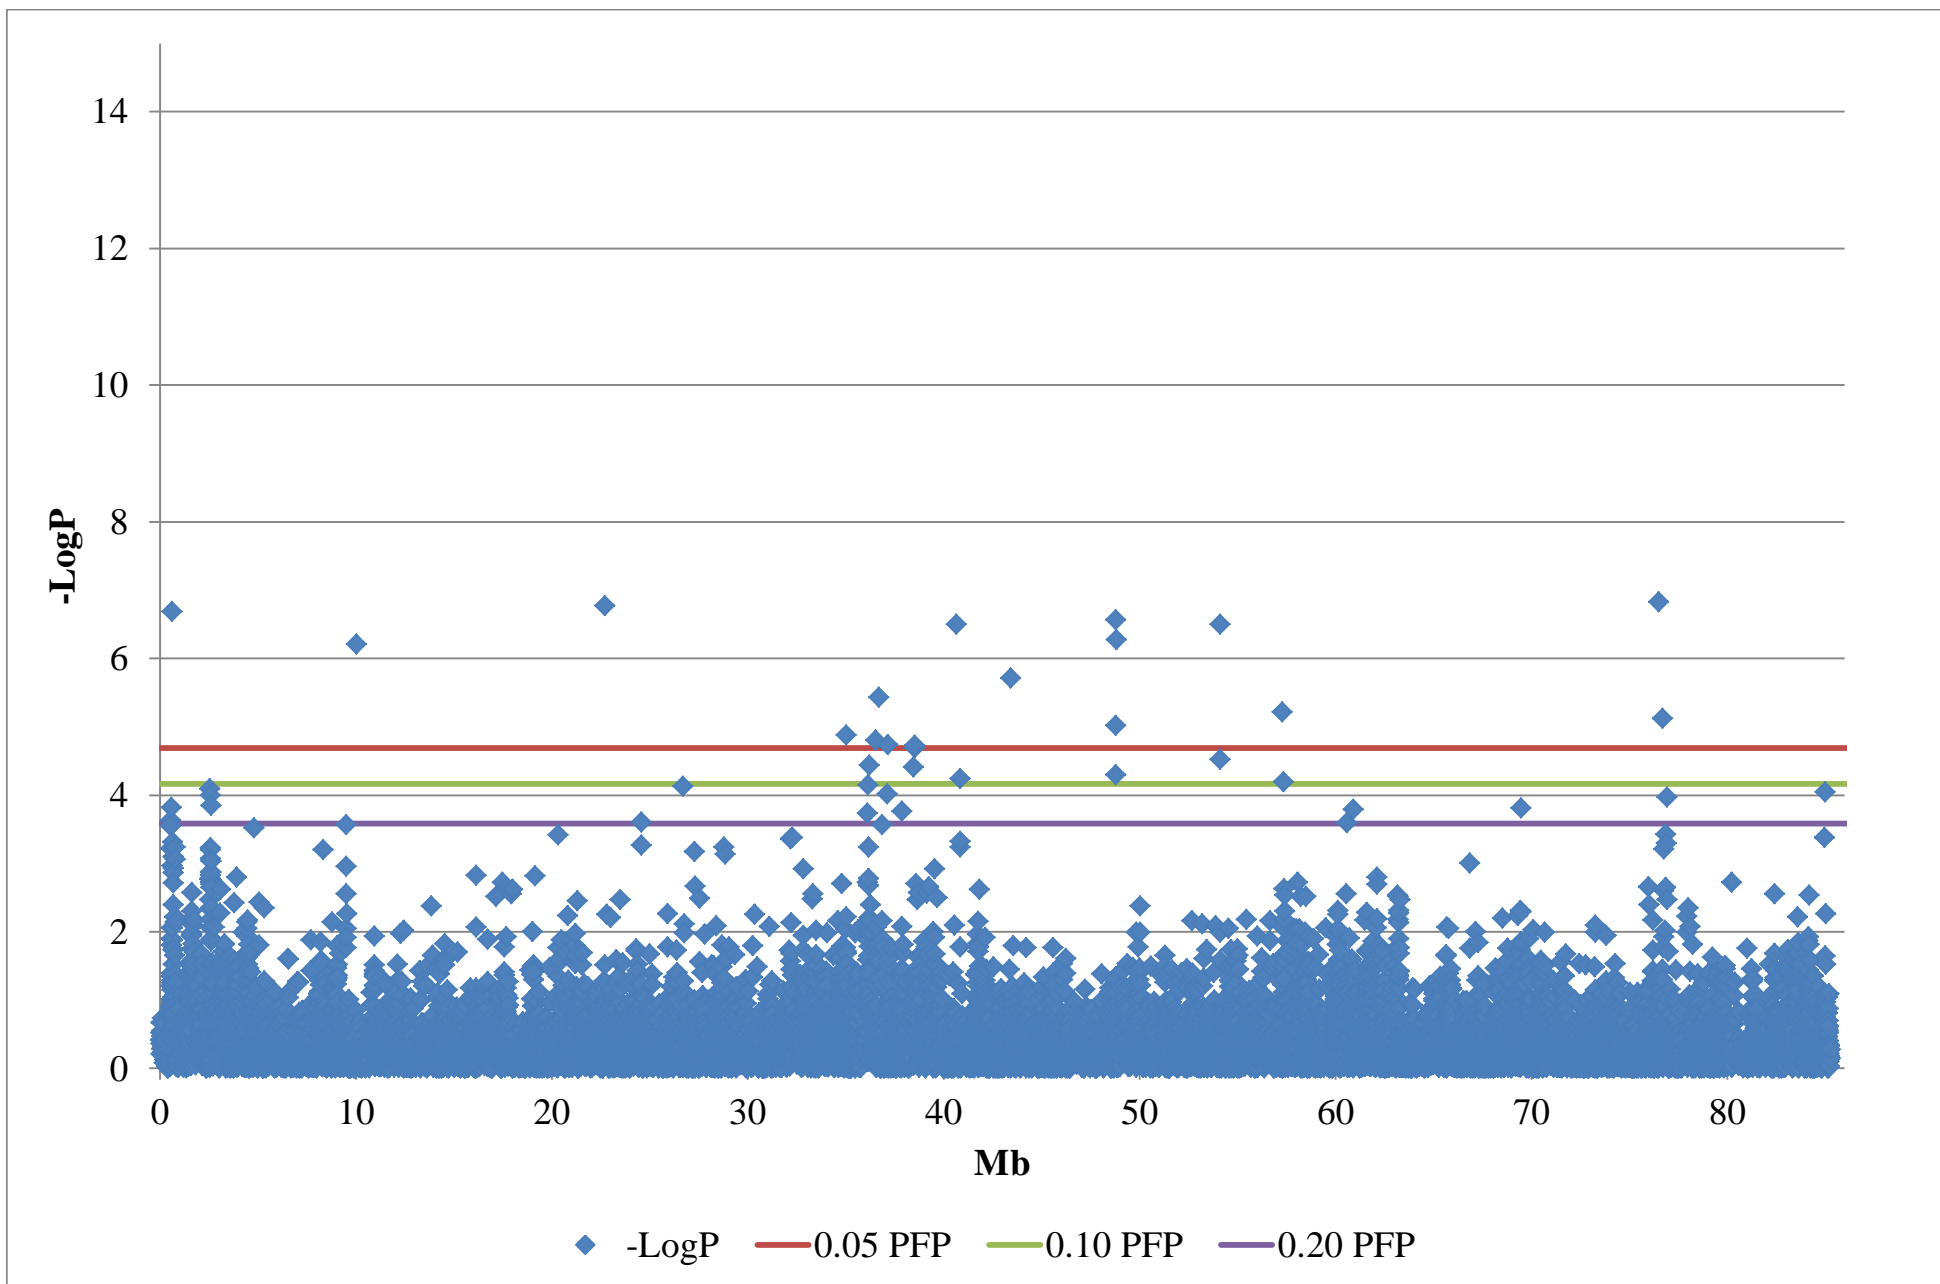

BTA 16

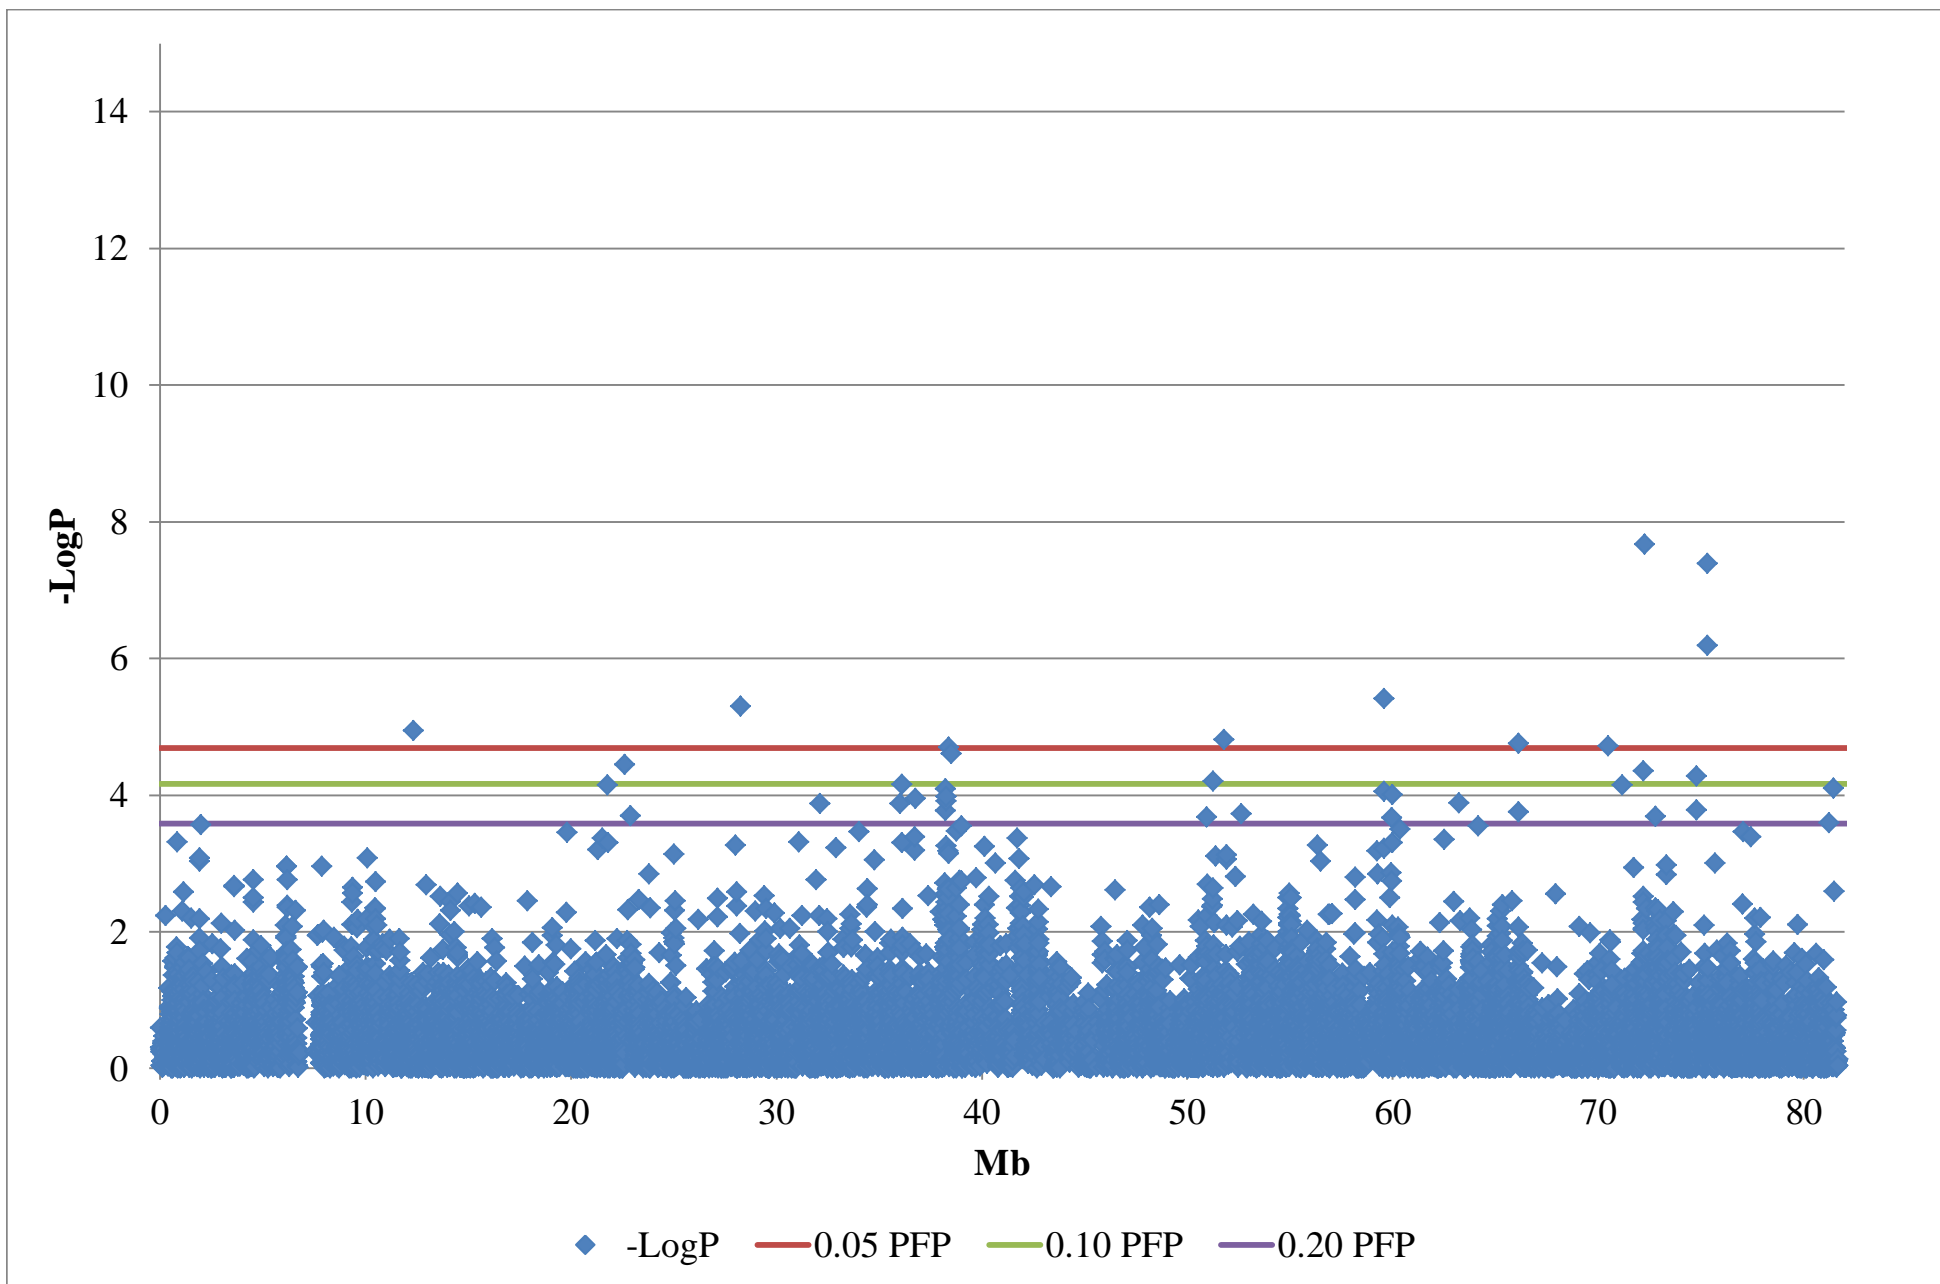



BTA 17

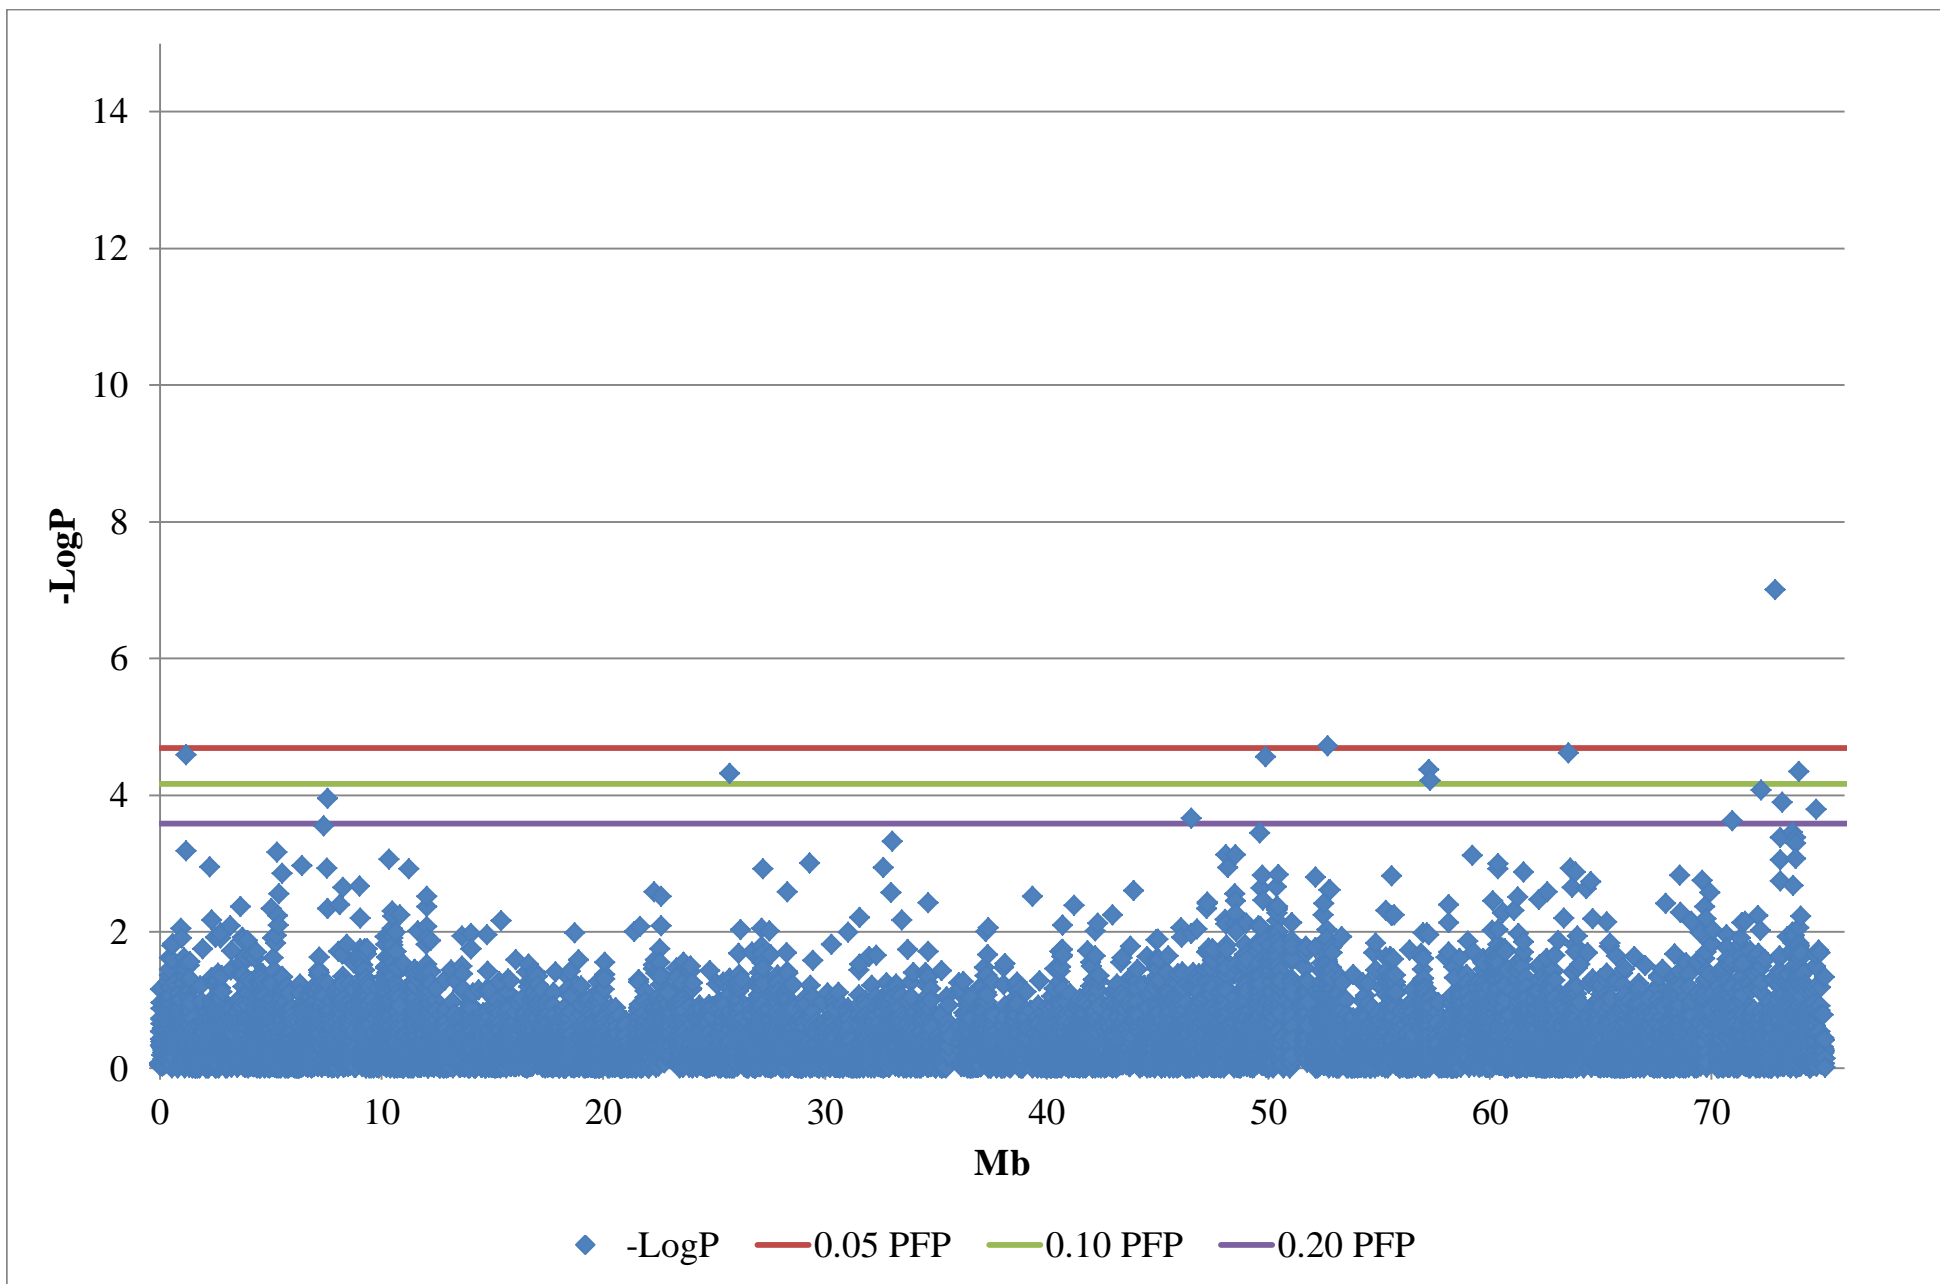

BTA 18

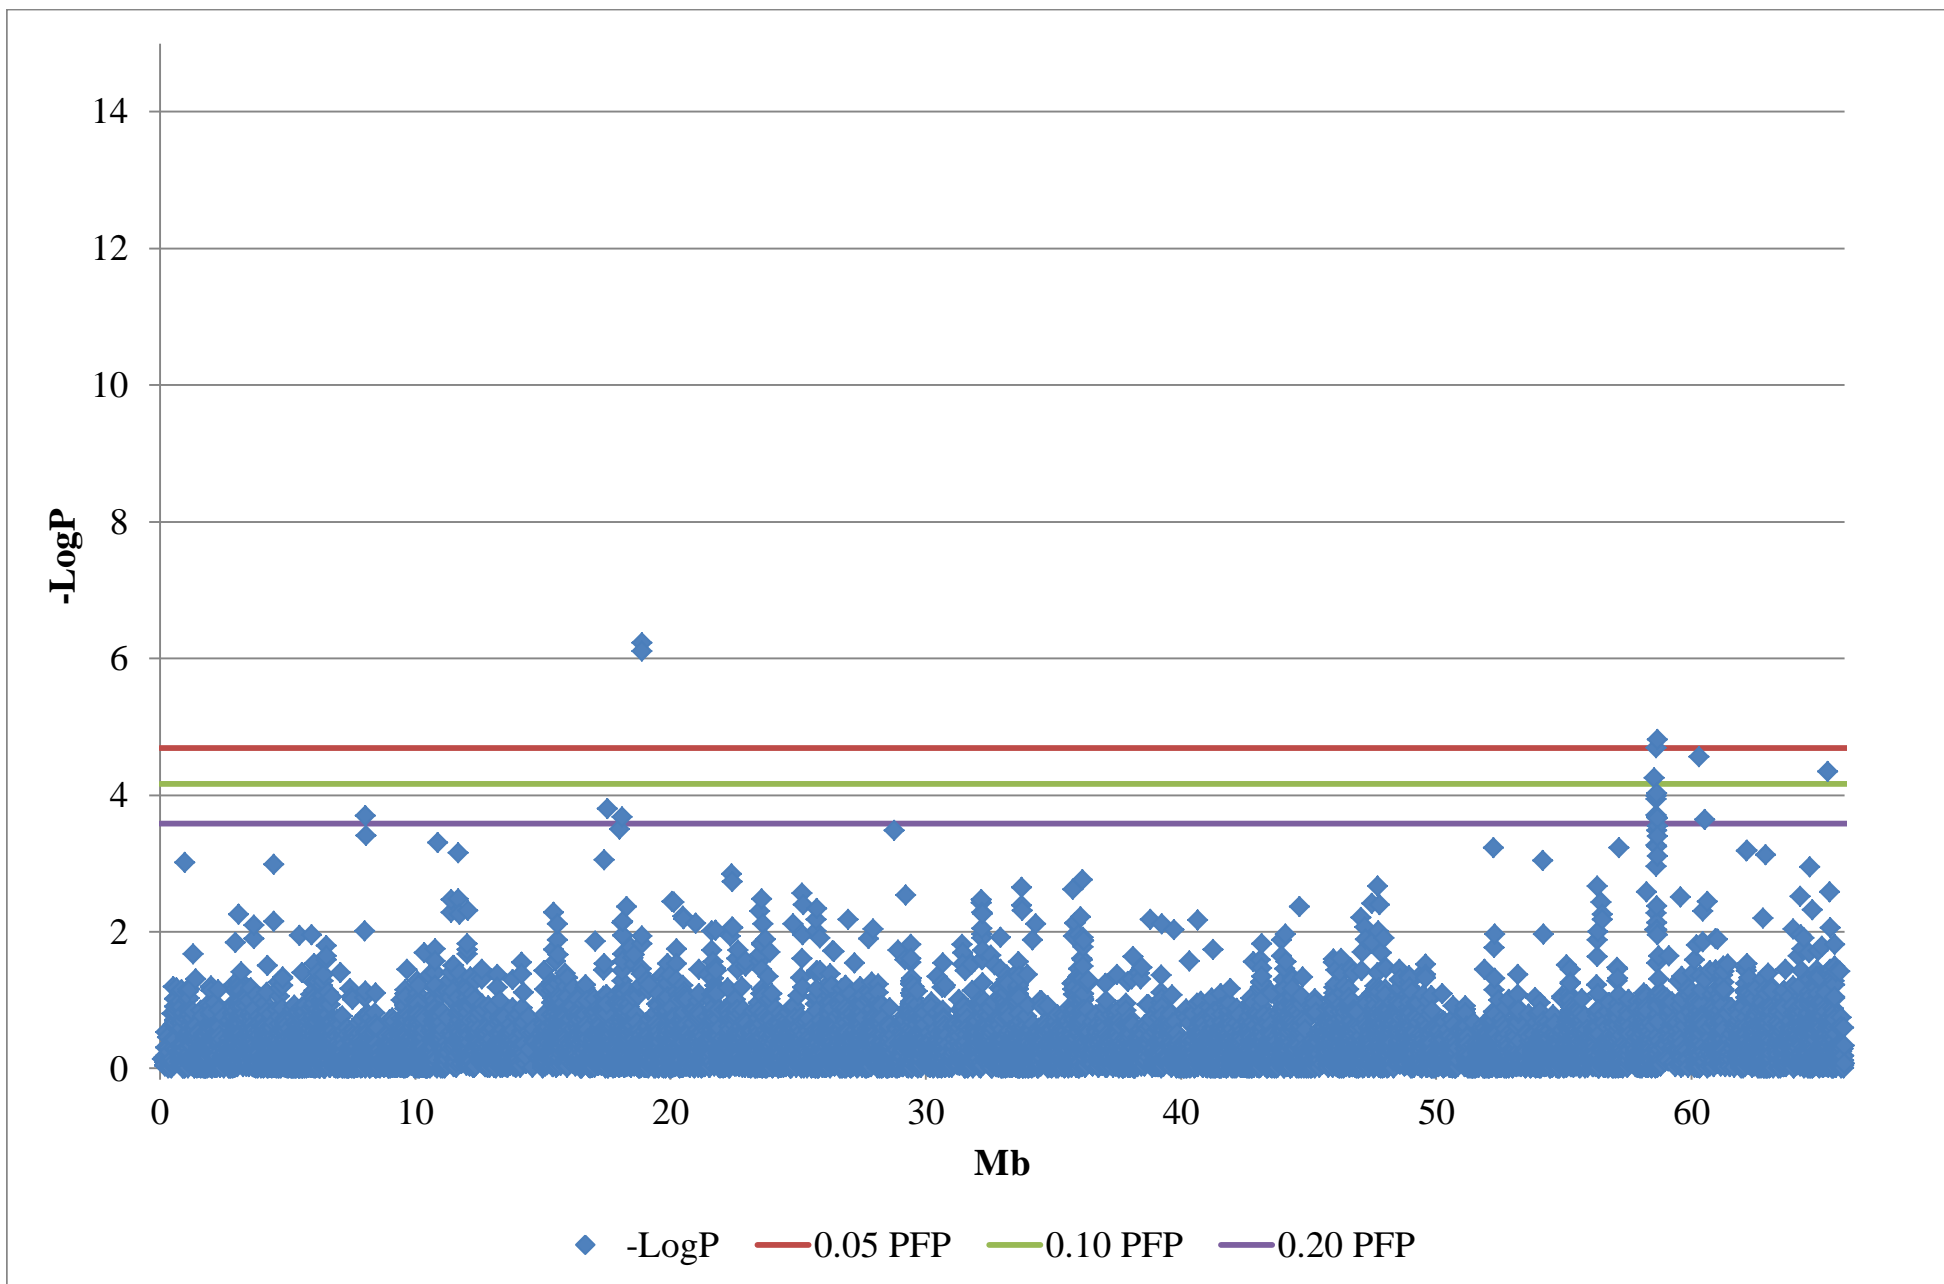

BTA 19

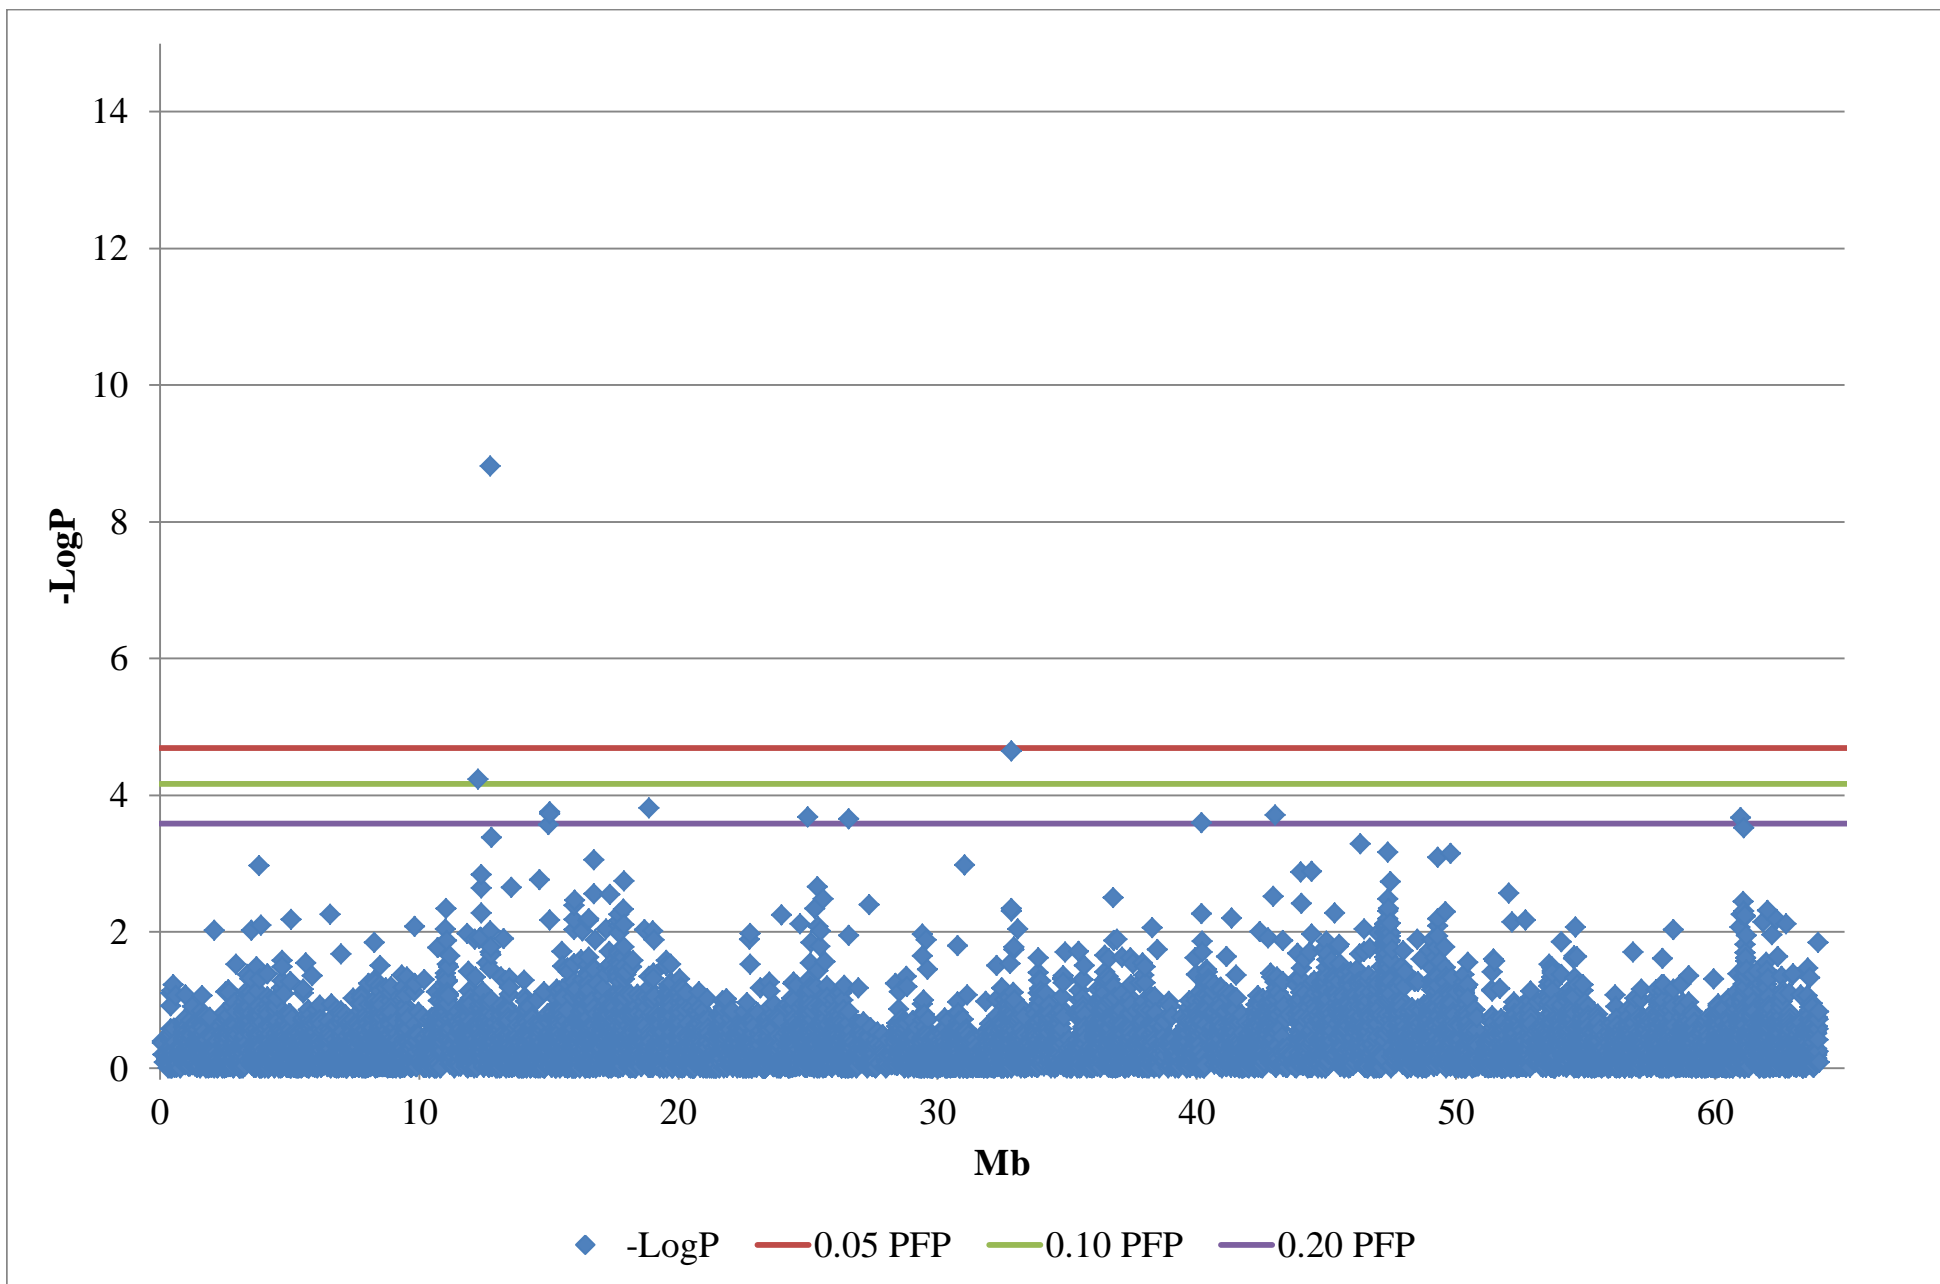

**BTA 20**

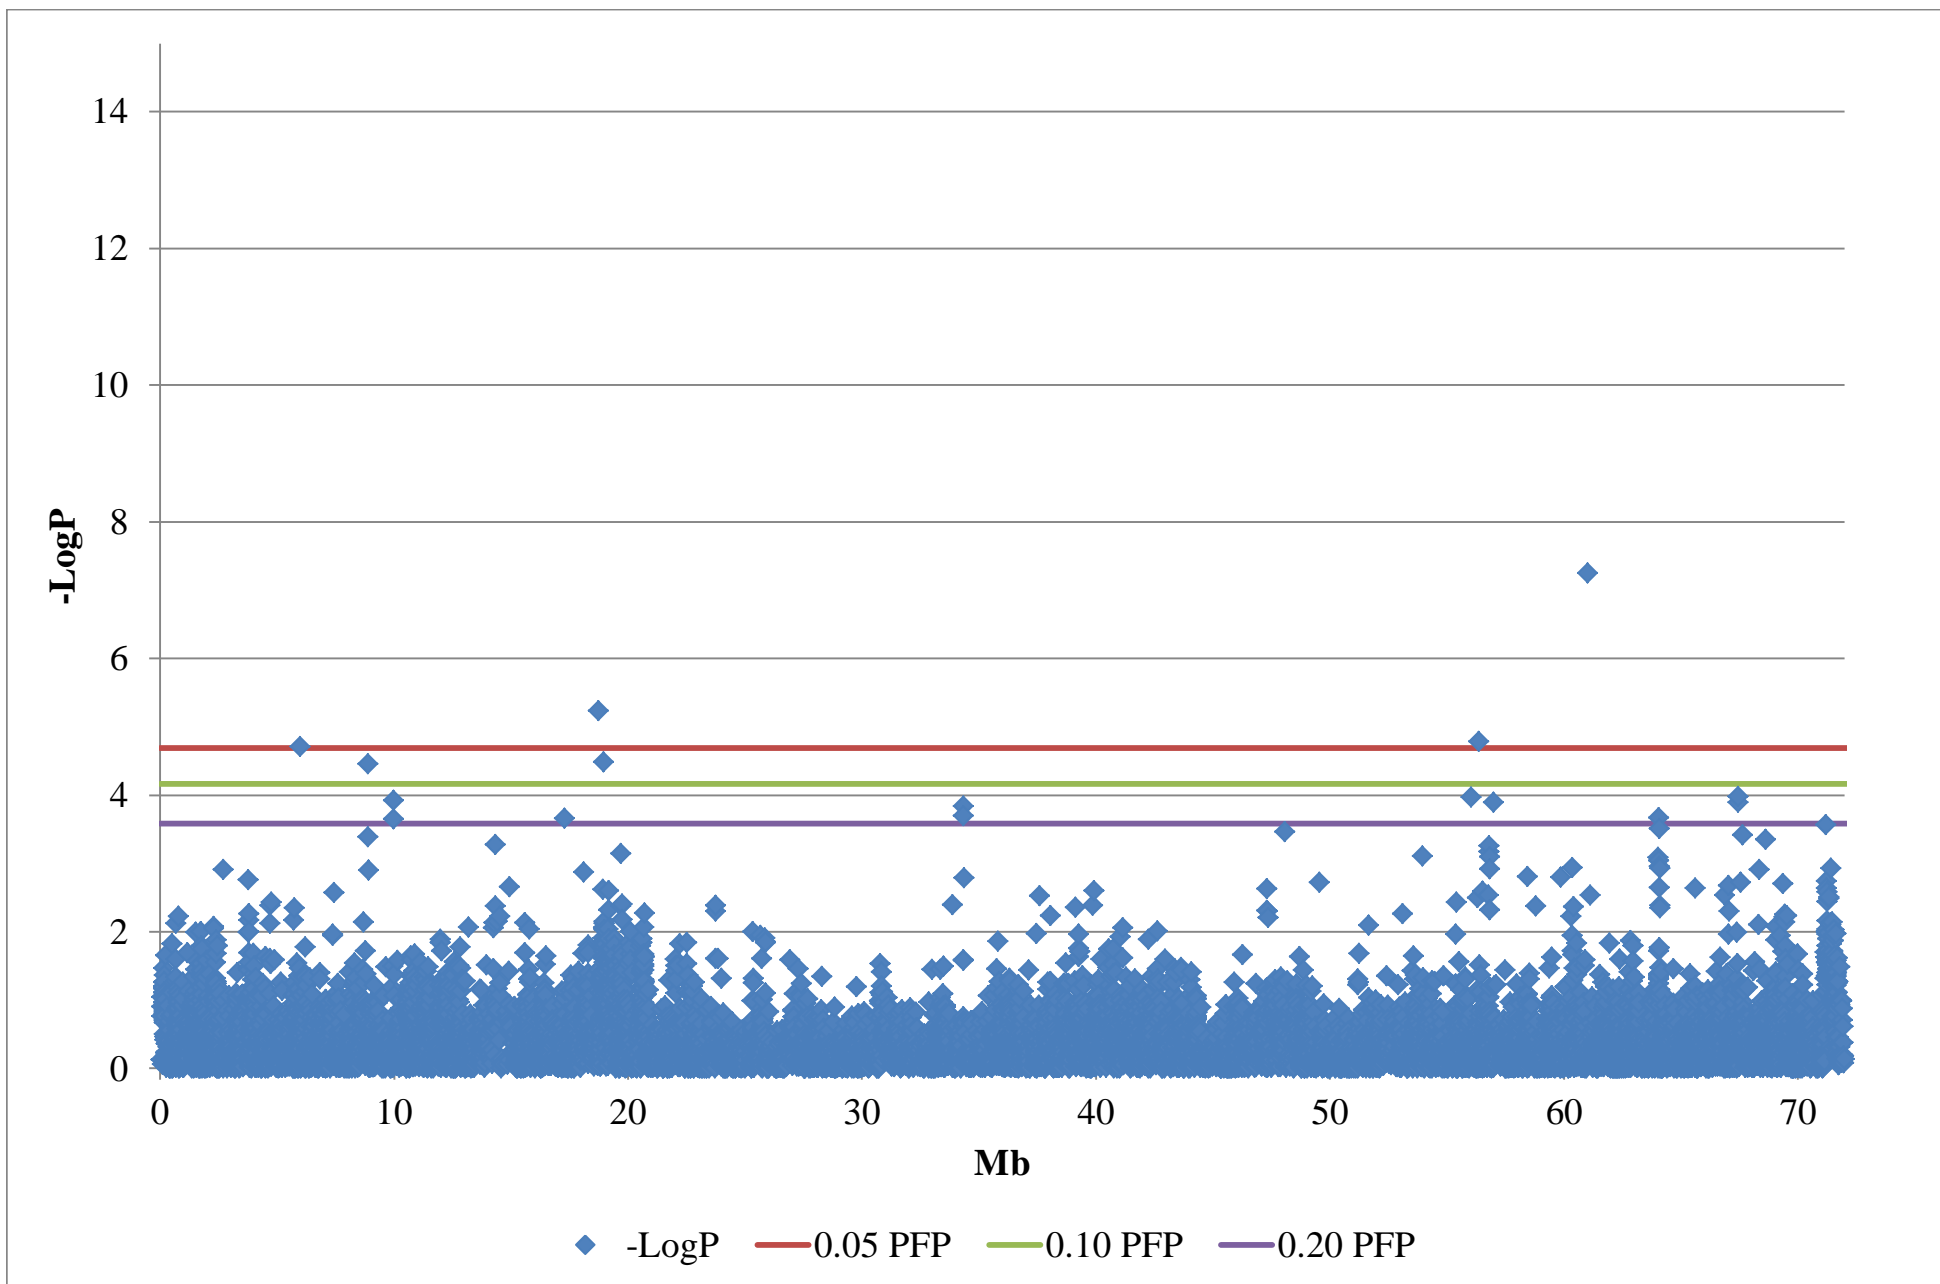

**BTA 21**

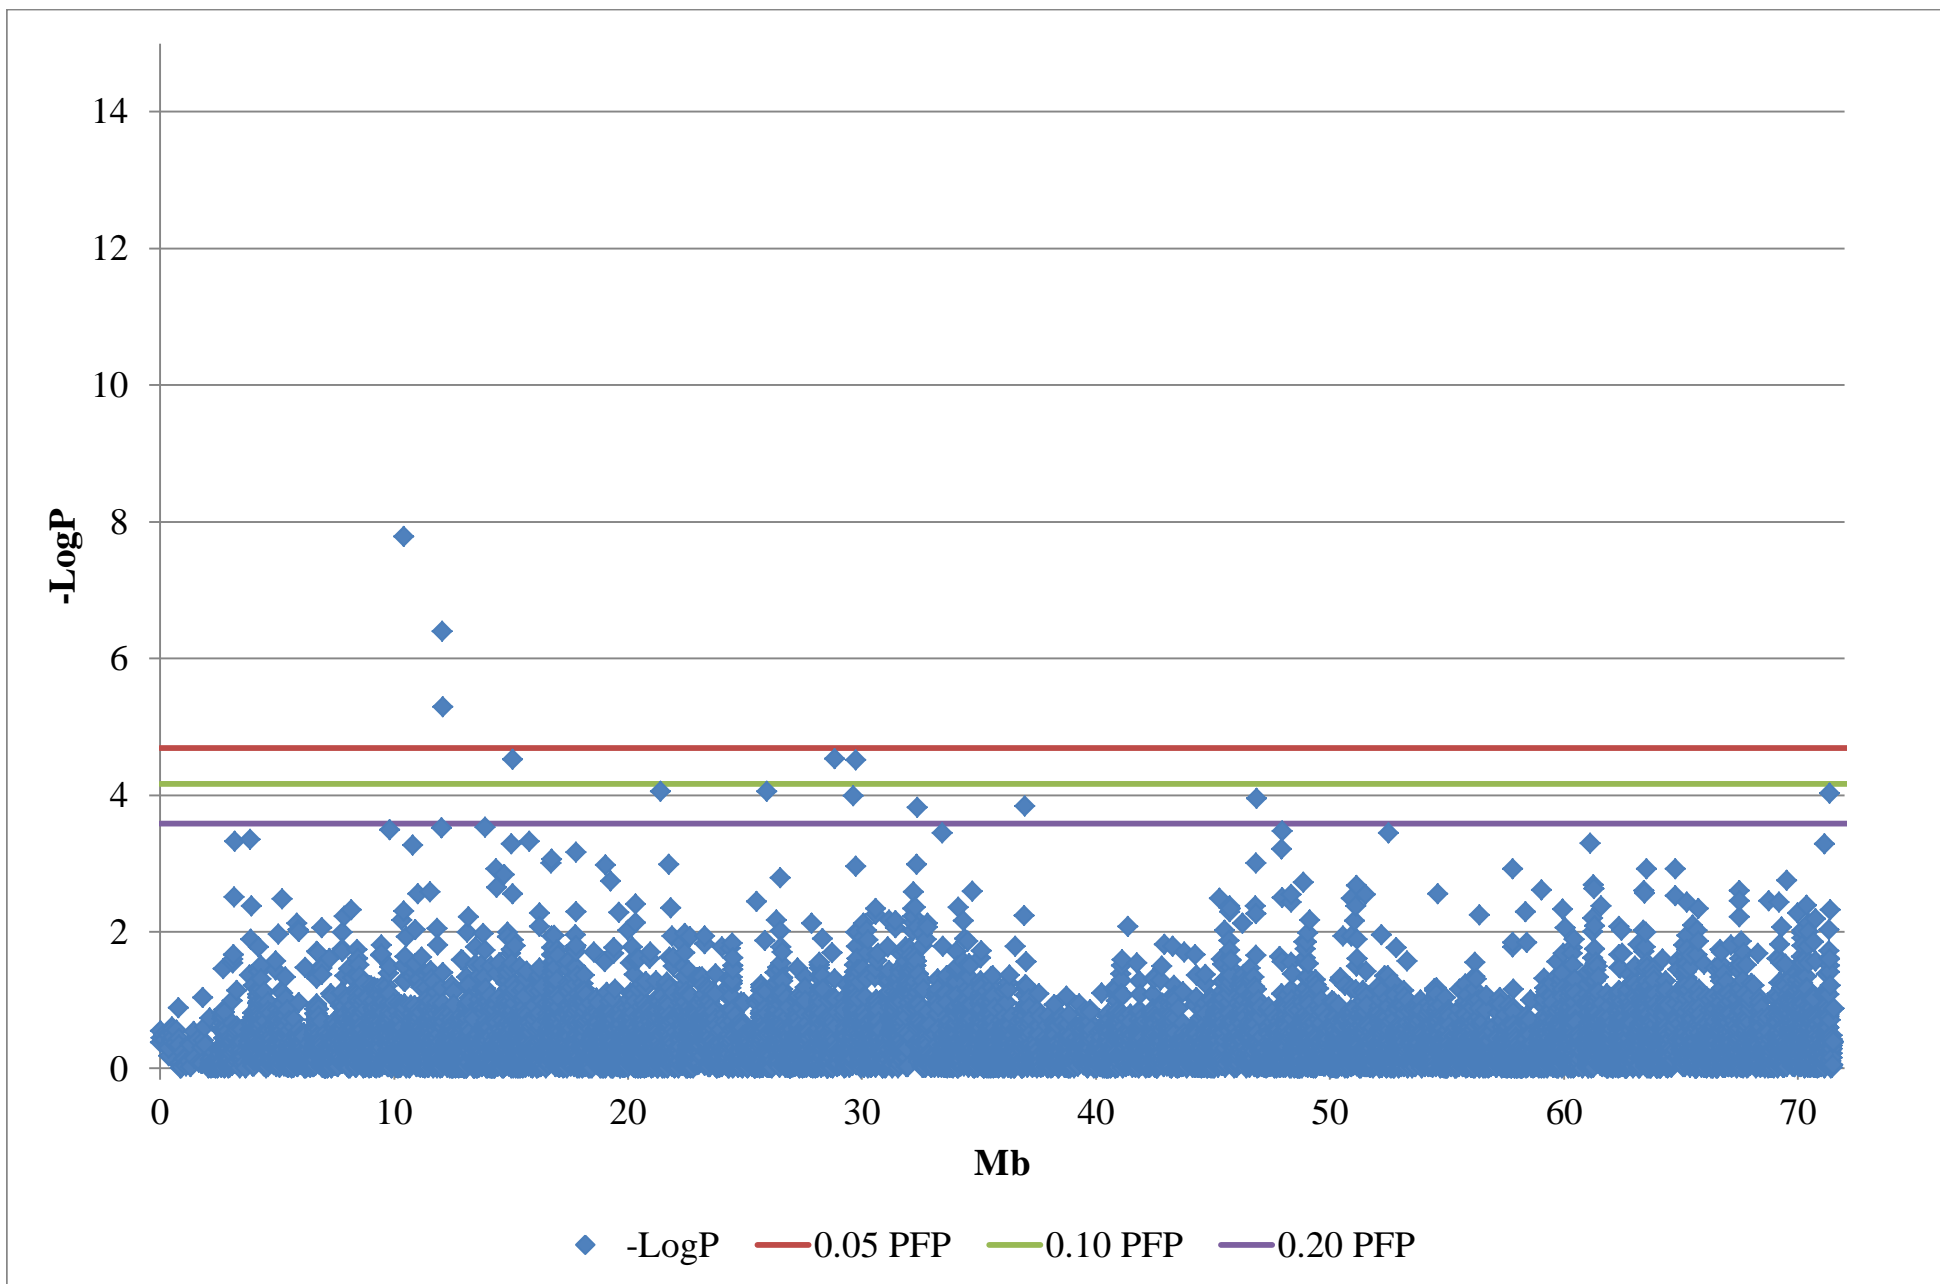

BTA 22

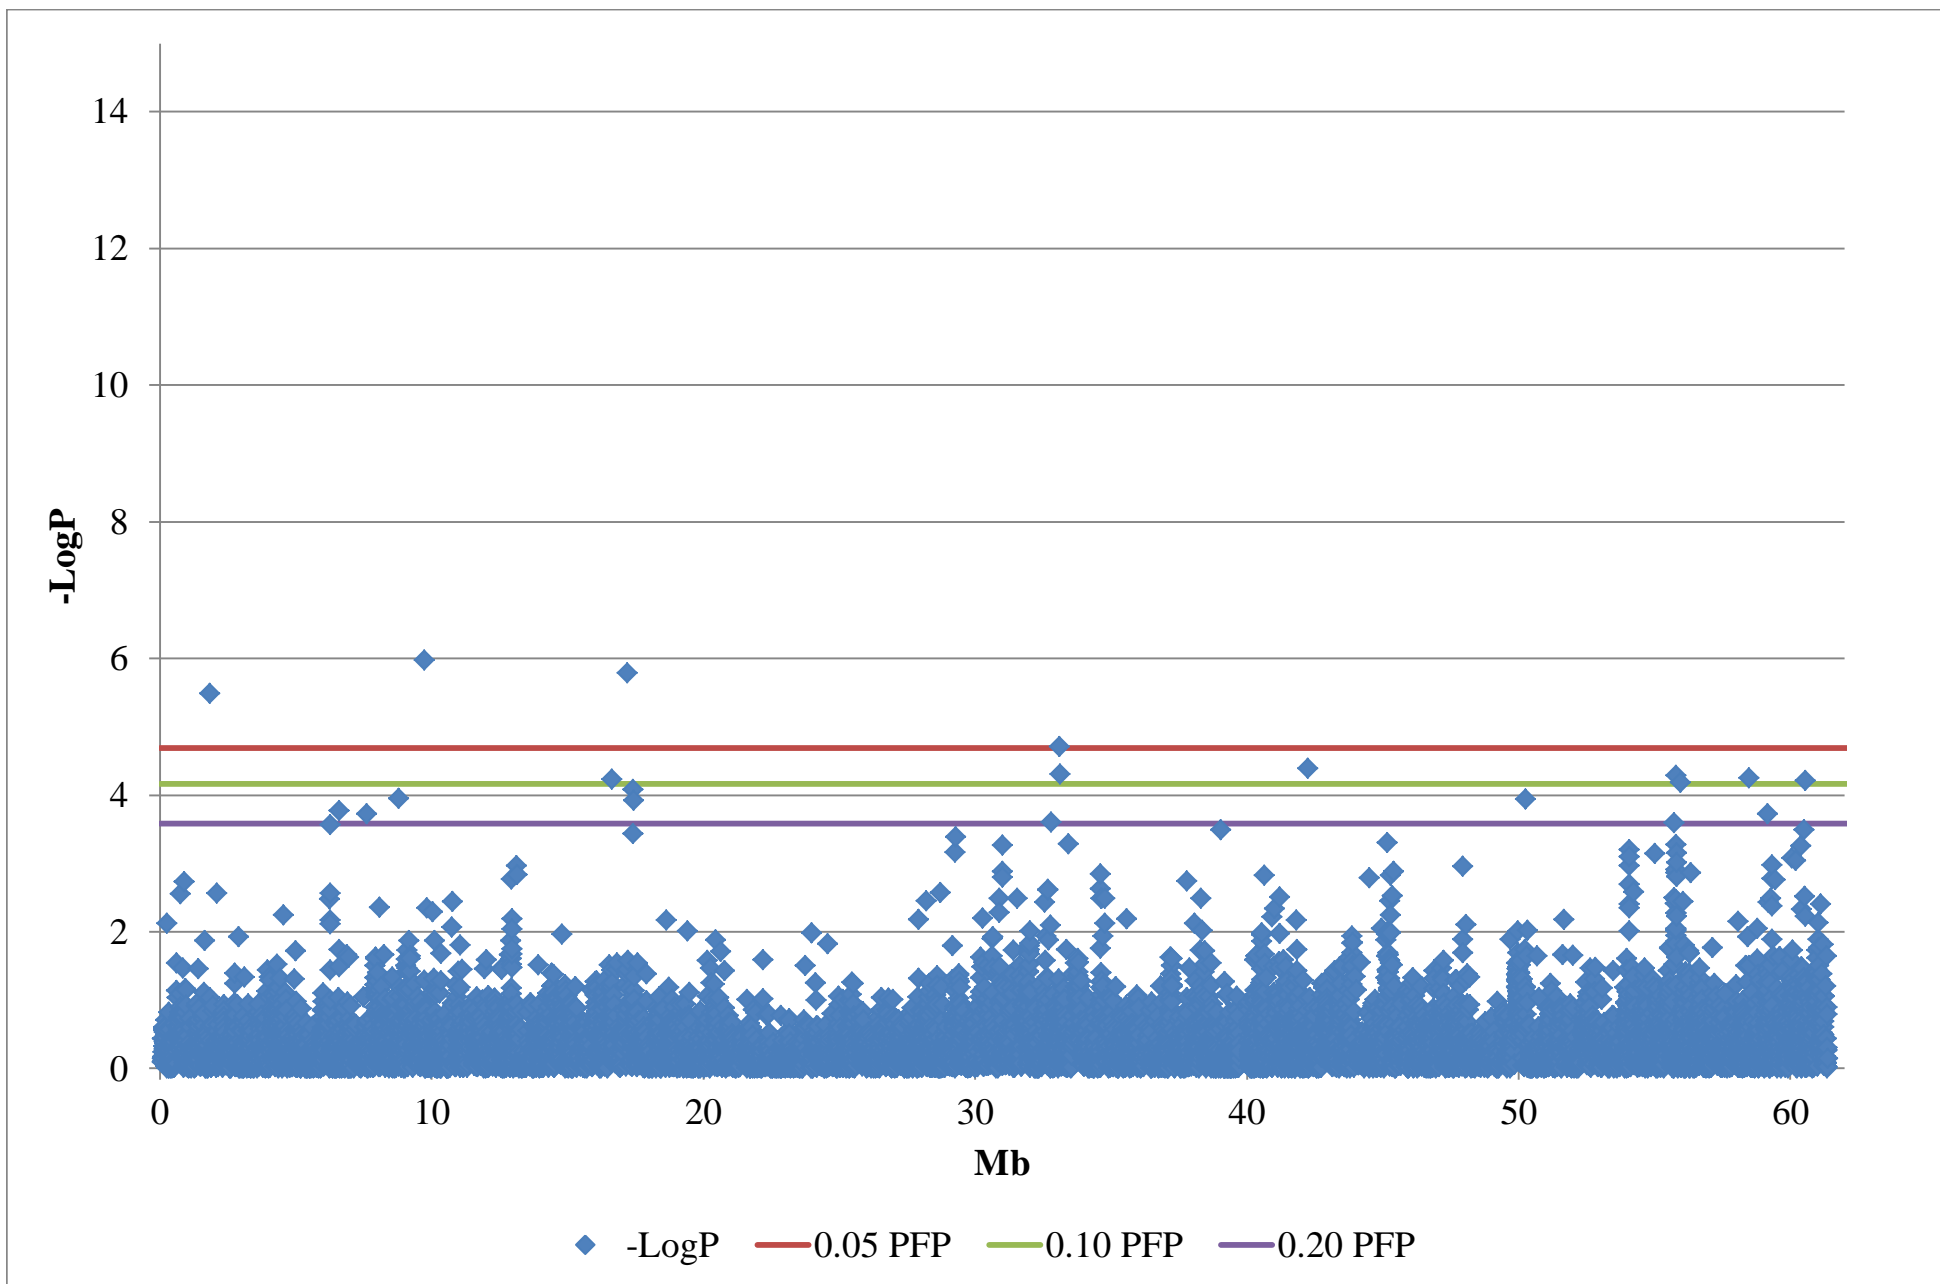

BTA 23

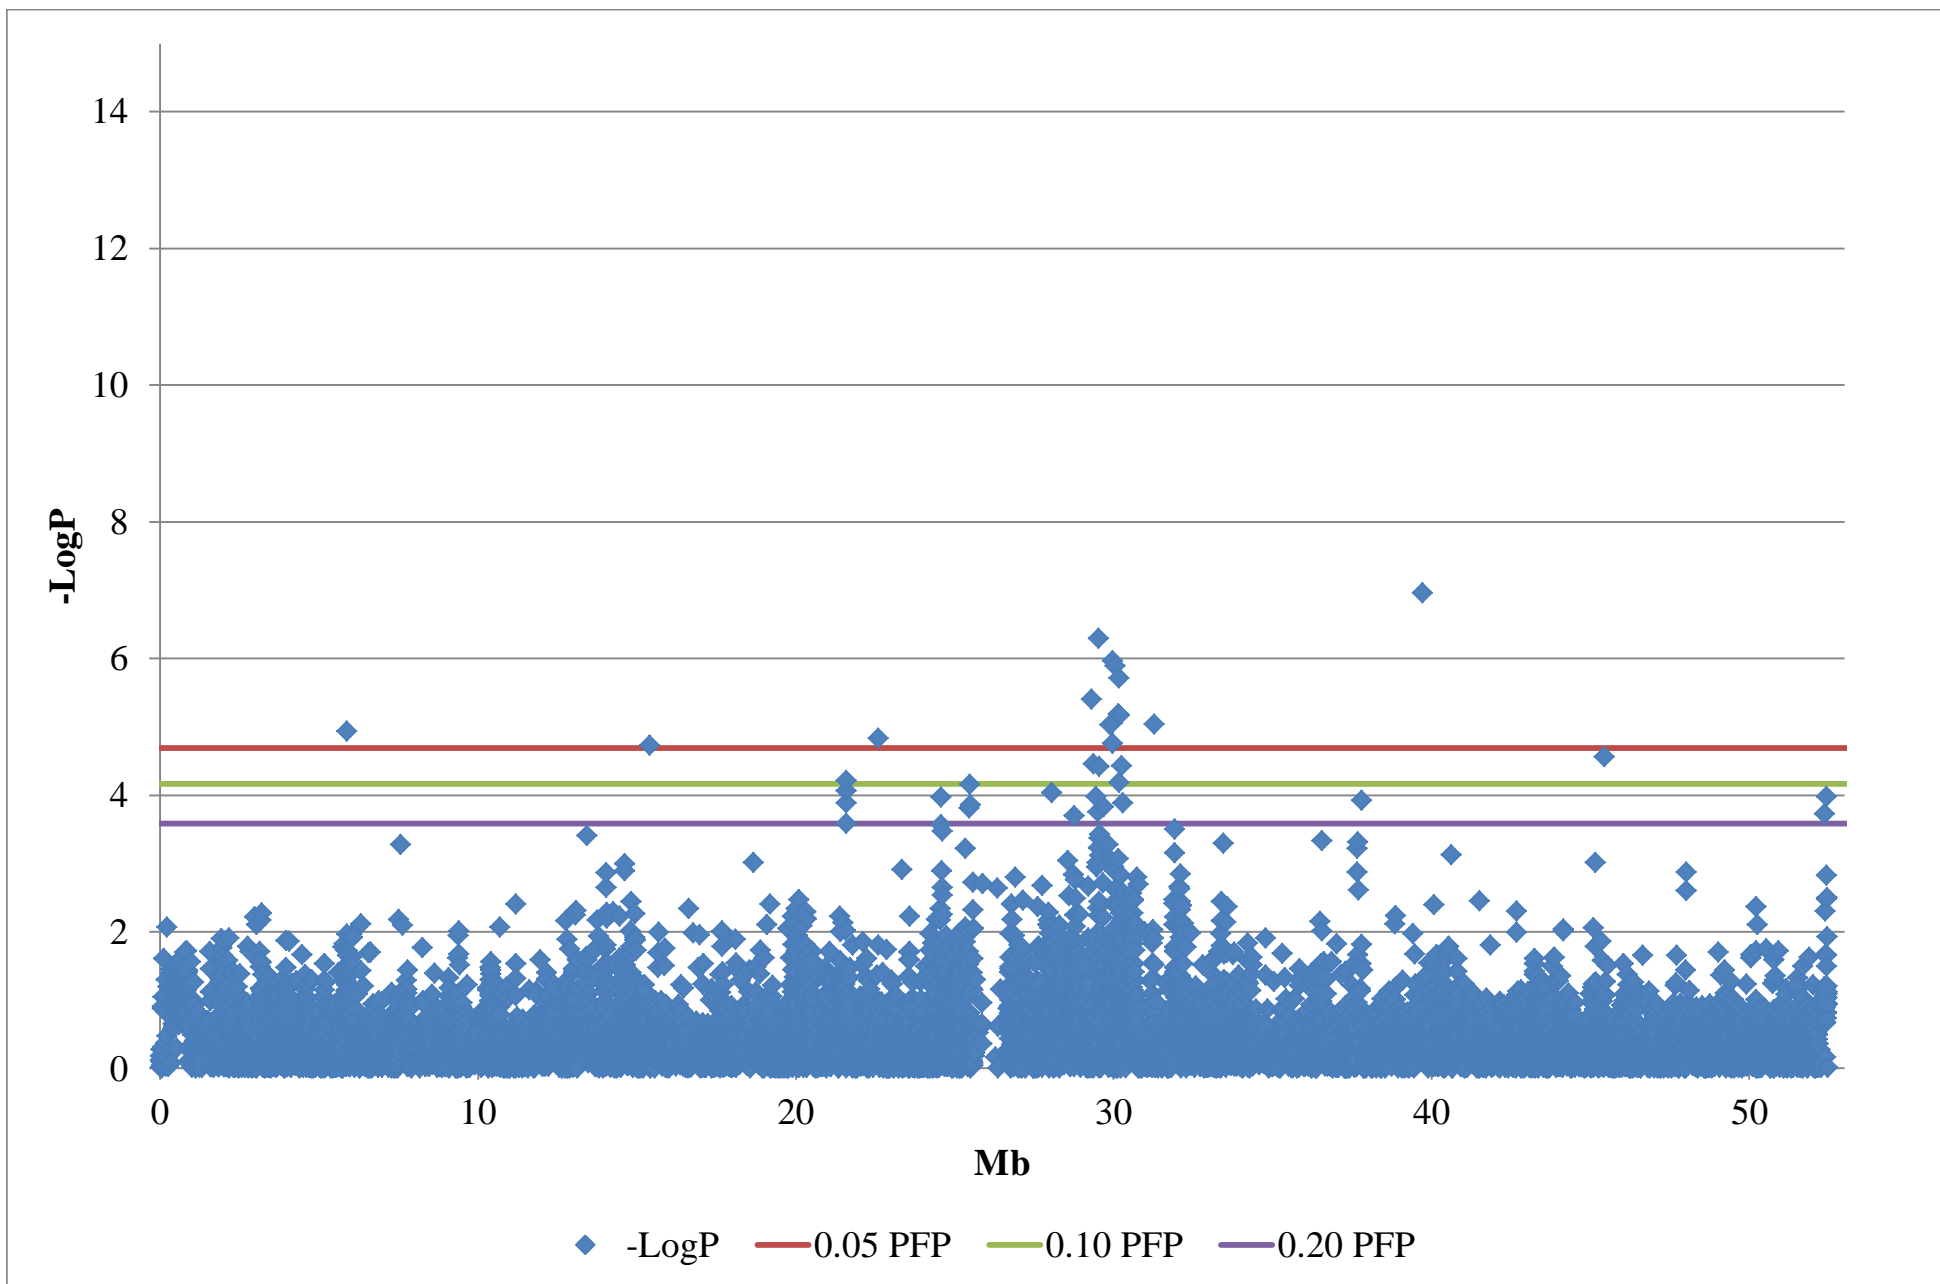

BTA 24

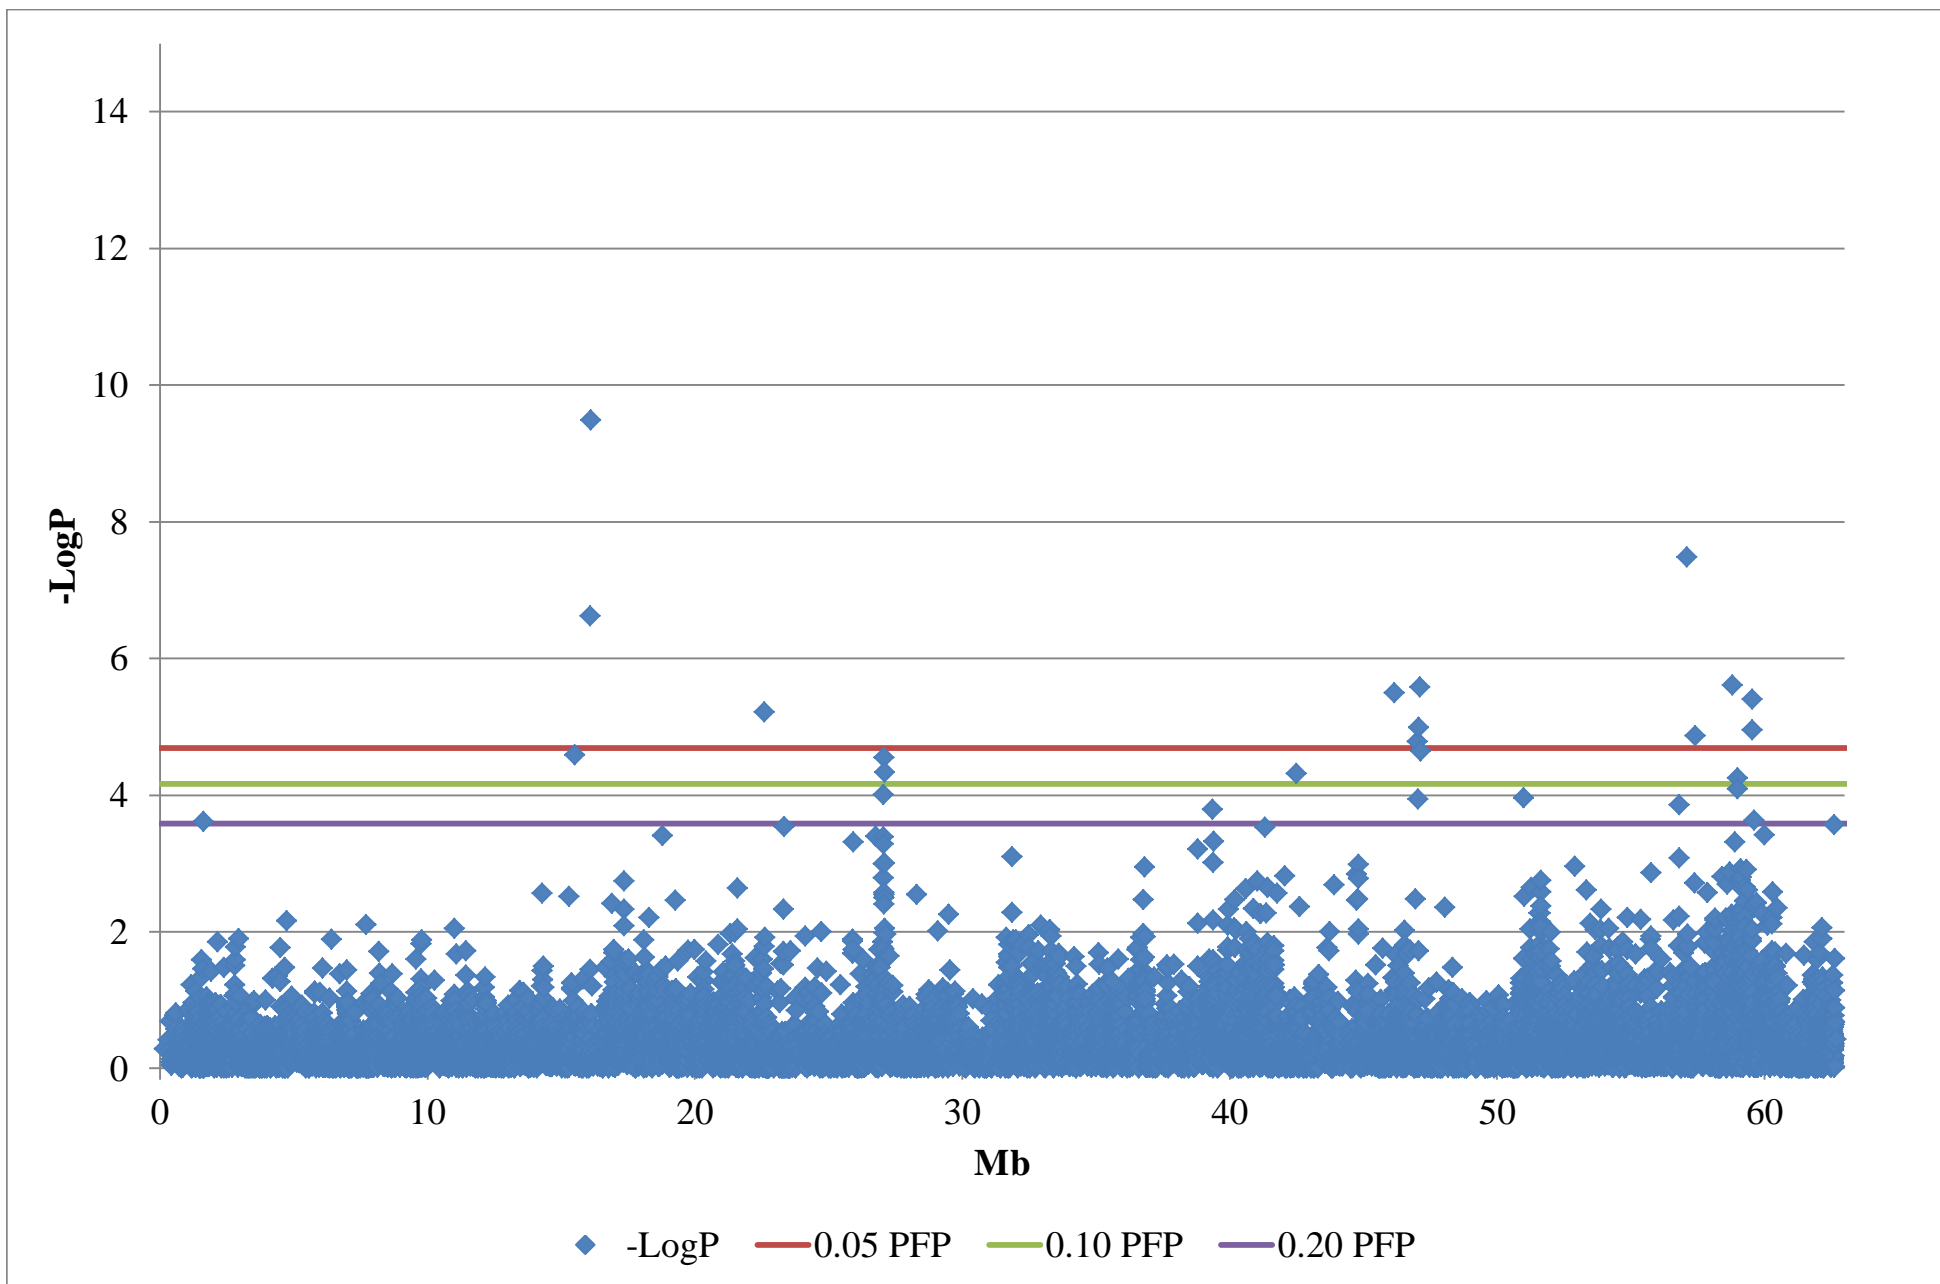



BTA 25

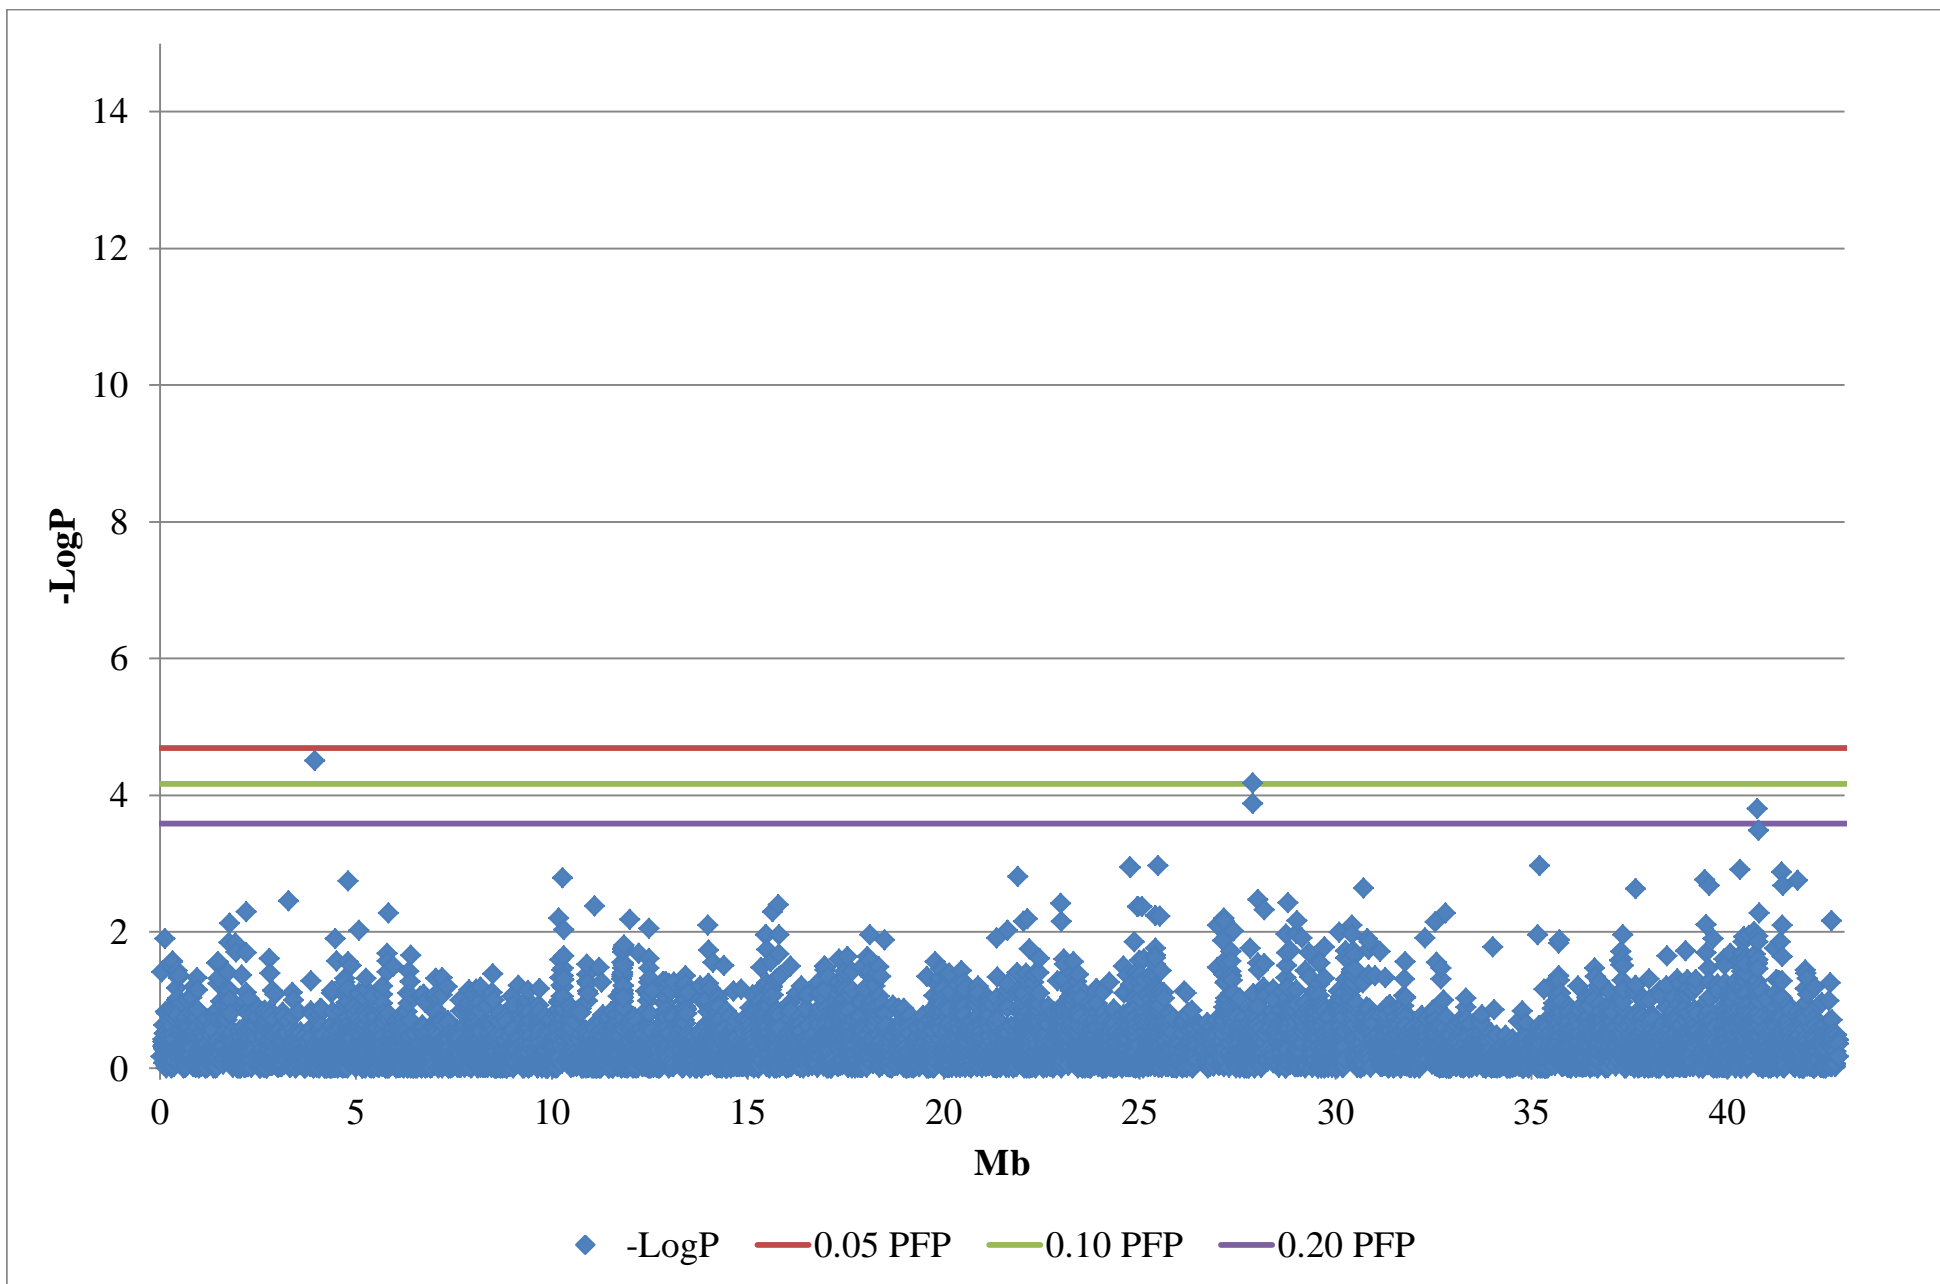

BTA 26

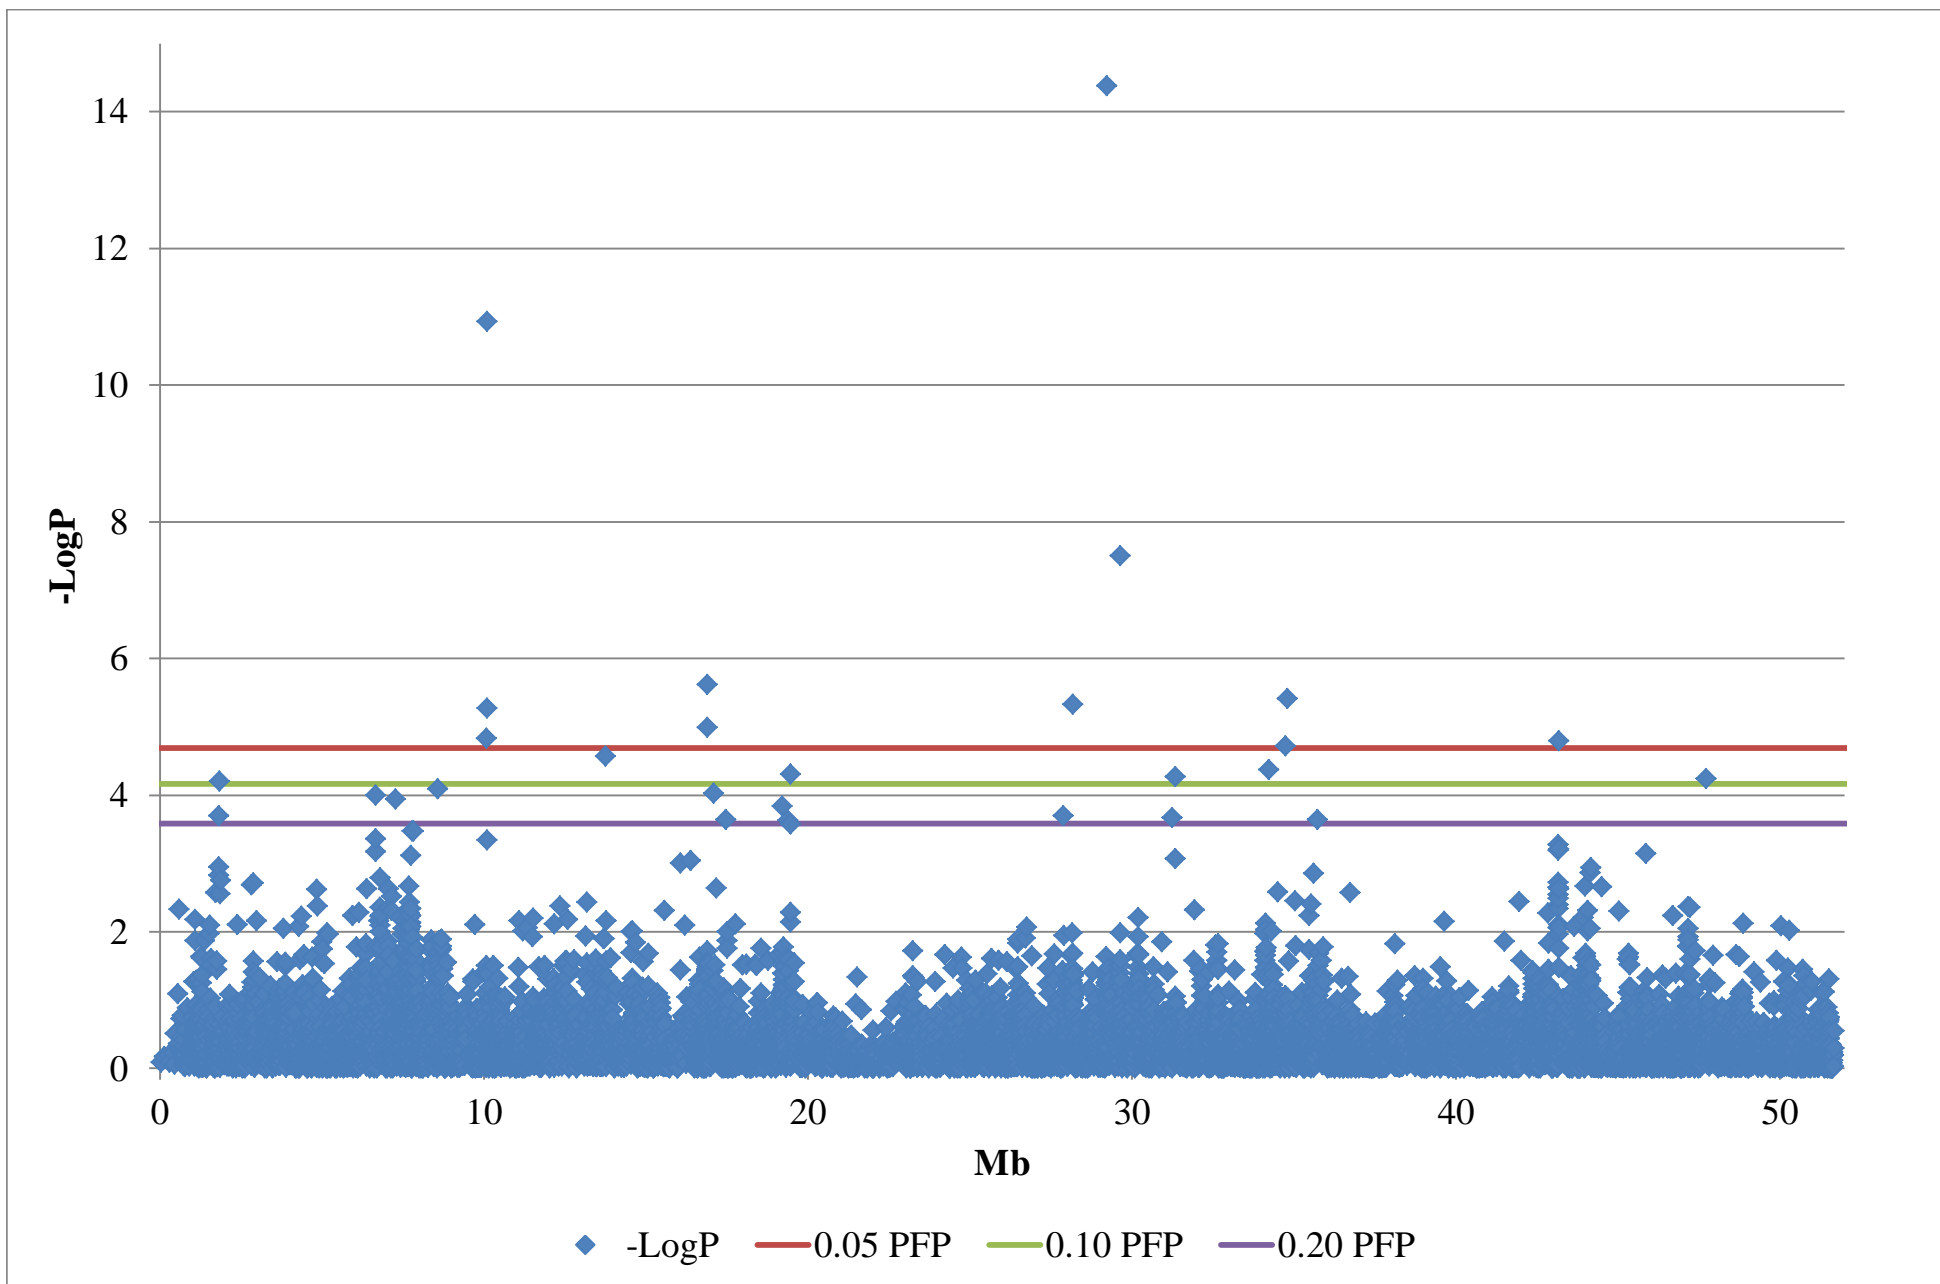

BTA 27

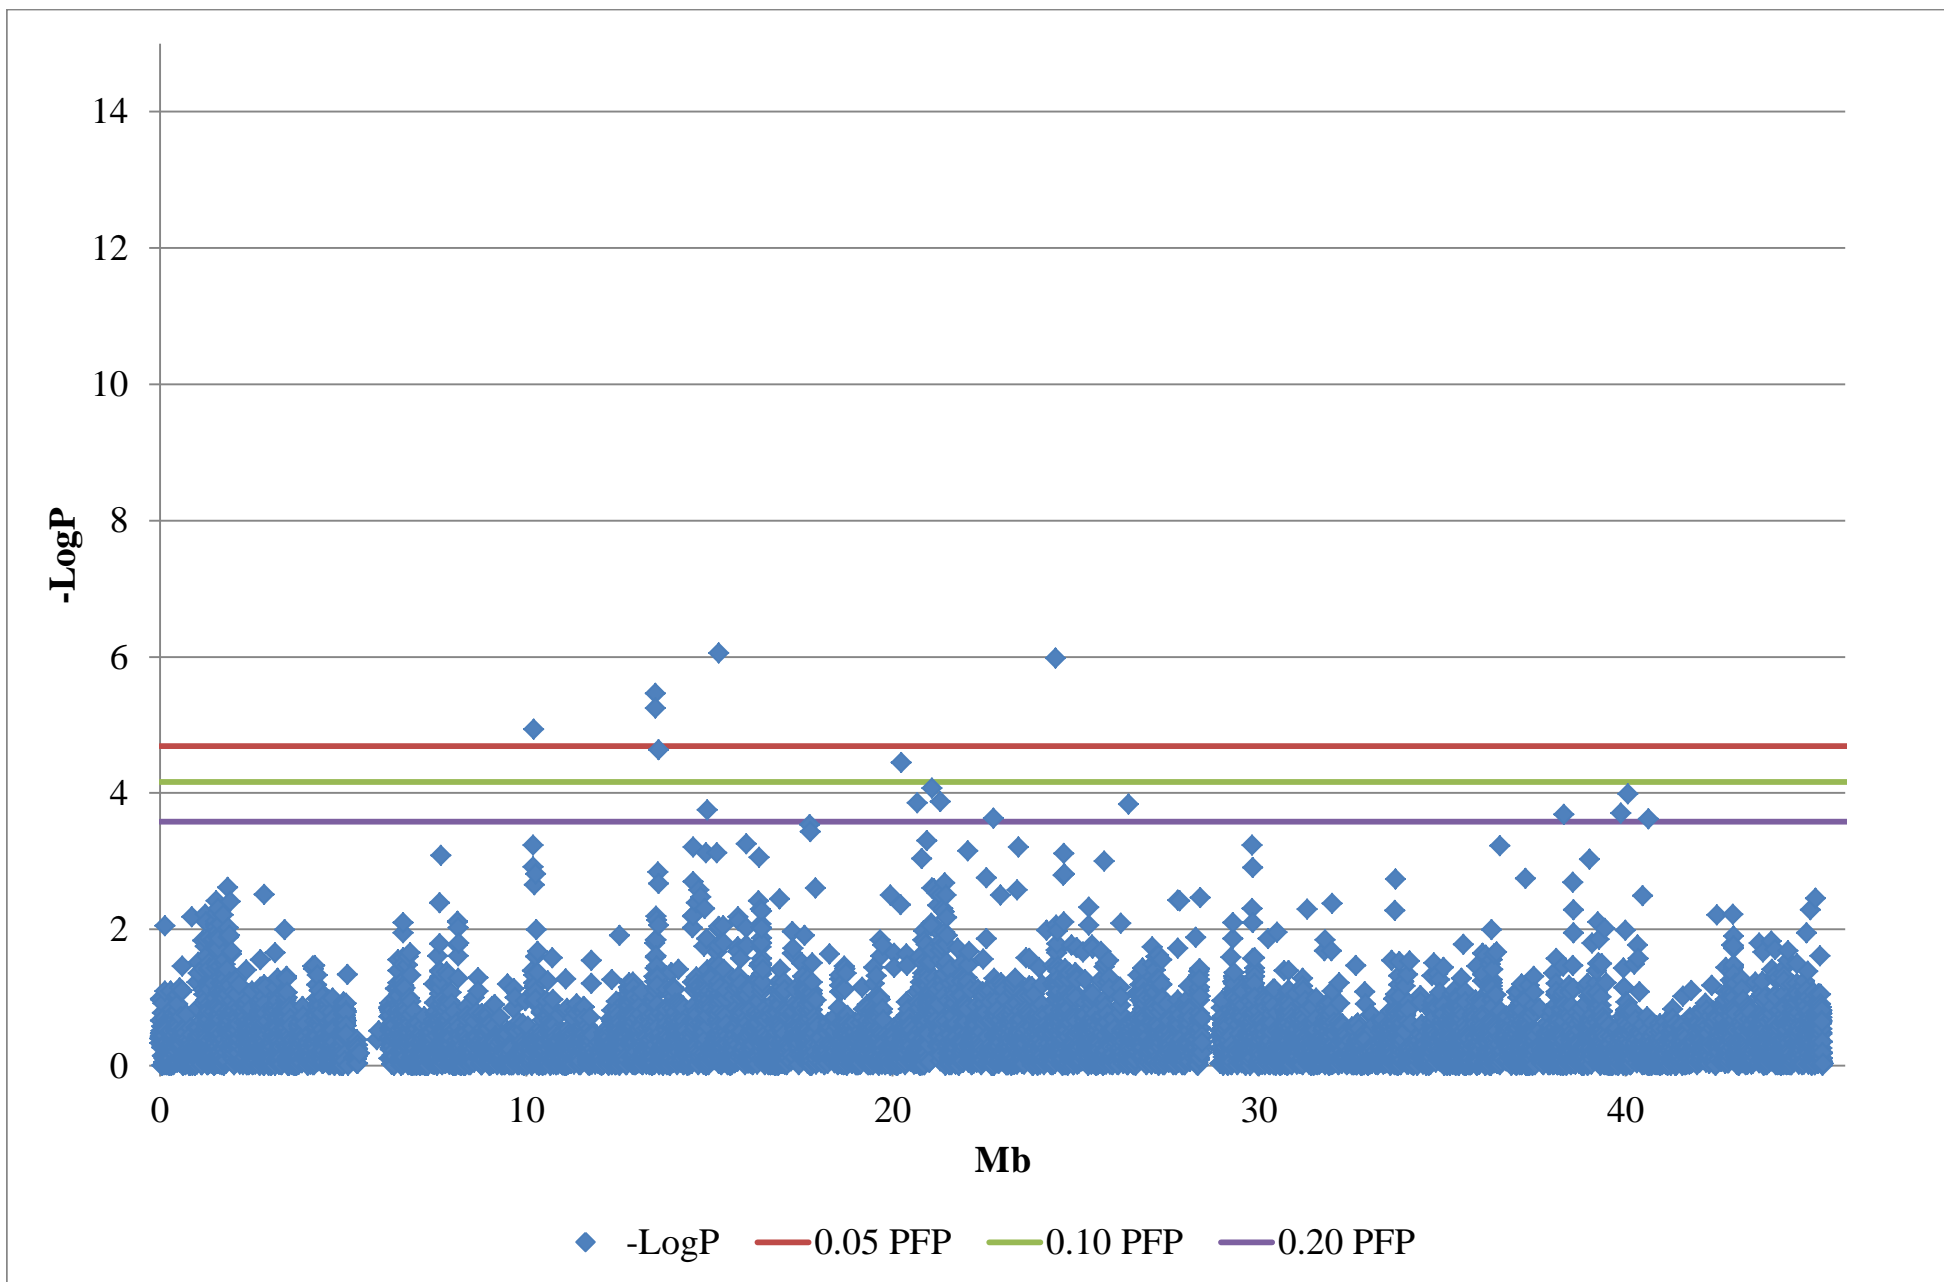

BTA 28

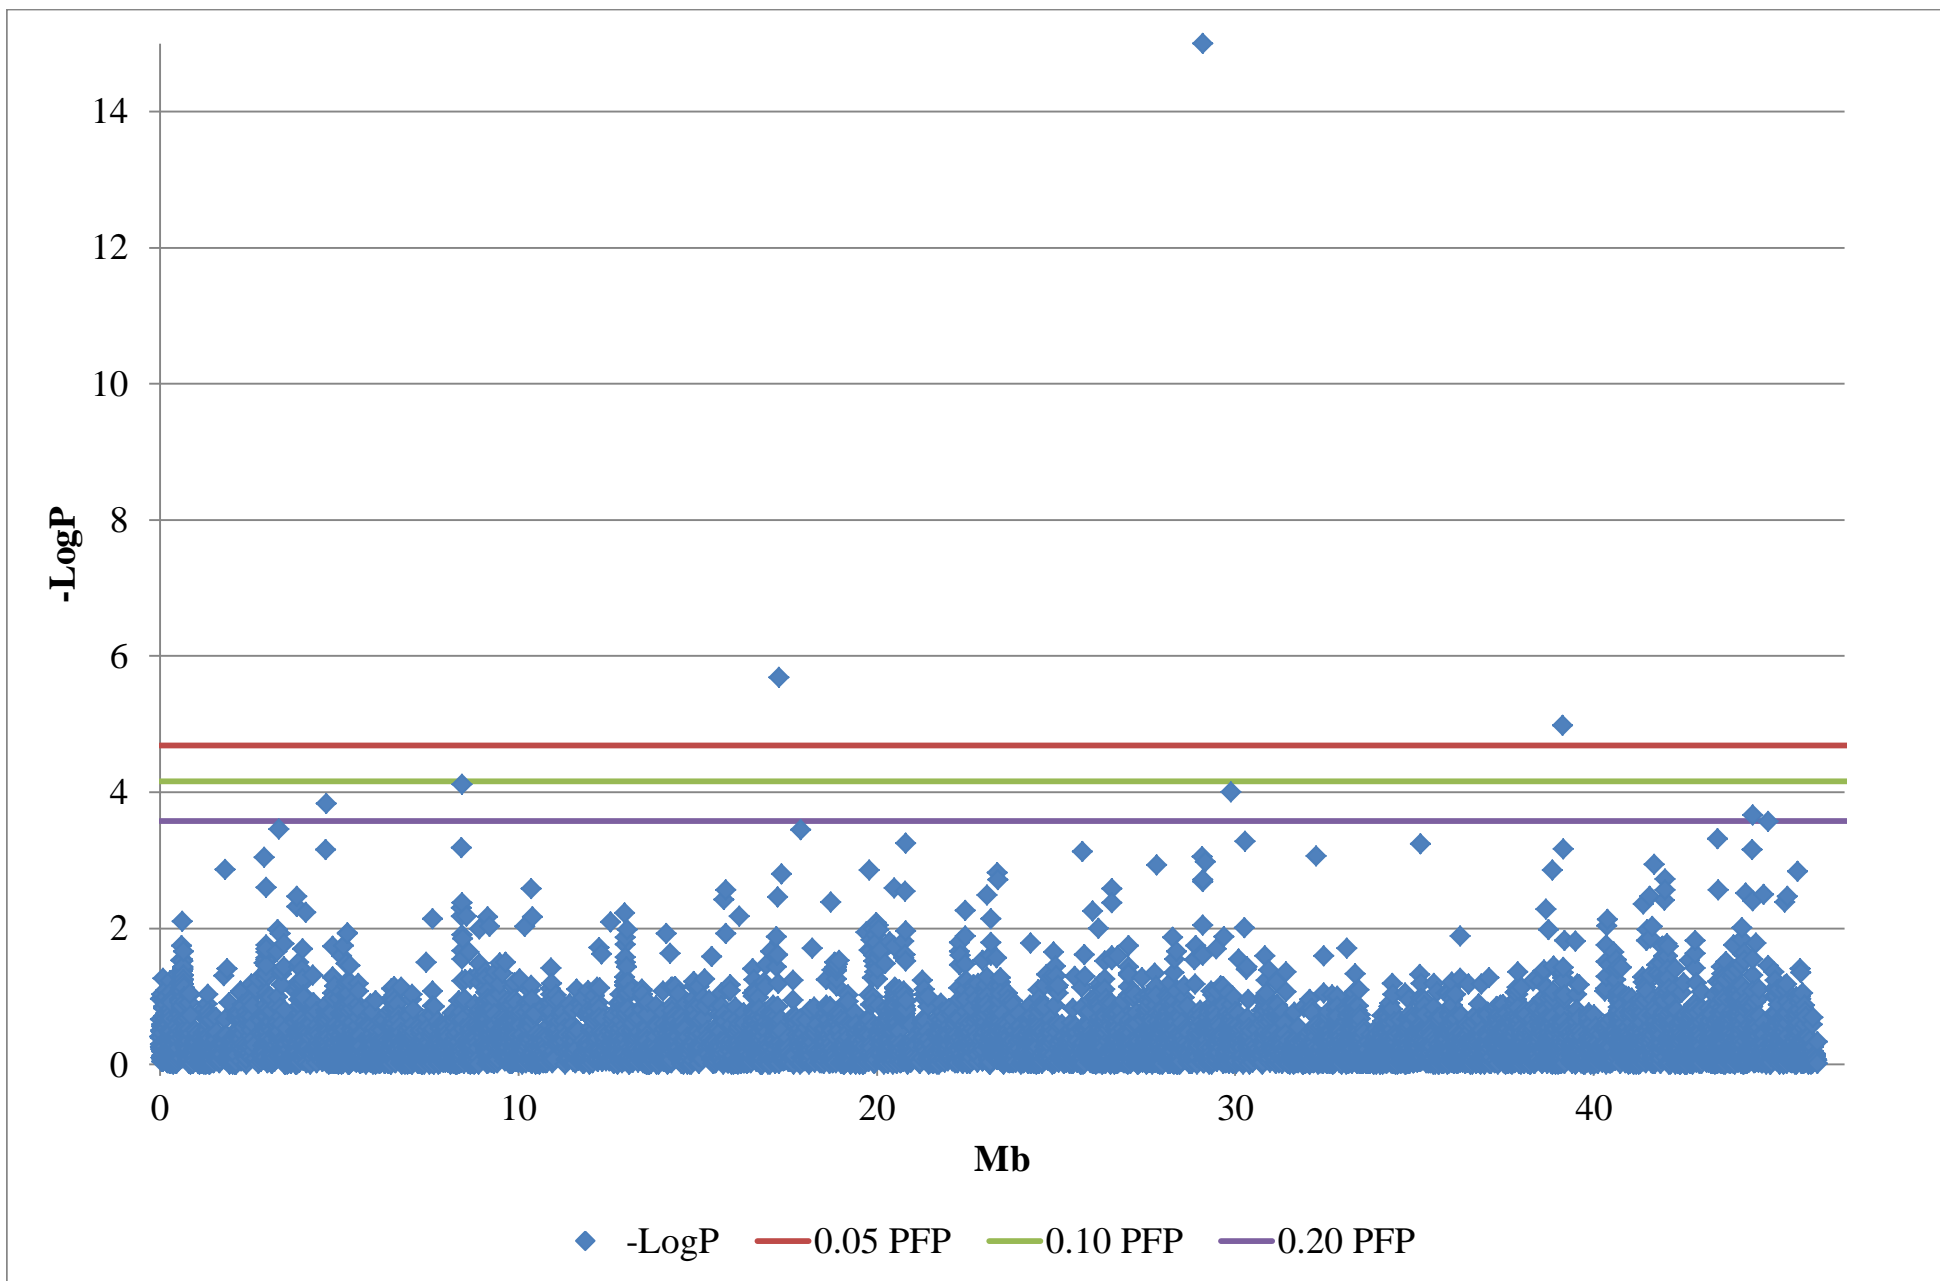

BTA 29

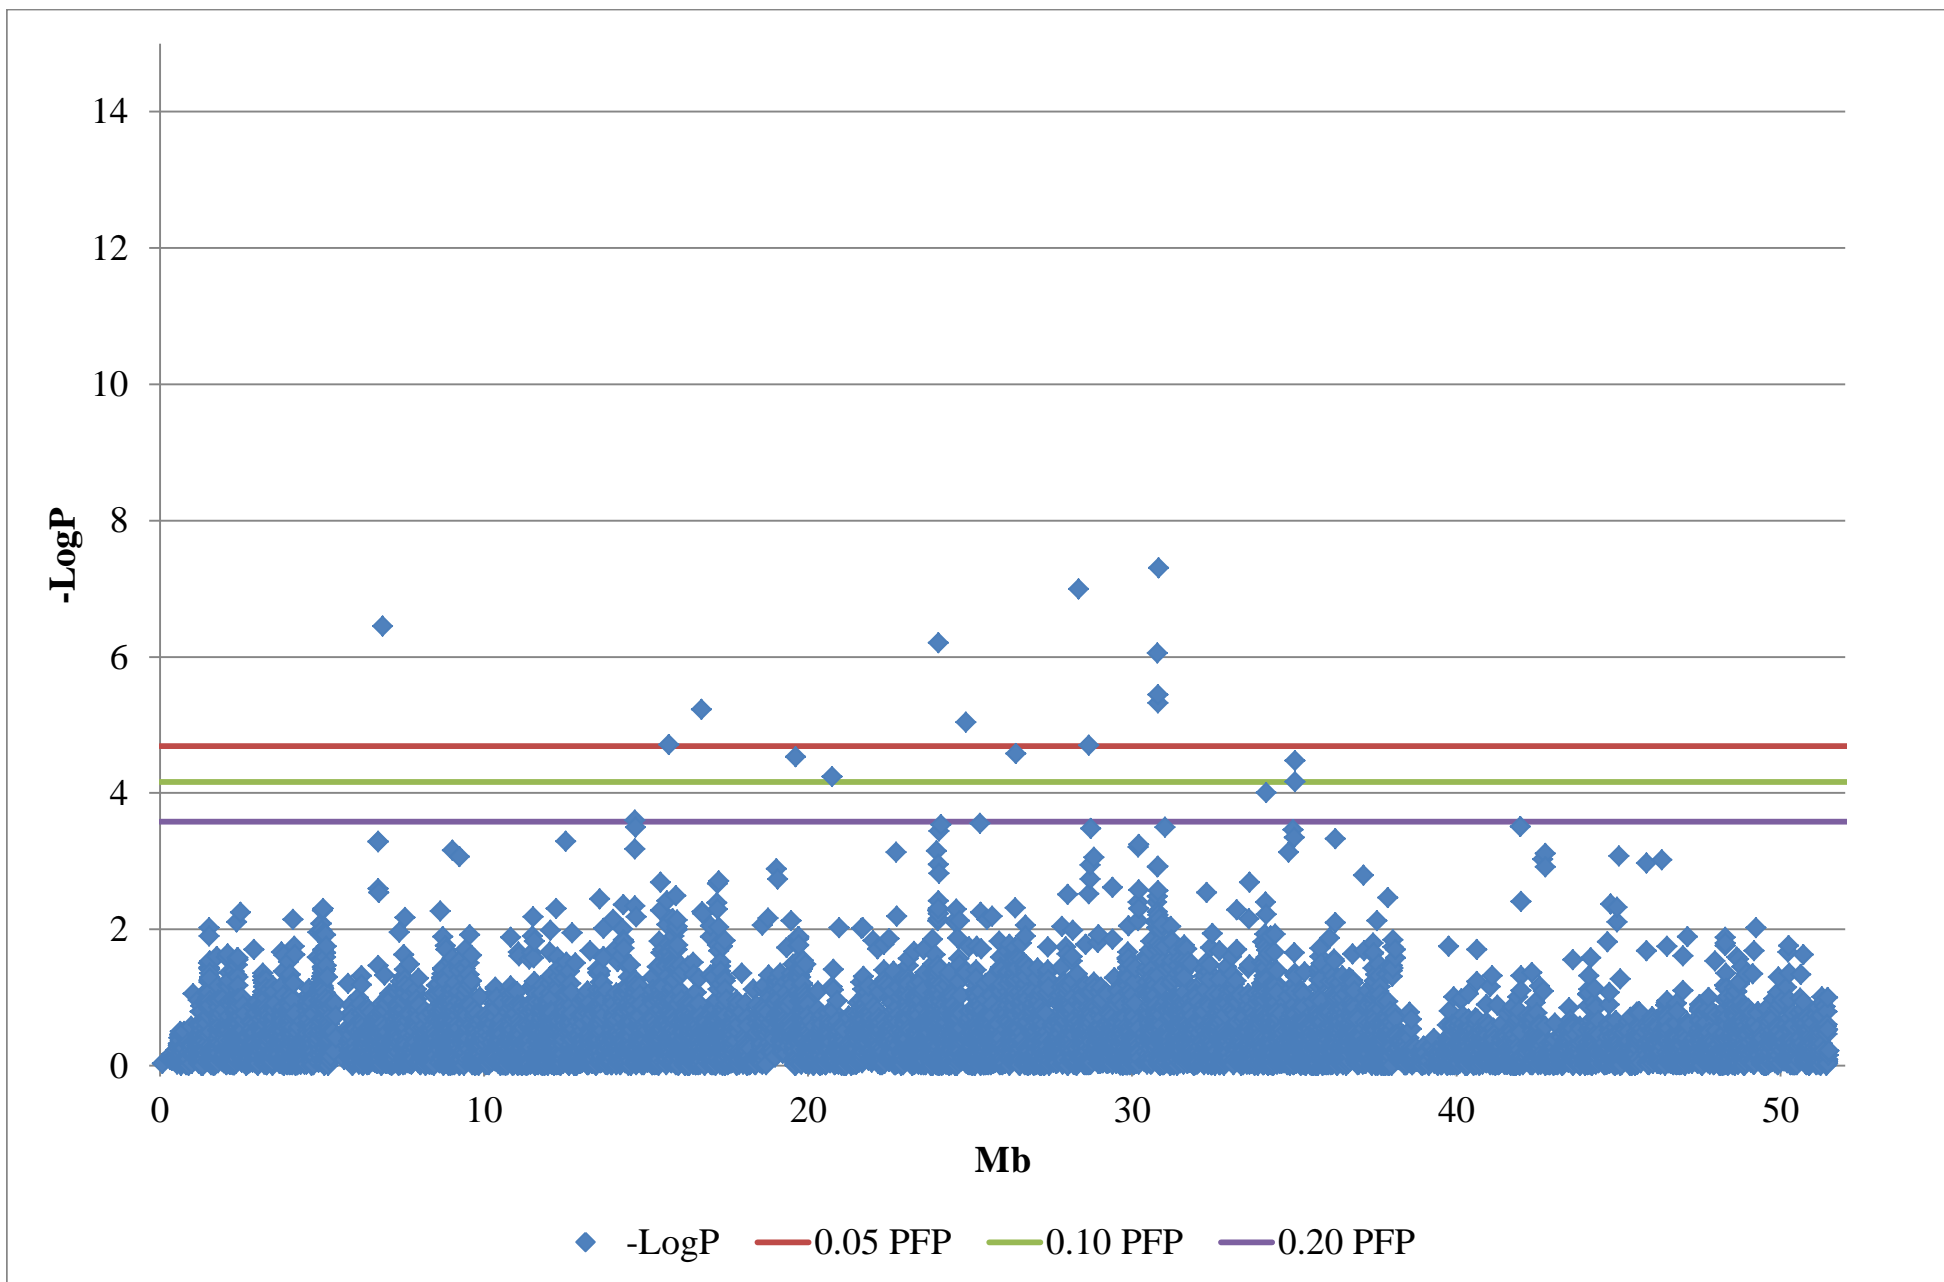

Supplement: pone.0153423.s001.pdf [file pone.0153423.s001.pdf]
